# Supplementary material for: DNA methylation GrimAge strongly predicts lifespan and healthspan
Source: Aging (Albany NY). 2019 Jan 21;11(2):303–27. doi: 10.18632/aging.101684 (PMC6366976; doi:10.18632/aging.101684)
Supplement: Supplementary Data 1 [file aging-11-101684-s008.xlsx]

## Sheet: Mortality
				Hazard Ratio
group	level	N	Nevent	AgeAccelGrim	scaledDNAmADM	scaledDNAmB2M	scaledDNAmCystatinC	scaledDNAmGDF.15	scaledDNAmLeptin	scaledDNAmPAI.1	scaledDNAmTIMP.1	DNAmPACKYRS
Age	<65years	3396	480	1.12308	1.62903	1.31352	1.69032	1.47097	1.67704	1.68288	2.09151	1.03056
	>=65years	3359	1310	1.09301	1.17777	1.29224	1.35606	1.28196	1.10547	1.27565	1.52019	1.02909
BMI	normal (18.5 to 25)	1504	443	1.10467	1.27069	1.39002	1.4485	1.53353	1.08466	1.28103	2.02472	1.02953
	over (25 to 30)	2509	572	1.1009	1.26844	1.34512	1.4841	1.34248	1.36689	1.41323	1.67394	1.03158
	obese (>30)	3086	771	1.10249	1.23693	1.2041	1.36102	1.20186	1.16886	1.46725	1.5524	1.02792
Education	< high school degree	960	299	1.07387	1.05053	1.05561	1.7244	1.26144	1.41218	1.18913	1.19682	1.02008
	high school degree	702	232	1.12848	1.45177	1.46991	1.33922	1.42593	1.23859	1.3535	2.53428	1.03801
	some colledge	1565	508	1.08649	1.35053	1.17946	1.10769	1.17496	1.13848	1.33922	1.2555	1.02764
	>= colledge graduate	1374	349	1.12316	1.65336	1.63247	1.42756	1.42657	1.37718	1.4604	2.07533	1.02587
Hypertension	No	3988	785	1.10644	1.34529	1.26509	1.34343	1.28801	1.33544	1.21237	1.41567	1.033
	Yes	3169	993	1.09385	1.16628	1.30023	1.46226	1.34635	1.11717	1.425	1.82985	1.02621
Type 2 diabetes	No	5725	1201	1.10261	1.19895	1.32347	1.34426	1.29855	1.16442	1.31958	1.62914	1.03191
	Yes	1009	310	1.08534	1.16746	1.2145	1.43902	1.27514	1.08115	1.42083	1.62601	1.01968
Cancer	No	5089	1389	1.10053	1.36031	1.26015	1.30279	1.27475	1.25186	1.33742	1.54367	1.02902
	Yes	281	84	1.06871	1.02585	1.91494	1.57193	1.24592	0.911365	1.13779	1.9533	1.0196
				P value
				The green color (light to dark) applied to unadjusted p values (<0.05) at each row
group	level	N	Nevent	AgeAccelGrim.P	scaledDNAmADM.P	scaledDNAmB2M.P	scaledDNAmCystatinC.P	scaledDNAmGDF.15.P	scaledDNAmLeptin.P	scaledDNAmPAI.1.P	scaledDNAmTIMP.1.P	DNAmPACKYRS.P
Age	<65years	3396	480	3.1402e-34	4.7728e-10	4.07008e-06	5.99059e-10	1.39901e-09	1.44053e-07	1.83039e-20	2.2754e-11	4.21117e-19
	>=65years	3359	1310	4.01206e-39	0.000471524	1.52889e-08	2.54515e-09	1.91515e-08	0.0962173	1.35517e-11	1.43202e-09	5.74528e-28
BMI	normal (18.5 to 25)	1504	443	7.69537e-21	0.00380556	3.94598e-05	0.000494025	2.48194e-07	0.440529	5.92771e-05	3.03784e-07	4.40359e-15
	over (25 to 30)	2509	572	7.33569e-27	0.000596386	1.15653e-06	2.50276e-08	7.78371e-07	0.000785621	5.29448e-12	1.38023e-07	9.46722e-19
	obese (>30)	3086	771	7.36578e-26	0.000245029	0.000612746	8.76854e-06	0.000577715	0.0629116	2.14171e-15	5.33281e-07	2.12742e-15
Education	< high school degree	960	299	6.04488e-08	0.639714	0.65989	2.09441e-05	0.00248257	0.0173948	0.0141777	0.287598	7.70669e-05
	high school degree	702	232	2.07261e-12	0.00162787	0.00145546	0.0280992	0.00334229	0.130452	0.000256705	3.50576e-06	1.18395e-10
	some colledge	1565	508	5.86548e-13	0.000162382	0.0270113	0.245288	0.0343293	0.16362	3.24682e-07	0.0442848	3.22673e-11
	>= colledge graduate	1374	349	4.47114e-15	3.77461e-07	2.15567e-08	0.00163173	0.000437552	0.00517809	5.50873e-08	1.41654e-07	2.6055e-06
Hypertension	No	3988	785	3.57691e-31	2.27855e-06	0.000205194	6.68251e-05	1.64355e-06	0.000189035	1.93638e-05	0.000328344	4.0468e-26
	Yes	3169	993	2.56691e-36	0.00264222	3.9052e-09	9.77155e-13	1.89859e-10	0.11709	1.12079e-17	1.30696e-16	1.03478e-20
Type 2 diabetes	No	5725	1201	5.27635e-49	0.000232657	1.2831e-09	8.45984e-07	2.73683e-08	0.0182735	3.26088e-14	8.78052e-11	2.70542e-38
	Yes	1009	310	3.60453e-10	0.0958592	0.00630148	3.00674e-05	0.000184766	0.585712	1.01453e-05	2.1925e-05	0.00031455
Cancer	No	5089	1389	1.68308e-45	1.67485e-10	1.39402e-06	9.07729e-07	2.67494e-08	8.01416e-05	4.43079e-18	1.66696e-09	5.74259e-32
	Yes	281	84	0.0135868	0.873079	0.0114828	0.127607	0.4728	0.78007	0.299259	0.0920447	0.0453263

## Sheet: CHD
				Hazard Ratio
group	level	N	Nevent	AgeAccelGrim	scaledDNAmADM	scaledDNAmB2M	scaledDNAmCystatinC	scaledDNAmGDF.15	scaledDNAmLeptin	scaledDNAmPAI.1	scaledDNAmTIMP.1	DNAmPACKYRS
Age	<65years	3343	370	1.09573	1.3992	1.36493	1.39273	1.36781	1.39906	1.39013	1.68513	1.02461
	>=65years	2561	584	1.06009	1.15526	1.23676	1.29083	1.12997	1.08911	1.2421	1.35095	1.01664
BMI	normal (18.5 to 25)	757	176	1.10175	1.5354	1.5109	1.72303	1.53953	1.35806	1.24952	1.84576	1.02488
	over (25 to 30)	1872	285	1.0632	1.21162	1.31016	1.12948	1.18576	1.16906	1.2506	1.16935	1.02032
	obese (>30)	2668	450	1.0805	1.15811	1.2367	1.30059	1.16259	1.14007	1.3745	1.5505	1.02325
Education	< high school degree	270	85	1.06966	1.08122	0.900552	1.20178	1.26145	0.8065	1.09144	1.50905	1.027
	high school degree	459	140	1.08048	1.48958	1.51167	1.29639	1.18946	1.15524	1.45664	1.64818	1.01684
	some colledge	1604	342	1.07968	1.23018	1.22908	1.35793	1.09204	1.14445	1.26783	1.35968	1.02399
	>= colledge graduate	746	184	1.08446	1.34467	1.5785	1.10738	1.28226	1.41607	1.36048	1.82694	1.01703
Hypertension	No	1888	351	1.08145	1.36363	1.18689	1.17604	1.06155	1.26349	1.23977	1.23363	1.02529
	Yes	2753	549	1.06873	1.18432	1.34841	1.31719	1.35779	1.11017	1.23057	1.40344	1.01851
Type 2 diabetes	No	4515	557	1.07305	1.15268	1.31657	1.29348	1.17208	1.2227	1.21152	1.26339	1.02315
	Yes	650	159	1.06423	1.08068	1.30997	1.22698	1.32982	1.11457	1.13954	1.39874	1.01698
Cancer	No	3950	776	1.07788	1.29357	1.31469	1.33977	1.16801	1.22909	1.30719	1.54187	1.02043
	Yes	176	37	1.07247	0.932615	2.75375	1.17352	1.70995	0.594588	1.40778	1.47022	1.02142
				P value
				The green color (light to dark) applied to unadjusted p values (<0.05) at each row
group	level	N	Nevent	AgeAccelGrim.P	scaledDNAmADM.P	scaledDNAmB2M.P	scaledDNAmCystatinC.P	scaledDNAmGDF.15.P	scaledDNAmLeptin.P	scaledDNAmPAI.1.P	scaledDNAmTIMP.1.P	DNAmPACKYRS.P
Age	<65years	3343	370	8.47634e-16	0.000130612	5.40505e-06	0.000493074	6.93976e-05	0.00210581	1.07483e-08	7.29437e-05	1.76431e-09
	>=65years	2561	584	7.22771e-08	0.0360236	0.00405507	0.00120843	0.106558	0.29724	3.18867e-05	0.00490977	0.000104752
BMI	normal (18.5 to 25)	757	176	9.96623e-08	0.0012837	0.00463871	0.001122	0.00306284	0.0294732	0.016286	0.0163218	6.31195e-05
	over (25 to 30)	1872	285	2.70981e-06	0.0504203	0.00333109	0.286195	0.0841889	0.19024	0.000746625	0.268537	0.000116514
	obese (>30)	2668	450	4.32182e-10	0.0657974	0.00279085	0.00278891	0.0664259	0.203015	1.62576e-07	0.000195752	1.64261e-06
Education	< high school degree	270	85	0.0097879	0.658968	0.579431	0.298454	0.174695	0.335879	0.485432	0.133099	0.00414085
	high school degree	459	140	0.000384365	0.0086244	0.00567543	0.100087	0.29853	0.404196	0.000332226	0.0453729	0.0402116
	some colledge	1604	342	1.87234e-08	0.0222019	0.0212879	0.00250534	0.353681	0.232285	0.00020212	0.0316262	1.32995e-06
	>= colledge graduate	746	184	4.00859e-05	0.0247598	0.000194795	0.511887	0.0751617	0.0175307	0.000380815	0.00333085	0.0178114
Hypertension	No	1888	351	1.10218e-08	0.00131918	0.0737458	0.132325	0.528971	0.0217666	0.00125542	0.12748	1.44095e-07
	Yes	2753	549	2.3465e-11	0.0151705	1.34312e-06	0.000328151	2.19338e-05	0.236385	0.000102844	0.00131567	3.73959e-06
Type 2 diabetes	No	4515	557	2.83691e-12	0.0478475	8.19885e-05	0.00217774	0.0304629	0.0175513	0.000216692	0.0316579	8.27303e-10
	Yes	650	159	0.00138889	0.57394	0.00903392	0.17126	0.0161205	0.54962	0.21657	0.0757465	0.0224708
Cancer	No	3950	776	2.5226e-17	4.06234e-05	6.27583e-06	1.20927e-05	0.016355	0.00320928	2.52458e-10	9.29081e-06	9.8268e-10
	Yes	176	37	0.089475	0.701019	0.0191753	0.664572	0.11473	0.194543	0.0960401	0.398491	0.191689
