# Supplementary material for: DNA methylation GrimAge strongly predicts lifespan and healthspan
Source: Aging (Albany NY). 2019 Jan 21;11(2):303–27. doi: 10.18632/aging.101684 (PMC6366976; doi:10.18632/aging.101684)
Supplement: Supplementary Data 2 [file aging-11-101684-s009.xlsx]

## Sheet: Meta analysis across studies
var	cell	Meta.Correlation	Meta.P
AgeAccelGrim	Bcell	-0.18	9.7e-43
AgeAccelGrim	CD4T	-0.21	1.8e-57
AgeAccelGrim	CD4.naive	-0.1	2.1e-12
AgeAccelGrim	CD8.naive	-0.22	9.2e-62
AgeAccelGrim	CD8T	-0.05	1.4e-04
AgeAccelGrim	CD8pCD28nCD45RAn	0.18	8.7e-40
AgeAccelGrim	NK	-0.14	5.3e-24
AgeAccelGrim	PlasmaBlast	0.22	7.3e-63
AgeAccelGrim	Mono	0.08	2.4e-09
AgeAccelGrim	Gran	0.24	1.5e-74
adj.DNAm ADM	Bcell	-0.1	1.4e-13
adj.DNAm ADM	CD4T	-0.04	4.7e-03
adj.DNAm ADM	CD4.naive	0.06	2.1e-06
adj.DNAm ADM	CD8.naive	-0.06	2.3e-06
adj.DNAm ADM	CD8T	-0.08	2.2e-09
adj.DNAm ADM	CD8pCD28nCD45RAn	0.05	7.2e-04
adj.DNAm ADM	NK	-0.15	3.6e-29
adj.DNAm ADM	PlasmaBlast	0.11	1.8e-15
adj.DNAm ADM	Mono	-0.06	2.2e-06
adj.DNAm ADM	Gran	0.15	2.8e-30
adj.DNAm B2M	Bcell	-0.05	7.8e-05
adj.DNAm B2M	CD4T	-0.18	1.6e-40
adj.DNAm B2M	CD4.naive	-0.13	7.8e-23
adj.DNAm B2M	CD8.naive	-0.2	6.8e-52
adj.DNAm B2M	CD8T	-0.02	1.6e-01
adj.DNAm B2M	CD8pCD28nCD45RAn	0.14	7.6e-24
adj.DNAm B2M	NK	-0.07	5.9e-07
adj.DNAm B2M	PlasmaBlast	0.14	4.1e-25
adj.DNAm B2M	Mono	0.07	9.3e-08
adj.DNAm B2M	Gran	0.15	1.1e-27
adj.DNAm Cystatin C	Bcell	-0.23	2.5e-66
adj.DNAm Cystatin C	CD4T	-0.33	3.4e-142
adj.DNAm Cystatin C	CD4.naive	-0.2	1.7e-51
adj.DNAm Cystatin C	CD8.naive	-0.19	5.7e-44
adj.DNAm Cystatin C	CD8T	-0.03	4.6e-02
adj.DNAm Cystatin C	CD8pCD28nCD45RAn	0.2	1.2e-50
adj.DNAm Cystatin C	NK	-0.02	7.2e-02
adj.DNAm Cystatin C	PlasmaBlast	0.18	4.7e-41
adj.DNAm Cystatin C	Mono	0.1	1.3e-13
adj.DNAm Cystatin C	Gran	0.24	2.6e-76
adj.DNAm GDF-15	Bcell	-0.11	7.8e-17
adj.DNAm GDF-15	CD4T	-0.19	1.1e-44
adj.DNAm GDF-15	CD4.naive	-0.19	3.3e-46
adj.DNAm GDF-15	CD8.naive	-0.22	1.9e-60
adj.DNAm GDF-15	CD8T	0.02	2.3e-01
adj.DNAm GDF-15	CD8pCD28nCD45RAn	0.18	4.9e-40
adj.DNAm GDF-15	NK	-0.02	2.1e-01
adj.DNAm GDF-15	PlasmaBlast	0.09	2.9e-11
adj.DNAm GDF-15	Mono	0.03	1.5e-02
adj.DNAm GDF-15	Gran	0.14	1.5e-26
adj.DNAm Leptin	Bcell	0.14	5.2e-27
adj.DNAm Leptin	CD4T	0.17	1.5e-37
adj.DNAm Leptin	CD4.naive	0.08	1.1e-08
adj.DNAm Leptin	CD8.naive	0.01	3.7e-01
adj.DNAm Leptin	CD8T	0.04	7.1e-03
adj.DNAm Leptin	CD8pCD28nCD45RAn	-0.07	4.3e-08
adj.DNAm Leptin	NK	0.03	1.5e-02
adj.DNAm Leptin	PlasmaBlast	-0.15	1.7e-30
adj.DNAm Leptin	Mono	-0.15	2.5e-29
adj.DNAm Leptin	Gran	-0.11	2.9e-16
adj.DNAm PAI-1	Bcell	-0.12	1.5e-19
adj.DNAm PAI-1	CD4T	-0.11	7.6e-15
adj.DNAm PAI-1	CD4.naive	-0.06	4.7e-06
adj.DNAm PAI-1	CD8.naive	-0.09	2.7e-10
adj.DNAm PAI-1	CD8T	-0.08	2.8e-09
adj.DNAm PAI-1	CD8pCD28nCD45RAn	0.1	9.6e-13
adj.DNAm PAI-1	NK	-0.02	9.2e-02
adj.DNAm PAI-1	PlasmaBlast	0.17	3.6e-37
adj.DNAm PAI-1	Mono	0.05	6.8e-05
adj.DNAm PAI-1	Gran	0.16	3.2e-34
adj.DNAm TIMP-1	Bcell	-0.24	1.6e-75
adj.DNAm TIMP-1	CD4T	-0.29	1.4e-107
adj.DNAm TIMP-1	CD4.naive	-0.14	3.3e-26
adj.DNAm TIMP-1	CD8.naive	-0.13	1e-20
adj.DNAm TIMP-1	CD8T	-0.14	8.1e-26
adj.DNAm TIMP-1	CD8pCD28nCD45RAn	0.14	1.2e-25
adj.DNAm TIMP-1	NK	-0.12	1.8e-18
adj.DNAm TIMP-1	PlasmaBlast	0.31	1e-127
adj.DNAm TIMP-1	Mono	0.08	4.7e-09
adj.DNAm TIMP-1	Gran	0.36	2.7e-172
adj.DNAm PACKYRS	Bcell	-0.04	2.6e-03
adj.DNAm PACKYRS	CD4T	-0.04	1.2e-03
adj.DNAm PACKYRS	CD4.naive	0.01	5.7e-01
adj.DNAm PACKYRS	CD8.naive	-0.14	3.5e-24
adj.DNAm PACKYRS	CD8T	0.02	1e-01
adj.DNAm PACKYRS	CD8pCD28nCD45RAn	0.08	2.6e-08
adj.DNAm PACKYRS	NK	-0.11	1.7e-16
adj.DNAm PACKYRS	PlasmaBlast	0.06	9.4e-06
adj.DNAm PACKYRS	Mono	0.03	2.8e-02
adj.DNAm PACKYRS	Gran	0.06	3e-06

## Sheet: AgeAccelGrim
data	var	cell	Correlation	SE	P
FHS test	AgeAccelGrim	Bcell	-0.271093	0.0385639	5.4531e-12
WHI BA23	AgeAccelGrim	Bcell	-0.127651	0.0216175	4.10119e-09
JHS	AgeAccelGrim	Bcell	-0.211305	0.023405	4.49587e-19
InChianti	AgeAccelGrim	Bcell	-0.192003	0.0323205	4.02158e-09
FHS test	AgeAccelGrim	CD4.naive	-0.0529634	0.0400079	0.186047
WHI BA23	AgeAccelGrim	CD4.naive	-0.0924658	0.0217025	2.12855e-05
JHS	AgeAccelGrim	CD4.naive	-0.129409	0.0237443	5.75211e-08
InChianti	AgeAccelGrim	CD4.naive	-0.0647241	0.0328642	0.0492014
FHS test	AgeAccelGrim	CD4T	-0.277918	0.0384858	1.50667e-12
WHI BA23	AgeAccelGrim	CD4T	-0.183505	0.0214257	2.05845e-17
JHS	AgeAccelGrim	CD4T	-0.221878	0.0233488	6.49039e-21
InChianti	AgeAccelGrim	CD4T	-0.214467	0.0321669	4.48156e-11
FHS test	AgeAccelGrim	CD8.naive	-0.15326	0.0395908	0.000119775
WHI BA23	AgeAccelGrim	CD8.naive	-0.242441	0.0211456	1.457e-29
JHS	AgeAccelGrim	CD8.naive	-0.216128	0.0233797	6.6856e-20
InChianti	AgeAccelGrim	CD8.naive	-0.220465	0.0321229	1.23537e-11
FHS test	AgeAccelGrim	CD8pCD28nCD45RAn	0.258604	0.0387013	5.23312e-11
WHI BA23	AgeAccelGrim	CD8pCD28nCD45RAn	0.141949	0.0215752	5.94695e-11
JHS	AgeAccelGrim	CD8pCD28nCD45RAn	0.169833	0.0235978	9.10827e-13
InChianti	AgeAccelGrim	CD8pCD28nCD45RAn	0.210576	0.0321948	1.01357e-10
FHS test	AgeAccelGrim	CD8T	-0.0746424	0.0399524	0.0621916
WHI BA23	AgeAccelGrim	CD8T	0.0221039	0.0217905	0.310517
JHS	AgeAccelGrim	CD8T	-0.104243	0.0238152	1.27374e-05
InChianti	AgeAccelGrim	CD8T	-0.103885	0.0327551	0.00156624
FHS test	AgeAccelGrim	Gran	0.363264	0.0373272	6.23566e-21
WHI BA23	AgeAccelGrim	Gran	0.190237	0.0213978	1.27807e-18
JHS	AgeAccelGrim	Gran	0.254957	0.0231543	2.61531e-27
InChianti	AgeAccelGrim	Gran	0.238102	0.0319861	2.2403e-13
FHS test	AgeAccelGrim	Mono	0.0831397	0.0399254	0.0377158
WHI BA23	AgeAccelGrim	Mono	0.000211882	0.0217959	0.992245
JHS	AgeAccelGrim	Mono	0.121215	0.0237691	3.77235e-07
InChianti	AgeAccelGrim	Mono	0.182046	0.0323829	2.50582e-08
FHS test	AgeAccelGrim	NK	-0.231699	0.0389739	4.60577e-09
WHI BA23	AgeAccelGrim	NK	-0.117715	0.0216443	5.99284e-08
JHS	AgeAccelGrim	NK	-0.122155	0.0237663	3.05869e-07
InChianti	AgeAccelGrim	NK	-0.137782	0.0326191	2.63859e-05
FHS test	AgeAccelGrim	PlasmaBlast	0.329382	0.0378284	2.78768e-17
WHI BA23	AgeAccelGrim	PlasmaBlast	0.149346	0.0215514	5.58396e-12
JHS	AgeAccelGrim	PlasmaBlast	0.21964	0.0233609	1.6212e-20
InChianti	AgeAccelGrim	PlasmaBlast	0.304391	0.0313705	2.91669e-21

## Sheet: adj.DNAm ADM
data	var	cell	Correlation	SE	P
FHS test	adj.DNAm ADM	Bcell	-0.0122132	0.0400612	0.760571
WHI BA23	adj.DNAm ADM	Bcell	-0.203874	0.0213381	3.32018e-21
JHS	adj.DNAm ADM	Bcell	-0.0438384	0.0239226	0.0670463
InChianti	adj.DNAm ADM	Bcell	-0.0171251	0.0329284	0.603139
FHS test	adj.DNAm ADM	CD4.naive	0.170534	0.0394773	1.81717e-05
WHI BA23	adj.DNAm ADM	CD4.naive	0.00305318	0.0217958	0.888609
JHS	adj.DNAm ADM	CD4.naive	0.0799494	0.023869	0.000826814
InChianti	adj.DNAm ADM	CD4.naive	0.100265	0.0327673	0.00227798
FHS test	adj.DNAm ADM	CD4T	0.0669459	0.0399743	0.0944901
WHI BA23	adj.DNAm ADM	CD4T	-0.127023	0.0216193	4.89015e-09
JHS	adj.DNAm ADM	CD4T	-0.00368869	0.0239455	0.877592
InChianti	adj.DNAm ADM	CD4T	0.0300677	0.0329184	0.361269
FHS test	adj.DNAm ADM	CD8.naive	-0.0616598	0.0399879	0.123591
WHI BA23	adj.DNAm ADM	CD8.naive	-0.0956319	0.021696	1.09667e-05
JHS	adj.DNAm ADM	CD8.naive	-0.0559074	0.0239082	0.019478
InChianti	adj.DNAm ADM	CD8.naive	-0.0088495	0.032932	0.788205
FHS test	adj.DNAm ADM	CD8pCD28nCD45RAn	0.0449958	0.0400236	0.261348
WHI BA23	adj.DNAm ADM	CD8pCD28nCD45RAn	0.127865	0.0216169	3.86272e-09
JHS	adj.DNAm ADM	CD8pCD28nCD45RAn	-0.0232891	0.0239392	0.330766
InChianti	adj.DNAm ADM	CD8pCD28nCD45RAn	-0.0128658	0.0329305	0.696112
FHS test	adj.DNAm ADM	CD8T	-0.129876	0.0397248	0.00113718
WHI BA23	adj.DNAm ADM	CD8T	-0.0449409	0.0217738	0.0391415
JHS	adj.DNAm ADM	CD8T	-0.0674018	0.0238912	0.00483869
InChianti	adj.DNAm ADM	CD8T	-0.154838	0.0325361	2.25802e-06
FHS test	adj.DNAm ADM	Gran	0.123903	0.0397554	0.00191349
WHI BA23	adj.DNAm ADM	Gran	0.193196	0.0213852	3.64489e-19
JHS	adj.DNAm ADM	Gran	0.094079	0.0238395	8.24984e-05
InChianti	adj.DNAm ADM	Gran	0.192747	0.0323157	3.49393e-09
FHS test	adj.DNAm ADM	Mono	-0.120152	0.0397739	0.00262378
WHI BA23	adj.DNAm ADM	Mono	-0.0368188	0.0217811	0.0910986
JHS	adj.DNAm ADM	Mono	-0.0390675	0.0239274	0.102702
InChianti	adj.DNAm ADM	Mono	-0.135379	0.0326301	3.64934e-05
FHS test	adj.DNAm ADM	NK	-0.256228	0.0387267	7.94109e-11
WHI BA23	adj.DNAm ADM	NK	-0.10531	0.0216747	1.26886e-06
JHS	adj.DNAm ADM	NK	-0.126866	0.0237522	1.04428e-07
InChianti	adj.DNAm ADM	NK	-0.221204	0.0321174	1.05111e-11
FHS test	adj.DNAm ADM	PlasmaBlast	0.070492	0.0399645	0.0782447
WHI BA23	adj.DNAm ADM	PlasmaBlast	0.184619	0.0214212	1.30879e-17
JHS	adj.DNAm ADM	PlasmaBlast	0.0394656	0.023927	0.0992423
InChianti	adj.DNAm ADM	PlasmaBlast	0.0791599	0.0328299	0.0160942

## Sheet: adj.DNAm B2M
data	var	cell	Correlation	SE	P
FHS test	adj.DNAm B2M	Bcell	-0.0254087	0.0400512	0.526049
WHI BA23	adj.DNAm B2M	Bcell	-0.0641191	0.021751	0.00323493
JHS	adj.DNAm B2M	Bcell	-0.0124804	0.0239438	0.602268
InChianti	adj.DNAm B2M	Bcell	-0.125658	0.0326722	0.000128312
FHS test	adj.DNAm B2M	CD4.naive	-0.15415	0.0395853	0.000109204
WHI BA23	adj.DNAm B2M	CD4.naive	-0.176983	0.0214518	2.75127e-16
JHS	adj.DNAm B2M	CD4.naive	-0.0608679	0.0239013	0.0109618
InChianti	adj.DNAm B2M	CD4.naive	-0.14886	0.0325663	5.51551e-06
FHS test	adj.DNAm B2M	CD4T	-0.236387	0.0389287	2.19287e-09
WHI BA23	adj.DNAm B2M	CD4T	-0.209905	0.0213103	2.07529e-22
JHS	adj.DNAm B2M	CD4T	-0.0656219	0.023894	0.00608778
InChianti	adj.DNAm B2M	CD4T	-0.26679	0.0317396	1.60144e-16
FHS test	adj.DNAm B2M	CD8.naive	-0.268194	0.0385964	9.31647e-12
WHI BA23	adj.DNAm B2M	CD8.naive	-0.238602	0.0211663	1.16485e-28
JHS	adj.DNAm B2M	CD8.naive	-0.122976	0.0237639	2.54379e-07
InChianti	adj.DNAm B2M	CD8.naive	-0.215181	0.0321618	3.8517e-11
FHS test	adj.DNAm B2M	CD8pCD28nCD45RAn	0.21341	0.0391412	7.1749e-08
WHI BA23	adj.DNAm B2M	CD8pCD28nCD45RAn	0.143352	0.0215707	3.83197e-11
JHS	adj.DNAm B2M	CD8pCD28nCD45RAn	0.0613324	0.0239006	0.0103664
InChianti	adj.DNAm B2M	CD8pCD28nCD45RAn	0.200708	0.0322631	7.48446e-10
FHS test	adj.DNAm B2M	CD8T	-0.0373132	0.0400363	0.351705
WHI BA23	adj.DNAm B2M	CD8T	-0.00385576	0.0217957	0.8596
JHS	adj.DNAm B2M	CD8T	-0.0274139	0.0239367	0.252256
InChianti	adj.DNAm B2M	CD8T	-0.0259032	0.0329222	0.431602
FHS test	adj.DNAm B2M	Gran	0.182283	0.0393929	4.50894e-06
WHI BA23	adj.DNAm B2M	Gran	0.160487	0.0215133	1.25908e-13
JHS	adj.DNAm B2M	Gran	0.0466686	0.0239196	0.0512095
InChianti	adj.DNAm B2M	Gran	0.268196	0.0317267	1.09656e-16
FHS test	adj.DNAm B2M	Mono	0.121921	0.0397653	0.00226329
WHI BA23	adj.DNAm B2M	Mono	0.0700331	0.0217423	0.00129671
JHS	adj.DNAm B2M	Mono	0.0341603	0.0239317	0.153641
InChianti	adj.DNAm B2M	Mono	0.116061	0.0327107	0.000407581
FHS test	adj.DNAm B2M	NK	-0.144518	0.0396436	0.000289224
WHI BA23	adj.DNAm B2M	NK	-0.0730309	0.0217377	0.000794341
JHS	adj.DNAm B2M	NK	0.0158662	0.0239426	0.507627
InChianti	adj.DNAm B2M	NK	-0.158123	0.0325189	1.36229e-06
FHS test	adj.DNAm B2M	PlasmaBlast	0.17782	0.0394257	7.73832e-06
WHI BA23	adj.DNAm B2M	PlasmaBlast	0.163937	0.021501	3.67882e-14
JHS	adj.DNAm B2M	PlasmaBlast	0.0443989	0.023922	0.0636244
InChianti	adj.DNAm B2M	PlasmaBlast	0.229187	0.0320566	1.77229e-12

## Sheet: adj.DNAm Cystatin C
data	var	cell	Correlation	SE	P
FHS test	adj.DNAm Cystatin C	Bcell	-0.220705	0.0390762	2.46846e-08
WHI BA23	adj.DNAm Cystatin C	Bcell	-0.176366	0.0214542	3.49827e-16
JHS	adj.DNAm Cystatin C	Bcell	-0.277606	0.0230045	2.91063e-32
InChianti	adj.DNAm Cystatin C	Bcell	-0.25064	0.031882	1.05675e-14
FHS test	adj.DNAm Cystatin C	CD4.naive	-0.167423	0.0394987	2.58866e-05
WHI BA23	adj.DNAm Cystatin C	CD4.naive	-0.233411	0.0211938	1.82687e-27
JHS	adj.DNAm Cystatin C	CD4.naive	-0.18021	0.0235536	3.2759e-14
InChianti	adj.DNAm Cystatin C	CD4.naive	-0.188943	0.0323401	7.13067e-09
FHS test	adj.DNAm Cystatin C	CD4T	-0.304937	0.038156	6.46319e-15
WHI BA23	adj.DNAm Cystatin C	CD4T	-0.341212	0.0204878	1.33864e-58
JHS	adj.DNAm Cystatin C	CD4T	-0.318202	0.022701	2.23056e-42
InChianti	adj.DNAm Cystatin C	CD4T	-0.323561	0.0311617	5.81992e-24
FHS test	adj.DNAm Cystatin C	CD8.naive	-0.177119	0.0394307	8.4139e-06
WHI BA23	adj.DNAm Cystatin C	CD8.naive	-0.216585	0.0212785	8.69623e-24
JHS	adj.DNAm Cystatin C	CD8.naive	-0.149289	0.0236773	3.63914e-10
InChianti	adj.DNAm Cystatin C	CD8.naive	-0.189723	0.0323351	6.16837e-09
FHS test	adj.DNAm Cystatin C	CD8pCD28nCD45RAn	0.189593	0.0393375	1.80875e-06
WHI BA23	adj.DNAm Cystatin C	CD8pCD28nCD45RAn	0.195548	0.0213751	1.32507e-19
JHS	adj.DNAm Cystatin C	CD8pCD28nCD45RAn	0.204166	0.0234413	6.938e-18
InChianti	adj.DNAm Cystatin C	CD8pCD28nCD45RAn	0.207548	0.0322161	1.89183e-10
FHS test	adj.DNAm Cystatin C	CD8T	0.0277448	0.0400487	0.488708
WHI BA23	adj.DNAm Cystatin C	CD8T	0.0146881	0.0217935	0.500406
JHS	adj.DNAm Cystatin C	CD8T	-0.127314	0.0237508	9.41012e-08
InChianti	adj.DNAm Cystatin C	CD8T	0.0332671	0.032915	0.312427
FHS test	adj.DNAm Cystatin C	Gran	0.249859	0.0387934	2.37789e-10
WHI BA23	adj.DNAm Cystatin C	Gran	0.212124	0.0212998	7.31994e-23
JHS	adj.DNAm Cystatin C	Gran	0.3041	0.0228116	1.11622e-38
InChianti	adj.DNAm Cystatin C	Gran	0.191843	0.0323215	4.14475e-09
FHS test	adj.DNAm Cystatin C	Mono	0.121365	0.039768	0.00237127
WHI BA23	adj.DNAm Cystatin C	Mono	0.0642846	0.0217508	0.00315623
JHS	adj.DNAm Cystatin C	Mono	0.147127	0.0236851	6.53404e-10
InChianti	adj.DNAm Cystatin C	Mono	0.0775973	0.0328339	0.0183183
FHS test	adj.DNAm Cystatin C	NK	-0.0890733	0.0399049	0.0259605
WHI BA23	adj.DNAm Cystatin C	NK	-0.0263165	0.0217883	0.227249
JHS	adj.DNAm Cystatin C	NK	-0.0187551	0.0239414	0.433514
InChianti	adj.DNAm Cystatin C	NK	0.0126492	0.0329306	0.700981
FHS test	adj.DNAm Cystatin C	PlasmaBlast	0.227352	0.039015	9.03837e-09
WHI BA23	adj.DNAm Cystatin C	PlasmaBlast	0.140474	0.0215797	9.39495e-11
JHS	adj.DNAm Cystatin C	PlasmaBlast	0.224146	0.0233364	2.53924e-21
InChianti	adj.DNAm Cystatin C	PlasmaBlast	0.148551	0.0325678	5.77029e-06

## Sheet: adj.DNAm GDF-15
data	var	cell	Correlation	SE	P
FHS test	adj.DNAm GDF-15	Bcell	-0.244802	0.0388451	5.5605e-10
WHI BA23	adj.DNAm GDF-15	Bcell	-0.06764	0.0217459	0.00189296
JHS	adj.DNAm GDF-15	Bcell	-0.101275	0.0238225	2.23837e-05
InChianti	adj.DNAm GDF-15	Bcell	-0.14165	0.0326012	1.54787e-05
FHS test	adj.DNAm GDF-15	CD4.naive	-0.0969019	0.0398756	0.0153758
WHI BA23	adj.DNAm GDF-15	CD4.naive	-0.277015	0.0209429	1.99606e-38
JHS	adj.DNAm GDF-15	CD4.naive	-0.126717	0.0237526	1.0811e-07
InChianti	adj.DNAm GDF-15	CD4.naive	-0.162138	0.0324975	7.24375e-07
FHS test	adj.DNAm GDF-15	CD4T	-0.276708	0.0384998	1.89775e-12
WHI BA23	adj.DNAm GDF-15	CD4T	-0.181297	0.0214347	5.00505e-17
JHS	adj.DNAm GDF-15	CD4T	-0.140106	0.0237095	4.12263e-09
InChianti	adj.DNAm GDF-15	CD4T	-0.225588	0.0320843	3.98771e-12
FHS test	adj.DNAm GDF-15	CD8.naive	-0.199714	0.039257	4.81253e-07
WHI BA23	adj.DNAm GDF-15	CD8.naive	-0.286461	0.0208824	4.39476e-41
JHS	adj.DNAm GDF-15	CD8.naive	-0.141832	0.0237036	2.64315e-09
InChianti	adj.DNAm GDF-15	CD8.naive	-0.205156	0.0322327	3.07705e-10
FHS test	adj.DNAm GDF-15	CD8pCD28nCD45RAn	0.297722	0.0382474	2.93433e-14
WHI BA23	adj.DNAm GDF-15	CD8pCD28nCD45RAn	0.174779	0.0214604	6.46447e-16
JHS	adj.DNAm GDF-15	CD8pCD28nCD45RAn	0.118862	0.0237759	6.33305e-07
InChianti	adj.DNAm GDF-15	CD8pCD28nCD45RAn	0.204297	0.0322387	3.65952e-10
FHS test	adj.DNAm GDF-15	CD8T	0.00145382	0.0400641	0.971065
WHI BA23	adj.DNAm GDF-15	CD8T	0.0715679	0.02174	0.00101124
JHS	adj.DNAm GDF-15	CD8T	-0.0510936	0.0239144	0.0327757
InChianti	adj.DNAm GDF-15	CD8T	0.0272724	0.032921	0.407647
FHS test	adj.DNAm GDF-15	Gran	0.32208	0.0379292	1.49497e-16
WHI BA23	adj.DNAm GDF-15	Gran	0.0896614	0.0217081	3.76402e-05
JHS	adj.DNAm GDF-15	Gran	0.119035	0.0237754	6.09804e-07
InChianti	adj.DNAm GDF-15	Gran	0.177378	0.032411	5.71058e-08
FHS test	adj.DNAm GDF-15	Mono	0.0282884	0.0400481	0.480228
WHI BA23	adj.DNAm GDF-15	Mono	0.0116638	0.0217944	0.592586
JHS	adj.DNAm GDF-15	Mono	0.0359242	0.0239302	0.133483
InChianti	adj.DNAm GDF-15	Mono	0.0791291	0.03283	0.0161356
FHS test	adj.DNAm GDF-15	NK	-0.151764	0.0396001	0.000139762
WHI BA23	adj.DNAm GDF-15	NK	0.0403961	0.0217781	0.0637505
JHS	adj.DNAm GDF-15	NK	-0.0072491	0.023945	0.762125
InChianti	adj.DNAm GDF-15	NK	-0.0728245	0.0328458	0.0268551
FHS test	adj.DNAm GDF-15	PlasmaBlast	0.27014	0.0385746	6.50741e-12
WHI BA23	adj.DNAm GDF-15	PlasmaBlast	0.0421466	0.0217765	0.053073
JHS	adj.DNAm GDF-15	PlasmaBlast	0.0453618	0.023921	0.0580831
InChianti	adj.DNAm GDF-15	PlasmaBlast	0.150815	0.0325566	4.13377e-06

## Sheet: adj.DNAm Leptin
data	var	cell	Correlation	SE	P
FHS test	adj.DNAm Leptin	Bcell	0.137088	0.0396859	0.000589092
WHI BA23	adj.DNAm Leptin	Bcell	0.145803	0.0215629	1.75992e-11
JHS	adj.DNAm Leptin	Bcell	0.158682	0.0236423	2.5917e-11
InChianti	adj.DNAm Leptin	Bcell	0.122244	0.0326863	0.000195447
FHS test	adj.DNAm Leptin	CD4.naive	0.209904	0.0391716	1.1824e-07
WHI BA23	adj.DNAm Leptin	CD4.naive	-0.094104	0.0216991	1.51423e-05
JHS	adj.DNAm Leptin	CD4.naive	0.202872	0.0234477	1.12733e-17
InChianti	adj.DNAm Leptin	CD4.naive	0.127468	0.0326646	0.000102202
FHS test	adj.DNAm Leptin	CD4T	0.265807	0.0386229	1.44095e-11
WHI BA23	adj.DNAm Leptin	CD4T	0.119631	0.0216393	3.63281e-08
JHS	adj.DNAm Leptin	CD4T	0.19429	0.0234894	2.59474e-16
InChianti	adj.DNAm Leptin	CD4T	0.178658	0.0324034	4.56599e-08
FHS test	adj.DNAm Leptin	CD8.naive	0.0322103	0.0400434	0.421481
WHI BA23	adj.DNAm Leptin	CD8.naive	-0.0819277	0.0217226	0.000166715
JHS	adj.DNAm Leptin	CD8.naive	0.0721824	0.0238832	0.00254508
InChianti	adj.DNAm Leptin	CD8.naive	0.100461	0.0327666	0.00223305
FHS test	adj.DNAm Leptin	CD8pCD28nCD45RAn	-0.0562646	0.0400007	0.160047
WHI BA23	adj.DNAm Leptin	CD8pCD28nCD45RAn	0.0131315	0.021794	0.546887
JHS	adj.DNAm Leptin	CD8pCD28nCD45RAn	-0.133192	0.0237323	2.31839e-08
InChianti	adj.DNAm Leptin	CD8pCD28nCD45RAn	-0.169202	0.0324584	2.29523e-07
FHS test	adj.DNAm Leptin	CD8T	0.0108473	0.0400618	0.786663
WHI BA23	adj.DNAm Leptin	CD8T	0.011128	0.0217945	0.609695
JHS	adj.DNAm Leptin	CD8T	0.0868302	0.0238552	0.000280711
InChianti	adj.DNAm Leptin	CD8T	0.0164697	0.0329288	0.61708
FHS test	adj.DNAm Leptin	Gran	-0.120483	0.0397723	0.00255246
WHI BA23	adj.DNAm Leptin	Gran	-0.109153	0.0216656	5.10301e-07
JHS	adj.DNAm Leptin	Gran	-0.149845	0.0236753	3.12669e-10
InChianti	adj.DNAm Leptin	Gran	-0.0312569	0.0329172	0.342583
FHS test	adj.DNAm Leptin	Mono	-0.222139	0.0390632	1.9928e-08
WHI BA23	adj.DNAm Leptin	Mono	-0.0754339	0.0217338	0.000529334
JHS	adj.DNAm Leptin	Mono	-0.148043	0.0236818	5.10458e-10
InChianti	adj.DNAm Leptin	Mono	-0.269927	0.0317108	6.86006e-17
FHS test	adj.DNAm Leptin	NK	-0.0865913	0.0399137	0.0304249
WHI BA23	adj.DNAm Leptin	NK	0.192627	0.0213877	4.64692e-19
JHS	adj.DNAm Leptin	NK	-0.0686069	0.0238892	0.00412973
InChianti	adj.DNAm Leptin	NK	-0.0722458	0.0328472	0.0280934
FHS test	adj.DNAm Leptin	PlasmaBlast	-0.216229	0.0391163	4.77164e-08
WHI BA23	adj.DNAm Leptin	PlasmaBlast	-0.071556	0.02174	0.00101321
JHS	adj.DNAm Leptin	PlasmaBlast	-0.209653	0.0234135	8.54361e-19
InChianti	adj.DNAm Leptin	PlasmaBlast	-0.188014	0.0323459	8.46935e-09

## Sheet: adj.DNAm PAI-1
data	var	cell	Correlation	SE	P
FHS test	adj.DNAm PAI-1	Bcell	-0.270505	0.0385705	6.08195e-12
WHI BA23	adj.DNAm PAI-1	Bcell	-0.0427124	0.021776	0.0499586
JHS	adj.DNAm PAI-1	Bcell	-0.170722	0.0235941	6.90473e-13
InChianti	adj.DNAm PAI-1	Bcell	-0.0992867	0.0327705	0.00251577
FHS test	adj.DNAm PAI-1	CD4.naive	0.00839617	0.0400627	0.834067
WHI BA23	adj.DNAm PAI-1	CD4.naive	-0.077729	0.0217299	0.000355339
JHS	adj.DNAm PAI-1	CD4.naive	-0.0779301	0.0238728	0.00111827
InChianti	adj.DNAm PAI-1	CD4.naive	-0.0442173	0.032901	0.179295
FHS test	adj.DNAm PAI-1	CD4T	-0.0840037	0.0399225	0.0357639
WHI BA23	adj.DNAm PAI-1	CD4T	-0.0901474	0.0217071	3.41396e-05
JHS	adj.DNAm PAI-1	CD4T	-0.122349	0.0237658	2.92861e-07
InChianti	adj.DNAm PAI-1	CD4T	-0.121365	0.0326898	0.000217415
FHS test	adj.DNAm PAI-1	CD8.naive	-0.00283591	0.040064	0.943592
WHI BA23	adj.DNAm PAI-1	CD8.naive	-0.107283	0.0216701	7.98005e-07
JHS	adj.DNAm PAI-1	CD8.naive	-0.0683709	0.0238896	0.00426065
InChianti	adj.DNAm PAI-1	CD8.naive	-0.123456	0.0326813	0.000168514
FHS test	adj.DNAm PAI-1	CD8pCD28nCD45RAn	0.123866	0.0397556	0.00191961
WHI BA23	adj.DNAm PAI-1	CD8pCD28nCD45RAn	0.0766954	0.0217317	0.000425759
JHS	adj.DNAm PAI-1	CD8pCD28nCD45RAn	0.103805	0.0238163	1.38543e-05
InChianti	adj.DNAm PAI-1	CD8pCD28nCD45RAn	0.110249	0.0327325	0.000788018
FHS test	adj.DNAm PAI-1	CD8T	-0.0846998	0.0399202	0.0342546
WHI BA23	adj.DNAm PAI-1	CD8T	-0.0862965	0.0217145	7.30159e-05
JHS	adj.DNAm PAI-1	CD8T	-0.0579383	0.0239054	0.0154668
InChianti	adj.DNAm PAI-1	CD8T	-0.107802	0.0327413	0.00103058
FHS test	adj.DNAm PAI-1	Gran	0.19609	0.0392863	7.79341e-07
WHI BA23	adj.DNAm PAI-1	Gran	0.180774	0.0214368	6.16841e-17
JHS	adj.DNAm PAI-1	Gran	0.146133	0.0236886	8.52848e-10
InChianti	adj.DNAm PAI-1	Gran	0.13571	0.0326286	3.49116e-05
FHS test	adj.DNAm PAI-1	Mono	0.15042	0.0396083	0.000160356
WHI BA23	adj.DNAm PAI-1	Mono	-0.0424765	0.0217762	0.0512381
JHS	adj.DNAm PAI-1	Mono	0.0885917	0.0238515	0.000210177
InChianti	adj.DNAm PAI-1	Mono	0.14033	0.0326074	1.85973e-05
FHS test	adj.DNAm PAI-1	NK	-0.0770081	0.0399452	0.0543288
WHI BA23	adj.DNAm PAI-1	NK	-0.00641587	0.0217954	0.768506
JHS	adj.DNAm PAI-1	NK	-0.0189698	0.0239413	0.428267
InChianti	adj.DNAm PAI-1	NK	-0.0312188	0.0329172	0.343173
FHS test	adj.DNAm PAI-1	PlasmaBlast	0.213059	0.0391443	7.54556e-08
WHI BA23	adj.DNAm PAI-1	PlasmaBlast	0.162643	0.0215056	5.85446e-14
JHS	adj.DNAm PAI-1	PlasmaBlast	0.155587	0.0236541	6.3006e-11
InChianti	adj.DNAm PAI-1	PlasmaBlast	0.189268	0.032338	6.71346e-09

## Sheet: adj.DNAm TIMP-1
data	var	cell	Correlation	SE	P
FHS test	adj.DNAm TIMP-1	Bcell	-0.371672	0.0371941	6.58729e-22
WHI BA23	adj.DNAm TIMP-1	Bcell	-0.192301	0.0213891	5.33862e-19
JHS	adj.DNAm TIMP-1	Bcell	-0.204296	0.0234406	6.60679e-18
InChianti	adj.DNAm TIMP-1	Bcell	-0.324752	0.0311482	3.89673e-24
FHS test	adj.DNAm TIMP-1	CD4.naive	-0.140951	0.0396642	0.000408746
WHI BA23	adj.DNAm TIMP-1	CD4.naive	-0.148308	0.0215548	7.83874e-12
JHS	adj.DNAm TIMP-1	CD4.naive	-0.123982	0.0237609	2.02558e-07
InChianti	adj.DNAm TIMP-1	CD4.naive	-0.166227	0.0324751	3.74659e-07
FHS test	adj.DNAm TIMP-1	CD4T	-0.331562	0.0377979	1.67331e-17
WHI BA23	adj.DNAm TIMP-1	CD4T	-0.284804	0.0208932	1.30763e-40
JHS	adj.DNAm TIMP-1	CD4T	-0.233962	0.0232811	3.88267e-23
InChianti	adj.DNAm TIMP-1	CD4T	-0.355278	0.0307847	7.10325e-29
FHS test	adj.DNAm TIMP-1	CD8.naive	-0.0649876	0.0399795	0.104557
WHI BA23	adj.DNAm TIMP-1	CD8.naive	-0.1689	0.0214827	5.97908e-15
JHS	adj.DNAm TIMP-1	CD8.naive	-0.0985972	0.023829	3.67515e-05
InChianti	adj.DNAm TIMP-1	CD8.naive	-0.118896	0.0326996	0.000292251
FHS test	adj.DNAm TIMP-1	CD8pCD28nCD45RAn	0.21026	0.0391685	1.12433e-07
WHI BA23	adj.DNAm TIMP-1	CD8pCD28nCD45RAn	0.132333	0.0216042	1.07685e-09
JHS	adj.DNAm TIMP-1	CD8pCD28nCD45RAn	0.131555	0.0237375	3.44624e-08
InChianti	adj.DNAm TIMP-1	CD8pCD28nCD45RAn	0.130906	0.0326499	6.57997e-05
FHS test	adj.DNAm TIMP-1	CD8T	-0.16146	0.0395385	5.01242e-05
WHI BA23	adj.DNAm TIMP-1	CD8T	-0.100005	0.0216866	4.24011e-06
JHS	adj.DNAm TIMP-1	CD8T	-0.148906	0.0236787	4.03978e-10
InChianti	adj.DNAm TIMP-1	CD8T	-0.206208	0.0322255	2.48659e-10
FHS test	adj.DNAm TIMP-1	Gran	0.467045	0.0354261	3.49947e-35
WHI BA23	adj.DNAm TIMP-1	Gran	0.335803	0.0205302	1.05696e-56
JHS	adj.DNAm TIMP-1	Gran	0.281188	0.0229795	4.32816e-33
InChianti	adj.DNAm TIMP-1	Gran	0.440029	0.0295735	4.86888e-45
FHS test	adj.DNAm TIMP-1	Mono	0.113288	0.0398062	0.00457318
WHI BA23	adj.DNAm TIMP-1	Mono	0.0503255	0.0217682	0.0208804
JHS	adj.DNAm TIMP-1	Mono	0.0862546	0.0238564	0.0003082
InChianti	adj.DNAm TIMP-1	Mono	0.109686	0.0327345	0.000838608
FHS test	adj.DNAm TIMP-1	NK	-0.200411	0.0392513	4.3816e-07
WHI BA23	adj.DNAm TIMP-1	NK	-0.115981	0.0216488	9.36594e-08
JHS	adj.DNAm TIMP-1	NK	-0.0783517	0.023872	0.00105053
InChianti	adj.DNAm TIMP-1	NK	-0.142662	0.0325964	1.34308e-05
FHS test	adj.DNAm TIMP-1	PlasmaBlast	0.40904	0.0365592	1.31626e-26
WHI BA23	adj.DNAm TIMP-1	PlasmaBlast	0.310676	0.0207173	2.24114e-48
JHS	adj.DNAm TIMP-1	PlasmaBlast	0.221863	0.0233489	6.52801e-21
InChianti	adj.DNAm TIMP-1	PlasmaBlast	0.391012	0.0303113	4.02519e-35

## Sheet: adj.DNAm PACKYRS
data	var	cell	Correlation	SE	P
FHS test	adj.DNAm PACKYRS	Bcell	-0.13292	0.0397087	0.000864934
WHI BA23	adj.DNAm PACKYRS	Bcell	0.0310873	0.0217853	0.153733
JHS	adj.DNAm PACKYRS	Bcell	-0.0793021	0.0238702	0.000911514
InChianti	adj.DNAm PACKYRS	Bcell	-0.069291	0.0328541	0.0352093
FHS test	adj.DNAm PACKYRS	CD4.naive	0.0339454	0.0400411	0.396894
WHI BA23	adj.DNAm PACKYRS	CD4.naive	0.0339651	0.0217833	0.119093
JHS	adj.DNAm PACKYRS	CD4.naive	-0.0374987	0.0239288	0.117275
InChianti	adj.DNAm PACKYRS	CD4.naive	0.0156904	0.0329292	0.633838
FHS test	adj.DNAm PACKYRS	CD4T	-0.143108	0.0396518	0.000331925
WHI BA23	adj.DNAm PACKYRS	CD4T	0.028993	0.0217867	0.183409
JHS	adj.DNAm PACKYRS	CD4T	-0.0801115	0.0238687	0.000806771
InChianti	adj.DNAm PACKYRS	CD4T	-0.074259	0.0328423	0.0239869
FHS test	adj.DNAm PACKYRS	CD8.naive	-0.0958796	0.0398796	0.0164976
WHI BA23	adj.DNAm PACKYRS	CD8.naive	-0.126063	0.021622	6.38637e-09
JHS	adj.DNAm PACKYRS	CD8.naive	-0.153289	0.0236627	1.20504e-10
InChianti	adj.DNAm PACKYRS	CD8.naive	-0.157075	0.0325244	1.60233e-06
FHS test	adj.DNAm PACKYRS	CD8pCD28nCD45RAn	0.185667	0.0393675	2.96719e-06
WHI BA23	adj.DNAm PACKYRS	CD8pCD28nCD45RAn	0.0111656	0.0217945	0.608485
JHS	adj.DNAm PACKYRS	CD8pCD28nCD45RAn	0.0873985	0.023854	0.000255838
InChianti	adj.DNAm PACKYRS	CD8pCD28nCD45RAn	0.121641	0.0326887	0.000210276
FHS test	adj.DNAm PACKYRS	CD8T	-0.00854872	0.0400627	0.831098
WHI BA23	adj.DNAm PACKYRS	CD8T	0.089007	0.0217093	4.28958e-05
JHS	adj.DNAm PACKYRS	CD8T	-0.0111263	0.0239442	0.64222
InChianti	adj.DNAm PACKYRS	CD8T	-0.0467808	0.0328972	0.155356
FHS test	adj.DNAm PACKYRS	Gran	0.21482	0.0391288	5.85462e-08
WHI BA23	adj.DNAm PACKYRS	Gran	-0.0315143	0.021785	0.148157
JHS	adj.DNAm PACKYRS	Gran	0.101664	0.0238216	2.08065e-05
InChianti	adj.DNAm PACKYRS	Gran	0.0986335	0.0327727	0.00268687
FHS test	adj.DNAm PACKYRS	Mono	-0.0264703	0.0400501	0.508902
WHI BA23	adj.DNAm PACKYRS	Mono	-0.0212796	0.0217909	0.328911
JHS	adj.DNAm PACKYRS	Mono	0.0559642	0.0239081	0.0193546
InChianti	adj.DNAm PACKYRS	Mono	0.133299	0.0326393	4.81151e-05
FHS test	adj.DNAm PACKYRS	NK	-0.192171	0.0393174	1.29949e-06
WHI BA23	adj.DNAm PACKYRS	NK	-0.0709136	0.021741	0.00112497
JHS	adj.DNAm PACKYRS	NK	-0.13074	0.0237401	4.19021e-08
InChianti	adj.DNAm PACKYRS	NK	-0.110364	0.0327321	0.000777996
FHS test	adj.DNAm PACKYRS	PlasmaBlast	0.158779	0.0395559	6.69593e-05
WHI BA23	adj.DNAm PACKYRS	PlasmaBlast	-0.0518664	0.0217665	0.0172674
JHS	adj.DNAm PACKYRS	PlasmaBlast	0.0888723	0.0238509	0.000200612
InChianti	adj.DNAm PACKYRS	PlasmaBlast	0.187644	0.0323483	9.0686e-09
