# Supplementary material for: DNA methylation GrimAge strongly predicts lifespan and healthspan
Source: Aging (Albany NY). 2019 Jan 21;11(2):303–27. doi: 10.18632/aging.101684 (PMC6366976; doi:10.18632/aging.101684)
Supplement: Supplementary Data 3 [file aging-11-101684-s010.xlsx]

## Sheet: Summary
Name	Abbreviation	Number of CpGs (underlying the surrogate)	Number of highlighted gene set (Binomial FDR < 0.05)	Number of highlighted gene set (Binomial Bonferroni < 0.05)
DNAm GrimAge	DNAmGrimAge	1030	361	28
DNAm Adrenomedullin	adm	186	7	2
DNAm Beta-2-microglobulin	B2M	91	388	75
DNAm Cystatin-C	Cystatin_C	87	153	4
DNAm Growth differentiation factor 15	GDF_15	137	4	2
DNAm Leptin	leptin	187	13	4
DNAm Plasminogen activator inhibitor 1	pai_1	211	307	8
DNAm Tissue Inhibitor Metalloproteinases 1	TIMP_1	42	6	0
DNAm Pack years	PACKYRS	172	7	5
The following sheets 2-9 list the (1) gene sets at FDR <0.05 based on the 1030 CpGs (underlying DNAm GrimAge), and the CpGs sets underlying each DNAm surrogates. The last sheet lists the all the highlighted genes sets (column name: ID) with the number of frequency occuring (column name : ID.count), order by ID.count

## Sheet: DNAmGrimAge
DNAm	Database	ID	Desc	GeneSetSize	GeneSetCov	BinomP	Binom.FDR	Binom.Bon	RegionFoldEnrich	ExpRegions	ObsRegions	GenomeFrac	SetCov	HyperRank	HyperP	Hyper.FDR	Hyper.Bon	GeneFoldEnrich	ExpGenes	ObsGenes	TermCov
DNAm GrimAge	GO Molecular Function	GO:0032395	MHC class II receptor activity	12	0.00201884	1.2e-06	2.0e-04	2.0e-04	18.6525	0.321672	6	0.000312303	0.00582524	156	7.0e-02	2.0e-01	1.2e+01	3.03516	0.988415	3	0.25
DNAm GrimAge	GO Molecular Function	GO:0008641	small protein activating enzyme activity	10	0.00134589	4.8e-05	4.2e-03	8.5e-03	13.1169	0.381186	5	0.000370084	0.00485437	512	2.0e-01	2.9e-01	3.4e+01	2.42813	0.823679	2	0.2
DNAm GrimAge	GO Molecular Function	GO:0042605	peptide antigen binding	22	0.00269179	4.3e-04	2.5e-02	7.5e-02	6.38192	0.940156	6	0.000912773	0.00582524	317	1.0e-01	2.1e-01	1.8e+01	2.20739	1.8121	4	0.181818
DNAm GrimAge	GO Molecular Function	GO:0003823	antigen binding	56	0.00538358	7.8e-04	3.4e-02	1.4e-01	3.79135	2.37383	9	0.00230469	0.00873786	301	8.7e-02	2.1e-01	1.5e+01	1.73438	4.61261	8	0.142857
DNAm GrimAge	GO Biological Process	GO:0032365	intracellular lipid transport	19	0.00336474	9.1e-06	2.5e-03	2.5e-03	6.90421	1.30355	9	0.00126559	0.00873786	577	1.6e-02	4.4e-02	1.9e+01	3.19491	1.56499	5	0.263158
DNAm GrimAge	GO Biological Process	GO:0033233	regulation of protein sumoylation	16	0.00269179	4.4e-05	3.2e-03	1.2e-02	5.63157	1.59813	9	0.00155159	0.00873786	864	3.7e-02	7.5e-02	5.4e+01	3.03516	1.31789	4	0.25
DNAm GrimAge	GO Biological Process	GO:0033235	positive regulation of protein sumoylation	10	0.00201884	5.7e-05	3.2e-03	1.6e-02	7.42845	0.942323	7	0.000914877	0.00679612	911	4.3e-02	8.1e-02	2.8e+01	3.64219	0.823679	3	0.3
DNAm GrimAge	GO Biological Process	GO:0001706	endoderm formation	28	0.00605653	5.9e-05	3.2e-03	1.6e-02	3.22748	4.95742	16	0.00481303	0.015534	135	2.8e-04	2.5e-03	2.4e+01	3.90235	2.3063	9	0.321429
DNAm GrimAge	GO Biological Process	GO:0040029	regulation of gene expression, epigenetic	134	0.0154778	6.7e-05	3.2e-03	1.8e-02	2.33313	11.5724	27	0.0112354	0.0262136	158	5.8e-04	4.4e-03	6.5e+00	2.08384	11.0373	23	0.171642
DNAm GrimAge	GO Biological Process	GO:0019221	cytokine-mediated signaling pathway	321	0.025572	6.9e-05	3.2e-03	1.9e-02	1.87267	24.0298	45	0.0233299	0.0436893	542	1.5e-02	4.2e-02	1.0e-01	1.43721	26.4401	38	0.11838
DNAm GrimAge	GO Biological Process	GO:1902001	fatty acid transmembrane transport	11	0.00201884	9.5e-05	3.8e-03	2.6e-02	8.46627	0.708695	6	0.000688053	0.00582524	1006	5.6e-02	9.1e-02	1.4e+01	3.31108	0.906047	3	0.272727
DNAm GrimAge	GO Biological Process	GO:0002474	antigen processing and presentation of peptide antigen via MHC class I	100	0.00874832	1.3e-04	4.6e-03	3.7e-02	3.00473	5.32494	16	0.00516985	0.015534	1122	6.7e-02	1.0e-01	1.8e+01	1.57828	8.23679	13	0.13
DNAm GrimAge	GO Biological Process	GO:0034341	response to interferon-gamma	100	0.0100942	0.00015	4.6e-03	4.2e-02	2.4571	8.95364	22	0.00869285	0.0213592	588	1.7e-02	4.4e-02	1.0e+01	1.8211	8.23679	15	0.15
DNAm GrimAge	GO Biological Process	GO:0042590	antigen processing and presentation of exogenous peptide antigen via MHC class I	78	0.00672948	2.0e-04	4.6e-03	5.6e-02	3.34412	3.88742	13	0.0037742	0.0126214	1623	1.1e-01	1.4e-01	1.8e+01	1.55649	6.4247	10	0.128205
DNAm GrimAge	GO Biological Process	GO:0015879	carnitine transport	13	0.00201884	2.1e-04	4.6e-03	5.9e-02	7.27684	0.824533	6	0.000800518	0.00582524	1495	8.6e-02	1.2e-01	2.5e+01	2.80169	1.07078	3	0.230769
DNAm GrimAge	GO Biological Process	GO:0002376	immune system process	1789	0.125168	2.7e-04	4.6e-03	7.4e-02	1.26387	158.244	200	0.153635	0.194175	143	3.9e-04	3.3e-03	2.8e+01	1.26225	147.356	186	0.103969
DNAm GrimAge	GO Biological Process	GO:0060337	type I interferon-mediated signaling pathway	64	0.00403769	2.8e-04	4.6e-03	7.8e-02	3.66986	2.99739	11	0.00291009	0.0106796	3964	4.3e-01	4.4e-01	3.2e+01	1.13819	5.27155	6	0.09375
DNAm GrimAge	GO Biological Process	GO:0060968	regulation of gene silencing	31	0.00336474	2.8e-04	4.6e-03	7.8e-02	4.37978	2.0549	9	0.00199504	0.00873786	1626	1.1e-01	1.4e-01	1.0e+01	1.95817	2.55341	5	0.16129
DNAm GrimAge	GO Biological Process	GO:0045668	negative regulation of osteoblast differentiation	33	0.00807537	2.8e-04	4.6e-03	7.8e-02	2.92268	5.13228	15	0.00498279	0.0145631	51	6.4e-06	3.2e-04	2.6e+00	4.41478	2.71814	12	0.363636
DNAm GrimAge	GO Biological Process	GO:0071357	cellular response to type I interferon	65	0.00403769	2.8e-04	4.6e-03	7.8e-02	3.66722	2.99955	11	0.00291219	0.0106796	4017	4.5e-01	4.6e-01	3.6e+00	1.12068	5.35392	6	0.0923077
DNAm GrimAge	GO Biological Process	GO:0019882	antigen processing and presentation	207	0.0174966	3.0e-04	4.6e-03	8.3e-02	2.1196	12.7382	27	0.0123672	0.0262136	651	2.0e-02	5.1e-02	1.3e+00	1.52491	17.0502	26	0.125604
DNAm GrimAge	GO Biological Process	GO:0071158	positive regulation of cell cycle arrest	83	0.00874832	3.0e-04	4.6e-03	8.4e-02	2.78747	5.73996	16	0.00557278	0.015534	602	1.8e-02	4.6e-02	3.6e+00	1.90155	6.83654	13	0.156627
DNAm GrimAge	GO Biological Process	GO:0034340	response to type I interferon	66	0.00403769	3.1e-04	4.6e-03	8.7e-02	3.62329	3.03592	11	0.00294749	0.0106796	4173	4.6e-01	4.7e-01	1.0e+01	1.1037	5.43628	6	0.0909091
DNAm GrimAge	GO Biological Process	GO:0042789	mRNA transcription from RNA polymerase II promoter	12	0.00201884	4.8e-04	6.3e-03	1.3e-01	7.94904	0.629007	5	0.000610686	0.00485437	1135	7.0e-02	1.1e-01	3.0e-04	3.03516	0.988415	3	0.25
DNAm GrimAge	GO Biological Process	GO:0002479	antigen processing and presentation of exogenous peptide antigen via MHC class I, TAP-dependent	74	0.00605653	4.9e-04	6.3e-03	1.3e-01	3.21729	3.72985	12	0.00362121	0.0116505	1903	1.5e-01	1.9e-01	5.6e+00	1.47656	6.09523	9	0.121622
DNAm GrimAge	GO Biological Process	GO:0060976	coronary vasculature development	13	0.00471063	5.0e-04	6.3e-03	1.4e-01	4.50997	1.77385	8	0.00172218	0.00776699	74	2.8e-05	7.1e-04	7.5e-04	6.53727	1.07078	7	0.538462
DNAm GrimAge	GO Biological Process	GO:0007492	endoderm development	51	0.00874832	5.9e-04	6.9e-03	1.6e-01	2.32313	8.60909	20	0.00835834	0.0194175	119	1.9e-04	2.0e-03	1.3e+01	3.09467	4.20076	13	0.254902
DNAm GrimAge	GO Biological Process	GO:0048821	erythrocyte development	24	0.00471063	6.0e-04	6.9e-03	1.6e-01	4.3914	1.82174	8	0.00176868	0.00776699	253	2.5e-03	1.3e-02	3.8e-01	3.54102	1.97683	7	0.291667
DNAm GrimAge	GO Biological Process	GO:0071156	regulation of cell cycle arrest	98	0.00942126	6.9e-04	7.6e-03	1.9e-01	2.494	6.81637	17	0.00661783	0.0165049	749	3.0e-02	6.7e-02	6.8e+01	1.73438	8.07206	14	0.142857
DNAm GrimAge	GO Biological Process	GO:0043067	regulation of programmed cell death	1171	0.0942126	7.2e-04	7.7e-03	2.0e-01	1.27996	125.004	160	0.121363	0.15534	42	3.5e-06	2.4e-04	3.7e+00	1.45149	96.4529	140	0.119556
DNAm GrimAge	GO Biological Process	GO:0021521	ventral spinal cord interneuron specification	10	0.00336474	7.7e-04	7.9e-03	2.1e-01	3.80171	2.36735	9	0.0022984	0.00873786	162	6.7e-04	4.8e-03	9.7e-05	6.07032	0.823679	5	0.5
DNAm GrimAge	GO Biological Process	GO:0042981	regulation of apoptotic process	1159	0.0921938	8.3e-04	8.2e-03	2.3e-01	1.27813	123.618	158	0.120017	0.153398	55	8.1e-06	3.2e-04	2.1e+01	1.43509	95.4644	137	0.118205
DNAm GrimAge	GO Biological Process	GO:0006955	immune response	1110	0.0753701	9.7e-04	9.1e-03	2.7e-01	1.32957	90.2551	120	0.0876263	0.116505	524	1.4e-02	3.8e-02	6.9e+01	1.225	91.4284	112	0.100901
DNAm GrimAge	GO Biological Process	GO:0002478	antigen processing and presentation of exogenous peptide antigen	164	0.013459	1.0e-03	9.1e-03	2.8e-01	2.12177	10.3687	22	0.0100667	0.0213592	962	5.0e-02	8.9e-02	1.3e+02	1.48057	13.5083	20	0.121951
DNAm GrimAge	GO Biological Process	GO:0060579	ventral spinal cord interneuron fate commitment	11	0.00336474	1.0e-03	9.1e-03	2.9e-01	3.63711	2.47449	9	0.00240242	0.00873786	189	1.1e-03	7.5e-03	2.7e+01	5.51847	0.906047	5	0.454545
DNAm GrimAge	GO Biological Process	GO:0048002	antigen processing and presentation of peptide antigen	181	0.0148048	1.1e-03	9.1e-03	2.9e-01	2.04083	11.7599	24	0.0114174	0.023301	899	4.2e-02	8.1e-02	2.6e+01	1.47566	14.9086	22	0.121547
DNAm GrimAge	GO Biological Process	GO:0060711	labyrinthine layer development	42	0.00471063	1.1e-03	9.5e-03	3.1e-01	2.64861	5.28579	14	0.00513184	0.0135922	989	5.4e-02	9.1e-02	1.5e+01	2.02344	3.45945	7	0.166667
DNAm GrimAge	GO Biological Process	GO:0006595	polyamine metabolic process	20	0.00336474	1.2e-03	9.8e-03	3.3e-01	5.2069	1.15232	6	0.00111875	0.00582524	655	2.1e-02	5.1e-02	1.9e+01	3.03516	1.64736	5	0.25
DNAm GrimAge	GO Biological Process	GO:0015697	quaternary ammonium group transport	18	0.00201884	1.2e-03	9.8e-03	3.4e-01	5.18051	1.15819	6	0.00112445	0.00582524	2305	1.8e-01	2.1e-01	4.3e+01	2.02344	1.48262	3	0.166667
DNAm GrimAge	GO Biological Process	GO:0051258	protein polymerization	60	0.00605653	1.3e-03	9.8e-03	3.6e-01	2.50959	5.97708	15	0.00580299	0.0145631	1020	5.6e-02	9.1e-02	1.9e+01	1.8211	4.94208	9	0.15
DNAm GrimAge	GO Biological Process	GO:0042755	eating behavior	23	0.00471063	1.3e-03	9.8e-03	3.6e-01	3.515	2.56045	9	0.00248588	0.00873786	218	1.9e-03	1.1e-02	6.8e+00	3.69498	1.89446	7	0.304348
DNAm GrimAge	GO Biological Process	GO:0035987	endodermal cell differentiation	16	0.00336474	1.3e-03	9.8e-03	3.7e-01	3.50333	2.56899	9	0.00249416	0.00873786	411	7.6e-03	2.6e-02	1.2e+01	3.79395	1.31789	5	0.3125
DNAm GrimAge	GO Biological Process	GO:0060333	interferon-gamma-mediated signaling pathway	61	0.00538358	1.5e-03	1.1e-02	4.1e-01	2.68411	4.84333	13	0.00470226	0.0126214	1758	1.3e-01	1.6e-01	3.7e+00	1.59222	5.02444	8	0.131148
DNAm GrimAge	GO Biological Process	GO:0014823	response to activity	35	0.00605653	1.5e-03	1.1e-02	4.3e-01	2.96995	3.70376	11	0.00359589	0.0106796	208	1.7e-03	1.0e-02	6.0e+01	3.12188	2.88288	9	0.257143
DNAm GrimAge	GO Biological Process	GO:0019884	antigen processing and presentation of exogenous antigen	171	0.013459	1.6e-03	1.1e-02	4.4e-01	2.04812	10.7416	22	0.0104287	0.0213592	1163	7.0e-02	1.1e-01	6.8e+01	1.41996	14.0849	20	0.116959
DNAm GrimAge	GO Biological Process	GO:0009299	mRNA transcription	16	0.00201884	1.6e-03	1.1e-02	4.5e-01	6.03966	0.827862	5	0.000803749	0.00485437	1853	1.4e-01	1.7e-01	6.8e+01	2.27637	1.31789	3	0.1875
DNAm GrimAge	GO Biological Process	GO:0010745	negative regulation of macrophage derived foam cell differentiation	13	0.00269179	1.8e-03	1.1e-02	4.9e-01	5.92732	0.843551	5	0.000818982	0.00485437	605	1.8e-02	4.6e-02	5.2e+00	3.73558	1.07078	4	0.307692
DNAm GrimAge	GO Biological Process	GO:0070206	protein trimerization	32	0.00538358	1.9e-03	1.2e-02	5.1e-01	3.6631	2.18394	8	0.00212033	0.00776699	287	3.6e-03	1.6e-02	2.4e+01	3.03516	2.63577	8	0.25
DNAm GrimAge	GO Biological Process	GO:0010941	regulation of cell death	1210	0.0955586	2.0e-03	1.2e-02	5.5e-01	1.24641	129.973	162	0.126188	0.157282	54	8.0e-06	3.2e-04	6.3e+01	1.42477	99.6652	142	0.117355
DNAm GrimAge	GO Biological Process	GO:0071345	cellular response to cytokine stimulus	435	0.0316285	2.2e-03	1.3e-02	6.0e-01	1.51209	35.7122	54	0.0346721	0.0524272	810	3.3e-02	7.2e-02	1.8e+02	1.31175	35.83	47	0.108046
DNAm GrimAge	GO Biological Process	GO:0032107	regulation of response to nutrient levels	39	0.00538358	2.3e-03	1.3e-02	6.3e-01	3.00623	3.32642	10	0.00322954	0.00970874	509	1.3e-02	3.8e-02	2.4e+01	2.49039	3.21235	8	0.205128
DNAm GrimAge	GO Biological Process	GO:0061515	myeloid cell development	31	0.00538358	2.3e-03	1.3e-02	6.4e-01	3.22855	2.78763	9	0.00270643	0.00873786	267	2.9e-03	1.4e-02	4.5e+01	3.13307	2.55341	8	0.258064
DNAm GrimAge	GO Biological Process	GO:0060669	embryonic placenta morphogenesis	20	0.00269179	2.6e-03	1.5e-02	7.2e-01	3.17402	2.83552	9	0.00275293	0.00873786	1194	7.7e-02	1.1e-01	4.4e+01	2.42813	1.64736	4	0.2
DNAm GrimAge	GO Biological Process	GO:0043467	regulation of generation of precursor metabolites and energy	60	0.00807537	2.7e-03	1.5e-02	7.4e-01	2.32477	6.45225	15	0.00626432	0.0145631	275	3.2e-03	1.5e-02	9.1e+00	2.42813	4.94208	12	0.2
DNAm GrimAge	GO Biological Process	GO:0034097	response to cytokine stimulus	525	0.0376851	2.8e-03	1.5e-02	7.8e-01	1.42987	46.158	66	0.0448136	0.0640777	731	2.7e-02	6.3e-02	3.9e+01	1.295	43.2432	56	0.106667
DNAm GrimAge	GO Biological Process	GO:0032446	protein modification by small protein conjugation	546	0.0363392	2.8e-03	1.5e-02	7.8e-01	1.41689	48.6981	69	0.0472797	0.0669903	1543	9.1e-02	1.3e-01	2.8e+01	1.20072	44.9729	54	0.0989011
DNAm GrimAge	GO Biological Process	GO:0044773	mitotic DNA damage checkpoint	82	0.00672948	2.9e-03	1.5e-02	8.0e-01	2.38668	5.86588	14	0.00569503	0.0135922	1801	1.4e-01	1.7e-01	1.2e+01	1.48057	6.75417	10	0.121951
DNAm GrimAge	GO Biological Process	GO:0046907	intracellular transport	1098	0.0666218	3.0e-03	1.5e-02	8.3e-01	1.29071	90.6479	117	0.0880077	0.113592	2302	1.8e-01	2.1e-01	1.1e+02	1.09465	90.44	99	0.0901639
DNAm GrimAge	GO Biological Process	GO:0043069	negative regulation of programmed cell death	664	0.0572005	3.2e-03	1.6e-02	8.7e-01	1.32456	73.987	98	0.0718321	0.0951456	76	2.8e-05	7.1e-04	5.9e+01	1.55415	54.6923	85	0.128012
DNAm GrimAge	GO Biological Process	GO:0009451	RNA modification	78	0.00672948	3.2e-03	1.6e-02	8.8e-01	2.56461	4.67908	12	0.00454279	0.0116505	1623	1.1e-01	1.4e-01	2.0e+01	1.55649	6.4247	10	0.128205
DNAm GrimAge	GO Biological Process	GO:0044774	mitotic DNA integrity checkpoint	85	0.00672948	3.3e-03	1.6e-02	9.0e-01	2.35492	5.94501	14	0.00577186	0.0135922	2188	1.6e-01	1.9e-01	5.1e+01	1.42831	7.00127	10	0.117647
DNAm GrimAge	GO Biological Process	GO:0043933	macromolecular complex subunit organization	1279	0.0814267	3.5e-03	1.6e-02	9.6e-01	1.25148	112.667	141	0.109385	0.136893	1026	5.7e-02	9.3e-02	2.8e+01	1.14857	105.349	121	0.0946052
DNAm GrimAge	GO Biological Process	GO:0031571	mitotic G1 DNA damage checkpoint	75	0.00605653	3.5e-03	1.6e-02	9.6e-01	2.53788	4.72836	12	0.00459064	0.0116505	2203	1.6e-01	1.9e-01	5.4e+01	1.45688	6.1776	9	0.12
DNAm GrimAge	GO Biological Process	GO:0031331	positive regulation of cellular catabolic process	118	0.0107672	3.7e-03	1.6e-02	1.0e+00	1.87678	12.2551	23	0.0118981	0.0223301	800	3.3e-02	7.1e-02	7.7e+01	1.64619	9.71942	16	0.135593
DNAm GrimAge	GO Biological Process	GO:0046148	pigment biosynthetic process	47	0.00538358	3.8e-03	1.6e-02	1.0e+00	2.6406	4.16571	11	0.00404438	0.0106796	856	3.7e-02	7.5e-02	2.8e+01	2.06649	3.87129	8	0.170213
DNAm GrimAge	GO Biological Process	GO:0006596	polyamine biosynthetic process	11	0.00201884	3.9e-03	1.6e-02	1.1e+00	6.38978	0.626	4	0.000607767	0.00388349	1006	5.6e-02	9.1e-02	1.5e+01	3.31108	0.906047	3	0.272727
DNAm GrimAge	GO Biological Process	GO:0021514	ventral spinal cord interneuron differentiation	13	0.00336474	3.9e-03	1.6e-02	1.1e+00	2.98123	3.01889	9	0.00293096	0.00873786	260	2.8e-03	1.4e-02	7.9e+01	4.66948	1.07078	5	0.384615
DNAm GrimAge	GO Biological Process	GO:0002504	antigen processing and presentation of peptide or polysaccharide antigen via MHC class II	97	0.00807537	3.9e-03	1.6e-02	1.1e+00	2.16181	7.40119	16	0.00718563	0.015534	1574	1.0e-01	1.4e-01	4.2e+00	1.50194	7.98969	12	0.123711
DNAm GrimAge	GO Biological Process	GO:0071346	cellular response to interferon-gamma	82	0.00740242	4.0e-03	1.6e-02	1.1e+00	2.1605	7.4057	16	0.00719	0.015534	1176	7.3e-02	1.1e-01	3.0e+01	1.62862	6.75417	11	0.134146
DNAm GrimAge	GO Biological Process	GO:0043066	negative regulation of apoptotic process	657	0.0551817	4.1e-03	1.6e-02	1.1e+00	1.31709	72.8878	96	0.0707649	0.0932039	98	9.4e-05	1.3e-03	2.7e+01	1.51527	54.1157	82	0.12481
DNAm GrimAge	GO Biological Process	GO:0002706	regulation of lymphocyte mediated immunity	94	0.00807537	4.1e-03	1.6e-02	1.1e+00	2.15441	7.42664	16	0.00721033	0.015534	1486	8.5e-02	1.2e-01	8.3e+00	1.54987	7.74259	12	0.12766
DNAm GrimAge	GO Biological Process	GO:0046902	regulation of mitochondrial membrane permeability	21	0.00336474	4.2e-03	1.6e-02	1.2e+00	4.04172	1.48452	6	0.00144128	0.00582524	710	2.5e-02	5.9e-02	1.6e+01	2.89063	1.72973	5	0.238095
DNAm GrimAge	GO Biological Process	GO:0060712	spongiotrophoblast layer development	11	0.00134589	4.3e-03	1.6e-02	1.2e+00	4.03186	1.48815	6	0.0014448	0.00582524	2700	2.3e-01	2.5e-01	2.9e+00	2.20739	0.906047	2	0.181818
DNAm GrimAge	GO Biological Process	GO:0070208	protein heterotrimerization	10	0.00336474	4.3e-03	1.6e-02	1.2e+00	6.22182	0.642899	4	0.000624173	0.00388349	162	6.7e-04	4.8e-03	3.3e+01	6.07032	0.823679	5	0.5
DNAm GrimAge	GO Biological Process	GO:0018022	peptidyl-lysine methylation	26	0.00471063	4.3e-03	1.6e-02	1.2e+00	3.52355	1.98663	7	0.00192877	0.00679612	308	4.1e-03	1.8e-02	1.9e+01	3.26864	2.14157	7	0.269231
DNAm GrimAge	GO Biological Process	GO:0008637	apoptotic mitochondrial changes	49	0.00672948	4.3e-03	1.6e-02	1.2e+00	2.58859	4.24941	11	0.00412564	0.0106796	354	5.9e-03	2.2e-02	1.0e+01	2.47768	4.03603	10	0.204082
DNAm GrimAge	GO Biological Process	GO:0044783	G1 DNA damage checkpoint	76	0.00605653	4.3e-03	1.6e-02	1.2e+00	2.46521	4.86774	12	0.00472596	0.0116505	2278	1.7e-01	2.0e-01	4.1e+00	1.43771	6.25996	9	0.118421
DNAm GrimAge	GO Biological Process	GO:0048583	regulation of response to stimulus	2679	0.19179	4.4e-03	1.6e-02	1.2e+00	1.13785	277.717	316	0.269628	0.306796	37	1.2e-06	1.1e-04	2.8e+01	1.29156	220.664	285	0.106383
DNAm GrimAge	GO Biological Process	GO:0046039	GTP metabolic process	247	0.0188425	4.5e-03	1.7e-02	1.2e+00	1.66074	19.2686	32	0.0187073	0.031068	986	5.3e-02	9.1e-02	4.8e+01	1.37627	20.3449	28	0.11336
DNAm GrimAge	GO Biological Process	GO:0016574	histone ubiquitination	27	0.00336474	4.6e-03	1.7e-02	1.3e+00	3.15247	2.53769	8	0.00246378	0.00776699	1114	6.6e-02	1.0e-01	5.5e+01	2.24827	2.22393	5	0.185185
DNAm GrimAge	GO Biological Process	GO:0050873	brown fat cell differentiation	30	0.00403769	5.0e-03	1.8e-02	1.4e+00	2.86576	3.14053	9	0.00304906	0.00873786	802	3.3e-02	7.2e-02	3.9e+01	2.42813	2.47104	6	0.2
DNAm GrimAge	GO Biological Process	GO:0001947	heart looping	51	0.00740242	5.0e-03	1.8e-02	1.4e+00	2.16738	6.92081	15	0.00671923	0.0145631	251	2.5e-03	1.3e-02	1.2e+01	2.61857	4.20076	11	0.215686
DNAm GrimAge	GO Biological Process	GO:0006184	GTP catabolic process	234	0.0181696	5.2e-03	1.8e-02	1.4e+00	1.65906	18.6853	31	0.0181411	0.0300971	953	4.7e-02	8.6e-02	4.2e+01	1.40084	19.2741	27	0.115385
DNAm GrimAge	GO Biological Process	GO:0016180	snRNA processing	13	0.00201884	5.3e-03	1.8e-02	1.5e+00	5.83167	0.68591	4	0.000665932	0.00388349	1495	8.6e-02	1.2e-01	8.3e+00	2.80169	1.07078	3	0.230769
DNAm GrimAge	GO Biological Process	GO:0016073	snRNA metabolic process	14	0.00201884	5.4e-03	1.8e-02	1.5e+00	5.7984	0.689846	4	0.000669753	0.00388349	1591	1.0e-01	1.4e-01	1.1e+01	2.60157	1.15315	3	0.214286
DNAm GrimAge	GO Biological Process	GO:0016241	regulation of macroautophagy	20	0.00269179	5.6e-03	1.8e-02	1.5e+00	3.8107	1.57451	6	0.00152865	0.00582524	1194	7.7e-02	1.1e-01	1.2e+01	2.42813	1.64736	4	0.2
DNAm GrimAge	GO Biological Process	GO:1901069	guanosine-containing compound catabolic process	236	0.0181696	5.7e-03	1.8e-02	1.6e+00	1.64782	18.8127	31	0.0182647	0.0300971	982	5.1e-02	9.0e-02	2.8e+01	1.38897	19.4388	27	0.114407
DNAm GrimAge	GO Biological Process	GO:0016458	gene silencing	84	0.00807537	5.7e-03	1.8e-02	1.6e+00	2.13599	7.02251	15	0.00681797	0.0145631	894	4.2e-02	8.1e-02	1.2e+01	1.73438	6.91891	12	0.142857
DNAm GrimAge	GO Biological Process	GO:0071822	protein complex subunit organization	1114	0.0720054	5.7e-03	1.8e-02	1.6e+00	1.25509	98.0009	123	0.0951465	0.119417	980	5.1e-02	9.0e-02	6.3e+01	1.16611	91.7579	107	0.0960503
DNAm GrimAge	GO Biological Process	GO:0007093	mitotic cell cycle checkpoint	144	0.00942126	5.8e-03	1.8e-02	1.6e+00	1.86429	11.2643	21	0.0109362	0.0203883	3195	3.0e-01	3.2e-01	4.4e-02	1.18034	11.861	14	0.0972222
DNAm GrimAge	GO Biological Process	GO:0006779	porphyrin-containing compound biosynthetic process	29	0.00336474	5.9e-03	1.9e-02	1.6e+00	3.75891	1.59621	6	0.00154972	0.00582524	1489	8.6e-02	1.2e-01	4.9e+00	2.09321	2.38867	5	0.172414
DNAm GrimAge	GO Biological Process	GO:0060218	hematopoietic stem cell differentiation	10	0.00201884	6.1e-03	1.9e-02	1.7e+00	5.61556	0.712307	4	0.00069156	0.00388349	911	4.3e-02	8.1e-02	6.5e+00	3.64219	0.823679	3	0.3
DNAm GrimAge	GO Biological Process	GO:0060713	labyrinthine layer morphogenesis	17	0.00201884	6.2e-03	1.9e-02	1.7e+00	2.99297	2.67293	8	0.00259508	0.00776699	2161	1.6e-01	1.9e-01	5.9e+01	2.14247	1.40026	3	0.176471
DNAm GrimAge	GO Biological Process	GO:0045087	innate immune response	731	0.0504711	6.2e-03	1.9e-02	1.7e+00	1.32862	61.7182	82	0.0599206	0.0796117	732	2.8e-02	6.3e-02	1.3e+01	1.24562	60.211	75	0.102599
DNAm GrimAge	GO Biological Process	GO:1901068	guanosine-containing compound metabolic process	255	0.0188425	6.3e-03	1.9e-02	1.7e+00	1.62123	19.7381	32	0.0191632	0.031068	1174	7.2e-02	1.1e-01	9.0e+00	1.33309	21.0038	28	0.109804
DNAm GrimAge	GO Biological Process	GO:0060213	positive regulation of nuclear-transcribed mRNA poly(A) tail shortening	10	0.00201884	6.4e-03	1.9e-02	1.8e+00	4.36263	1.1461	5	0.00111272	0.00485437	911	4.3e-02	8.1e-02	8.9e+01	3.64219	0.823679	3	0.3
DNAm GrimAge	GO Biological Process	GO:0061371	determination of heart left/right asymmetry	54	0.00740242	6.4e-03	1.9e-02	1.8e+00	2.10777	7.11651	15	0.00690924	0.0145631	302	4.0e-03	1.7e-02	5.4e+01	2.47309	4.44787	11	0.203704
DNAm GrimAge	GO Biological Process	GO:0010954	positive regulation of protein processing	13	0.00201884	6.9e-03	2.0e-02	1.9e+00	5.40747	0.739718	4	0.000718172	0.00388349	1495	8.6e-02	1.2e-01	5.4e+01	2.80169	1.07078	3	0.230769
DNAm GrimAge	GO Biological Process	GO:0006952	defense response	1231	0.0760431	7.1e-03	2.1e-02	2.0e+00	1.24488	99.6083	124	0.0967071	0.120388	1708	1.2e-01	1.5e-01	3.5e+01	1.11445	101.395	113	0.0917953
DNAm GrimAge	GO Biological Process	GO:0006461	protein complex assembly	850	0.0572005	7.3e-03	2.1e-02	2.0e+00	1.28664	75.3904	97	0.0731946	0.0941748	815	3.5e-02	7.4e-02	1.4e+01	1.21406	70.0127	85	0.1
DNAm GrimAge	GO Biological Process	GO:0021680	cerebellar Purkinje cell layer development	23	0.00403769	7.3e-03	2.1e-02	2.0e+00	2.69919	3.33433	9	0.00323721	0.00873786	440	9.2e-03	2.9e-02	8.9e+01	3.16712	1.89446	6	0.26087
DNAm GrimAge	GO Biological Process	GO:0046856	phosphatidylinositol dephosphorylation	17	0.00201884	7.5e-03	2.1e-02	2.1e+00	4.2002	1.19042	5	0.00115575	0.00485437	2161	1.6e-01	1.9e-01	5.6e+01	2.14247	1.40026	3	0.176471
DNAm GrimAge	GO Biological Process	GO:0070271	protein complex biogenesis	853	0.0572005	7.6e-03	2.1e-02	2.1e+00	1.28406	75.5417	97	0.0733415	0.0941748	862	3.7e-02	7.5e-02	7.5e+01	1.20979	70.2599	85	0.0996483
DNAm GrimAge	GO Biological Process	GO:0046782	regulation of viral transcription	67	0.00605653	7.7e-03	2.1e-02	2.1e+00	2.51522	3.97579	10	0.00385999	0.00970874	1561	9.8e-02	1.3e-01	2.8e+01	1.63083	5.51865	9	0.134328
DNAm GrimAge	GO Biological Process	GO:0022403	cell cycle phase	41	0.00538358	7.8e-03	2.1e-02	2.1e+00	2.51123	3.98212	10	0.00386614	0.00970874	595	1.7e-02	4.5e-02	1.1e+02	2.36891	3.37709	8	0.195122
DNAm GrimAge	GO Biological Process	GO:0050776	regulation of immune response	698	0.0491252	7.8e-03	2.1e-02	2.1e+00	1.31107	64.0698	84	0.0622037	0.0815534	650	2.0e-02	5.1e-02	5.6e+00	1.26972	57.4928	73	0.104584
DNAm GrimAge	GO Biological Process	GO:0051259	protein oligomerization	336	0.0275909	7.9e-03	2.1e-02	2.2e+00	1.46249	31.4532	46	0.0305371	0.0446602	400	7.2e-03	2.5e-02	2.1e+02	1.48145	27.6756	41	0.122024
DNAm GrimAge	GO Biological Process	GO:0065003	macromolecular complex assembly	1001	0.0652759	7.9e-03	2.1e-02	2.2e+00	1.25699	89.102	112	0.0865068	0.108738	979	5.1e-02	9.0e-02	7.9e+01	1.17647	82.4503	97	0.0969031
DNAm GrimAge	GO Biological Process	GO:0006913	nucleocytoplasmic transport	217	0.0174966	8.0e-03	2.1e-02	2.2e+00	1.60557	19.3078	31	0.0187454	0.0300971	813	3.4e-02	7.3e-02	1.2e+01	1.45464	17.8738	26	0.119816
DNAm GrimAge	GO Biological Process	GO:0060548	negative regulation of cell death	693	0.0592194	8.1e-03	2.1e-02	2.2e+00	1.27358	79.3037	101	0.0769939	0.0980582	75	2.8e-05	7.1e-04	4.3e+01	1.54167	57.081	88	0.126984
DNAm GrimAge	GO Biological Process	GO:0071248	cellular response to metal ion	83	0.00942126	8.2e-03	2.1e-02	2.3e+00	2.04676	7.32867	15	0.00711521	0.0145631	409	7.5e-03	2.6e-02	1.9e+00	2.04782	6.83654	14	0.168675
DNAm GrimAge	GO Biological Process	GO:0051291	protein heterooligomerization	68	0.00874832	8.3e-03	2.1e-02	2.3e+00	2.10755	6.64277	14	0.00644929	0.0135922	280	3.3e-03	1.5e-02	3.8e+01	2.32101	5.60102	13	0.191176
DNAm GrimAge	GO Biological Process	GO:0045638	negative regulation of myeloid cell differentiation	78	0.00740242	8.5e-03	2.1e-02	2.3e+00	1.9395	8.76514	17	0.00850985	0.0165049	994	5.4e-02	9.1e-02	8.7e+01	1.71214	6.4247	11	0.141026
DNAm GrimAge	GO Biological Process	GO:0006839	mitochondrial transport	131	0.00807537	8.6e-03	2.1e-02	2.4e+00	1.93634	8.77946	17	0.00852375	0.0165049	3727	3.9e-01	4.1e-01	7.2e+01	1.11212	10.7902	12	0.0916031
DNAm GrimAge	GO Biological Process	GO:0072044	collecting duct development	11	0.00269179	8.7e-03	2.1e-02	2.4e+00	3.45687	1.73567	6	0.00168512	0.00582524	458	9.4e-03	2.9e-02	2.4e+01	4.41478	0.906047	4	0.363636
DNAm GrimAge	GO Biological Process	GO:0001704	formation of primary germ layer	84	0.0100942	8.8e-03	2.1e-02	2.4e+00	1.76421	12.4702	22	0.012107	0.0213592	282	3.3e-03	1.5e-02	2.4e+01	2.16797	6.91891	15	0.178571
DNAm GrimAge	GO Biological Process	GO:2000378	negative regulation of reactive oxygen species metabolic process	12	0.00269179	8.9e-03	2.1e-02	2.4e+00	5.03198	0.794915	4	0.000771763	0.00388349	515	1.3e-02	3.8e-02	6.1e+00	4.04688	0.988415	4	0.333333
DNAm GrimAge	GO Biological Process	GO:0021515	cell differentiation in spinal cord	50	0.00874832	8.9e-03	2.1e-02	2.4e+00	1.88935	9.5271	18	0.00924961	0.0174757	111	1.5e-04	1.7e-03	5.6e+01	3.15657	4.1184	13	0.26
DNAm GrimAge	GO Biological Process	GO:0010038	response to metal ion	227	0.0215343	9.0e-03	2.1e-02	2.5e+00	1.54411	22.6668	35	0.0220066	0.0339806	219	1.9e-03	1.1e-02	1.5e+02	1.71146	18.6975	32	0.140969
DNAm GrimAge	GO Biological Process	GO:0051641	cellular localization	1733	0.107672	9.0e-03	2.1e-02	2.5e+00	1.17853	159.521	188	0.154875	0.182524	1093	6.3e-02	1.0e-01	3.6e+00	1.12089	142.744	160	0.0923255
DNAm GrimAge	GO Biological Process	GO:0001916	positive regulation of T cell mediated cytotoxicity	26	0.00269179	9.0e-03	2.1e-02	2.5e+00	3.43102	1.74875	6	0.00169782	0.00582524	2191	1.6e-01	1.9e-01	1.9e+01	1.86779	2.14157	4	0.153846
DNAm GrimAge	GO Biological Process	GO:0016239	positive regulation of macroautophagy	10	0.00134589	9.1e-03	2.1e-02	2.5e+00	4.99261	0.801184	4	0.000777849	0.00388349	2363	2.0e-01	2.2e-01	5.0e+01	2.42813	0.823679	2	0.2
DNAm GrimAge	GO Biological Process	GO:1901698	response to nitrogen compound	674	0.0551817	9.1e-03	2.1e-02	2.5e+00	1.28086	73.3881	94	0.0712506	0.0912621	126	2.2e-04	2.2e-03	3.5e+01	1.47705	55.516	82	0.121662
DNAm GrimAge	GO Biological Process	GO:0090183	regulation of kidney development	47	0.00807537	9.3e-03	2.1e-02	2.6e+00	1.92094	8.84984	17	0.00859208	0.0165049	139	3.2e-04	2.8e-03	8.0e+01	3.09974	3.87129	12	0.255319
DNAm GrimAge	GO Biological Process	GO:0045923	positive regulation of fatty acid metabolic process	27	0.00538358	9.3e-03	2.1e-02	2.6e+00	2.44374	4.09208	10	0.0039729	0.00970874	185	1.1e-03	7.5e-03	5.4e+01	3.59723	2.22393	8	0.296296
DNAm GrimAge	GO Biological Process	GO:0043086	negative regulation of catalytic activity	637	0.0444145	9.3e-03	2.1e-02	2.6e+00	1.31333	60.1524	79	0.0584004	0.076699	772	3.1e-02	6.9e-02	7.4e-04	1.2579	52.4684	66	0.103611
DNAm GrimAge	GO Biological Process	GO:0043647	inositol phosphate metabolic process	55	0.00672948	9.4e-03	2.1e-02	2.6e+00	2.22517	5.39286	12	0.00523578	0.0116505	522	1.3e-02	3.8e-02	2.8e+01	2.20739	4.53024	10	0.181818
DNAm GrimAge	GO Biological Process	GO:0060707	trophoblast giant cell differentiation	11	0.00269179	9.4e-03	2.1e-02	2.6e+00	3.39897	1.76524	6	0.00171383	0.00582524	458	9.4e-03	2.9e-02	9.9e-02	4.41478	0.906047	4	0.363636
DNAm GrimAge	GO Biological Process	GO:0046348	amino sugar catabolic process	13	0.00201884	9.4e-03	2.1e-02	2.6e+00	7.02568	0.427005	3	0.000414568	0.00291262	1495	8.6e-02	1.2e-01	1.2e+02	2.80169	1.07078	3	0.230769
DNAm GrimAge	GO Biological Process	GO:0045579	positive regulation of B cell differentiation	10	0.00269179	9.4e-03	2.1e-02	2.6e+00	4.93756	0.810117	4	0.000786521	0.00388349	364	6.4e-03	2.4e-02	2.8e+01	4.85626	0.823679	4	0.4
DNAm GrimAge	GO Biological Process	GO:0048025	negative regulation of mRNA splicing, via spliceosome	15	0.00134589	9.5e-03	2.1e-02	2.6e+00	4.92243	0.812607	4	0.000788939	0.00388349	3547	3.5e-01	3.7e-01	7.2e+01	1.61875	1.23552	2	0.133333
DNAm GrimAge	GO Biological Process	GO:0042440	pigment metabolic process	60	0.00538358	9.7e-03	2.1e-02	2.7e+00	2.31015	4.7616	11	0.00462291	0.0106796	1710	1.2e-01	1.5e-01	3.5e+00	1.61875	4.94208	8	0.133333
DNAm GrimAge	GO Biological Process	GO:0010677	negative regulation of cellular carbohydrate metabolic process	23	0.00403769	9.8e-03	2.1e-02	2.7e+00	3.01188	2.32413	7	0.00225643	0.00679612	440	9.2e-03	2.9e-02	2.9e+01	3.16712	1.89446	6	0.26087
DNAm GrimAge	GO Biological Process	GO:2000134	negative regulation of G1/S transition of mitotic cell cycle	93	0.00740242	1.0e-02	2.1e-02	2.8e+00	2.05555	6.81083	14	0.00661246	0.0135922	1871	1.4e-01	1.7e-01	1.6e-01	1.43599	7.66022	11	0.11828
DNAm GrimAge	GO Biological Process	GO:0021513	spinal cord dorsal/ventral patterning	19	0.00336474	1.0e-02	2.1e-02	2.8e+00	2.55176	3.52698	9	0.00342426	0.00873786	577	1.6e-02	4.4e-02	1.2e+01	3.19491	1.56499	5	0.263158
DNAm GrimAge	GO Biological Process	GO:2000117	negative regulation of cysteine-type endopeptidase activity	69	0.00672948	1.0e-02	2.2e-02	2.8e+00	1.99289	7.52675	15	0.00730753	0.0145631	1004	5.5e-02	9.1e-02	4.2e+01	1.75951	5.68339	10	0.144927
DNAm GrimAge	GO Biological Process	GO:0010888	negative regulation of lipid storage	16	0.00269179	1.1e-02	2.2e-02	2.9e+00	3.85015	1.29865	5	0.00126082	0.00485437	864	3.7e-02	7.5e-02	8.0e+01	3.03516	1.31789	4	0.25
DNAm GrimAge	GO Biological Process	GO:0031442	positive regulation of mRNA 3'-end processing	15	0.00201884	1.1e-02	2.3e-02	3.1e+00	3.80305	1.31473	5	0.00127644	0.00485437	1727	1.2e-01	1.5e-01	3.3e+01	2.42813	1.23552	3	0.2
DNAm GrimAge	GO Biological Process	GO:0060850	regulation of transcription involved in cell fate commitment	14	0.00336474	1.1e-02	2.3e-02	3.1e+00	2.51353	3.58062	9	0.00347633	0.00873786	301	4.0e-03	1.7e-02	4.9e+01	4.33594	1.15315	5	0.357143
DNAm GrimAge	GO Biological Process	GO:0050684	regulation of mRNA processing	64	0.00538358	1.1e-02	2.3e-02	3.1e+00	2.16852	5.53372	12	0.00537255	0.0116505	1905	1.5e-01	1.9e-01	7.7e-04	1.51758	5.27155	8	0.125
DNAm GrimAge	GO Biological Process	GO:0060911	cardiac cell fate commitment	11	0.00201884	1.1e-02	2.3e-02	3.1e+00	2.92574	2.39255	7	0.00232287	0.00679612	1006	5.6e-02	9.1e-02	1.1e+02	3.31108	0.906047	3	0.272727
DNAm GrimAge	GO Biological Process	GO:0001912	positive regulation of leukocyte mediated cytotoxicity	39	0.00471063	1.2e-02	2.3e-02	3.2e+00	2.49598	3.6058	9	0.00350077	0.00873786	878	3.8e-02	7.6e-02	2.8e+01	2.17909	3.21235	7	0.179487
DNAm GrimAge	GO Biological Process	GO:0031935	regulation of chromatin silencing	12	0.00201884	1.2e-02	2.3e-02	3.3e+00	3.74497	1.33513	5	0.00129624	0.00485437	1135	7.0e-02	1.1e-01	5.4e+01	3.03516	0.988415	3	0.25
DNAm GrimAge	GO Biological Process	GO:0033014	tetrapyrrole biosynthetic process	32	0.00336474	1.2e-02	2.3e-02	3.3e+00	3.23348	1.85559	6	0.00180154	0.00582524	1714	1.2e-01	1.5e-01	3.2e+01	1.89698	2.63577	5	0.15625
DNAm GrimAge	GO Biological Process	GO:0072215	regulation of metanephros development	19	0.00336474	1.2e-02	2.3e-02	3.3e+00	2.66487	3.00203	8	0.00291459	0.00776699	577	1.6e-02	4.4e-02	1.8e+02	3.19491	1.56499	5	0.263158
DNAm GrimAge	GO Biological Process	GO:0046321	positive regulation of fatty acid oxidation	12	0.00336474	1.2e-02	2.3e-02	3.3e+00	2.89876	2.41482	7	0.00234449	0.00679612	215	1.8e-03	1.1e-02	6.2e+01	5.0586	0.988415	5	0.416667
DNAm GrimAge	GO Biological Process	GO:0071241	cellular response to inorganic substance	89	0.0100942	1.2e-02	2.3e-02	3.3e+00	1.90872	8.38256	16	0.00813841	0.015534	352	5.8e-03	2.2e-02	7.8e+01	2.04618	7.33075	15	0.168539
DNAm GrimAge	GO Biological Process	GO:0010771	negative regulation of cell morphogenesis involved in differentiation	23	0.00403769	1.2e-02	2.3e-02	3.4e+00	2.47395	3.6379	9	0.00353194	0.00873786	440	9.2e-03	2.9e-02	1.6e+01	3.16712	1.89446	6	0.26087
DNAm GrimAge	GO Biological Process	GO:1901991	negative regulation of mitotic cell cycle phase transition	164	0.0107672	1.3e-02	2.4e-02	3.5e+00	1.68144	13.6788	23	0.0132803	0.0223301	2932	2.8e-01	3.0e-01	1.7e+02	1.18445	13.5083	16	0.097561
DNAm GrimAge	GO Biological Process	GO:0002703	regulation of leukocyte mediated immunity	117	0.00874832	1.3e-02	2.4e-02	3.5e+00	1.85287	9.17496	17	0.00890772	0.0165049	2212	1.7e-01	1.9e-01	8.0e+01	1.34896	9.63705	13	0.111111
DNAm GrimAge	GO Biological Process	GO:0071277	cellular response to calcium ion	32	0.00605653	1.3e-02	2.4e-02	3.5e+00	2.32313	4.30454	10	0.00417917	0.00970874	166	8.4e-04	5.8e-03	8.2e+01	3.41456	2.63577	9	0.28125
DNAm GrimAge	GO Biological Process	GO:0051169	nuclear transport	222	0.0174966	1.3e-02	2.4e-02	3.5e+00	1.54855	20.0188	31	0.0194357	0.0300971	928	4.3e-02	8.1e-02	7.4e+01	1.42188	18.2857	26	0.117117
DNAm GrimAge	GO Biological Process	GO:0000387	spliceosomal snRNP assembly	32	0.00403769	1.3e-02	2.4e-02	3.6e+00	3.16574	1.89529	6	0.00184009	0.00582524	931	4.4e-02	8.2e-02	5.6e+01	2.27637	2.63577	6	0.1875
DNAm GrimAge	GO Biological Process	GO:0001910	regulation of leukocyte mediated cytotoxicity	47	0.00538358	1.3e-02	2.4e-02	3.6e+00	2.31415	4.32124	10	0.00419538	0.00970874	856	3.7e-02	7.5e-02	3.9e+01	2.06649	3.87129	8	0.170213
DNAm GrimAge	GO Biological Process	GO:0031324	negative regulation of cellular metabolic process	1474	0.107672	1.3e-02	2.4e-02	3.6e+00	1.16188	168.692	196	0.163779	0.190291	108	1.4e-04	1.6e-03	6.8e+01	1.31784	121.41	160	0.108548
DNAm GrimAge	GO Biological Process	GO:0016567	protein ubiquitination	511	0.0323015	1.3e-02	2.4e-02	3.7e+00	1.34523	45.3454	61	0.0440246	0.0592233	2343	1.9e-01	2.1e-01	1.6e+02	1.14041	42.09	48	0.0939335
DNAm GrimAge	GO Biological Process	GO:0042157	lipoprotein metabolic process	99	0.00740242	1.3e-02	2.4e-02	3.7e+00	1.98129	7.06609	14	0.00686028	0.0135922	2345	1.9e-01	2.1e-01	6.2e+01	1.34896	8.15443	11	0.111111
DNAm GrimAge	GO Biological Process	GO:0030330	DNA damage response, signal transduction by p53 class mediator	89	0.00807537	1.4e-02	2.4e-02	3.7e+00	2.04021	6.37188	13	0.00618629	0.0126214	1083	6.1e-02	9.8e-02	3.2e+01	1.63694	7.33075	12	0.134831
DNAm GrimAge	GO Biological Process	GO:0034612	response to tumor necrosis factor	96	0.0107672	1.4e-02	2.5e-02	3.9e+00	1.83322	9.27328	17	0.00900319	0.0165049	333	5.0e-03	2.0e-02	1.1e+02	2.02344	7.90732	16	0.166667
DNAm GrimAge	GO Biological Process	GO:0030856	regulation of epithelial cell differentiation	91	0.012786	1.4e-02	2.5e-02	3.9e+00	1.62446	15.3897	25	0.0149415	0.0242718	105	1.3e-04	1.6e-03	1.8e+02	2.53486	7.49548	19	0.208791
DNAm GrimAge	GO Biological Process	GO:0035195	gene silencing by miRNA	29	0.00336474	1.4e-02	2.5e-02	4.0e+00	2.78624	2.51234	7	0.00243917	0.00679612	1489	8.6e-02	1.2e-01	1.5e+01	2.09321	2.38867	5	0.172414
DNAm GrimAge	GO Biological Process	GO:0048541	Peyer's patch development	11	0.00201884	1.5e-02	2.5e-02	4.0e+00	3.54211	1.41159	5	0.00137047	0.00485437	1006	5.6e-02	9.1e-02	4.0e+01	3.31108	0.906047	3	0.272727
DNAm GrimAge	GO Biological Process	GO:0043922	negative regulation by host of viral transcription	12	0.00201884	1.5e-02	2.5e-02	4.0e+00	4.32507	0.924841	4	0.000897904	0.00388349	1135	7.0e-02	1.1e-01	2.4e+02	3.03516	0.988415	3	0.25
DNAm GrimAge	GO Biological Process	GO:0009892	negative regulation of metabolic process	1591	0.115747	1.5e-02	2.5e-02	4.1e+00	1.15264	179.588	207	0.174357	0.200971	99	9.6e-05	1.3e-03	9.8e+01	1.3125	131.047	172	0.108108
DNAm GrimAge	GO Biological Process	GO:0001666	response to hypoxia	221	0.0201884	1.5e-02	2.5e-02	4.1e+00	1.498	22.697	34	0.0220359	0.0330097	318	4.6e-03	1.9e-02	1.4e+02	1.64805	18.2033	30	0.135747
DNAm GrimAge	GO Biological Process	GO:0034504	protein localization to nucleus	132	0.0141319	1.5e-02	2.5e-02	4.1e+00	1.59946	16.2555	26	0.0157821	0.0252427	255	2.6e-03	1.3e-02	2.8e+01	1.93147	10.8726	21	0.159091
DNAm GrimAge	GO Biological Process	GO:0045912	negative regulation of carbohydrate metabolic process	27	0.00403769	1.5e-02	2.5e-02	4.1e+00	2.76463	2.53198	7	0.00245824	0.00679612	652	2.0e-02	5.1e-02	2.5e+02	2.69792	2.22393	6	0.222222
DNAm GrimAge	GO Biological Process	GO:0006783	heme biosynthetic process	22	0.00201884	1.5e-02	2.5e-02	4.1e+00	4.2943	0.931467	4	0.000904337	0.00388349	2907	2.7e-01	2.9e-01	2.4e+01	1.65554	1.8121	3	0.136364
DNAm GrimAge	GO Biological Process	GO:0010893	positive regulation of steroid biosynthetic process	12	0.00269179	1.5e-02	2.5e-02	4.2e+00	3.51541	1.42231	5	0.00138088	0.00485437	515	1.3e-02	3.8e-02	1.3e+02	4.04688	0.988415	4	0.333333
DNAm GrimAge	GO Biological Process	GO:0033673	negative regulation of kinase activity	184	0.0181696	1.5e-02	2.5e-02	4.2e+00	1.52853	20.281	31	0.0196902	0.0300971	243	2.4e-03	1.3e-02	4.5e+01	1.78151	15.1557	27	0.146739
DNAm GrimAge	GO Biological Process	GO:0048537	mucosal-associated lymphoid tissue development	12	0.00201884	1.5e-02	2.5e-02	4.2e+00	3.50498	1.42654	5	0.00138499	0.00485437	1135	7.0e-02	1.1e-01	1.6e+02	3.03516	0.988415	3	0.25
DNAm GrimAge	GO Biological Process	GO:0009896	positive regulation of catabolic process	161	0.0154778	1.6e-02	2.5e-02	4.3e+00	1.53712	19.517	30	0.0189485	0.0291262	373	6.6e-03	2.4e-02	5.0e+01	1.73438	13.2612	23	0.142857
DNAm GrimAge	GO Biological Process	GO:0006778	porphyrin-containing compound metabolic process	40	0.00336474	1.6e-02	2.5e-02	4.3e+00	3.03935	1.97411	6	0.00191661	0.00582524	2747	2.3e-01	2.5e-01	1.4e+02	1.51758	3.29472	5	0.125
DNAm GrimAge	GO Biological Process	GO:0042987	amyloid precursor protein catabolic process	11	0.00134589	1.6e-02	2.5e-02	4.3e+00	5.81619	0.515802	3	0.000500778	0.00291262	2700	2.3e-01	2.5e-01	1.9e+02	2.20739	0.906047	2	0.181818
DNAm GrimAge	GO Biological Process	GO:0070228	regulation of lymphocyte apoptotic process	35	0.00538358	1.6e-02	2.5e-02	4.3e+00	2.37401	3.79105	9	0.00368063	0.00873786	371	6.5e-03	2.4e-02	3.1e+01	2.77501	2.88288	8	0.228571
DNAm GrimAge	GO Biological Process	GO:1900151	regulation of nuclear-transcribed mRNA catabolic process, deadenylation-dependent decay	11	0.00201884	1.6e-02	2.6e-02	4.4e+00	3.45648	1.44656	5	0.00140442	0.00485437	1006	5.6e-02	9.1e-02	1.2e+02	3.31108	0.906047	3	0.272727
DNAm GrimAge	GO Biological Process	GO:2000116	regulation of cysteine-type endopeptidase activity	191	0.0161507	1.6e-02	2.6e-02	4.5e+00	1.52988	19.6093	30	0.0190382	0.0291262	708	2.5e-02	5.9e-02	9.4e+01	1.52553	15.7323	24	0.125655
DNAm GrimAge	GO Biological Process	GO:0021511	spinal cord patterning	21	0.00336474	1.6e-02	2.6e-02	4.5e+00	2.35157	3.82723	9	0.00371575	0.00873786	710	2.5e-02	5.9e-02	8.4e+01	2.89063	1.72973	5	0.238095
DNAm GrimAge	GO Biological Process	GO:0003333	amino acid transmembrane transport	35	0.00403769	1.7e-02	2.6e-02	4.6e+00	2.50393	3.19497	8	0.00310192	0.00776699	1094	6.4e-02	1.0e-01	1.9e+02	2.08125	2.88288	6	0.171429
DNAm GrimAge	GO Biological Process	GO:0031343	positive regulation of cell killing	42	0.00471063	1.7e-02	2.7e-02	4.7e+00	2.33763	3.85005	9	0.00373792	0.00873786	989	5.4e-02	9.1e-02	4.5e+00	2.02344	3.45945	7	0.166667
DNAm GrimAge	GO Biological Process	GO:0031047	gene silencing by RNA	57	0.00538358	1.8e-02	2.7e-02	4.9e+00	2.20478	4.53561	10	0.00440351	0.00970874	1550	9.4e-02	1.3e-01	1.0e+01	1.70395	4.69497	8	0.140351
DNAm GrimAge	GO Biological Process	GO:0051436	negative regulation of ubiquitin-protein ligase activity involved in mitotic cell cycle	67	0.00471063	1.8e-02	2.7e-02	4.9e+00	2.32109	3.8775	9	0.00376456	0.00873786	3232	3.1e-01	3.3e-01	1.2e+01	1.26843	5.51865	7	0.104478
DNAm GrimAge	GO Biological Process	GO:0051348	negative regulation of transferase activity	195	0.0188425	1.8e-02	2.7e-02	4.9e+00	1.49724	21.3726	32	0.0207501	0.031068	258	2.7e-03	1.4e-02	7.7e-02	1.74327	16.0617	28	0.14359
DNAm GrimAge	GO Biological Process	GO:0034660	ncRNA metabolic process	314	0.0188425	1.8e-02	2.7e-02	5.0e+00	1.51812	19.7613	30	0.0191857	0.0291262	3588	3.6e-01	3.7e-01	1.6e-01	1.08261	25.8635	28	0.089172
DNAm GrimAge	GO Biological Process	GO:0003143	embryonic heart tube morphogenesis	57	0.00740242	1.8e-02	2.7e-02	5.0e+00	1.85844	8.07127	15	0.00783619	0.0145631	357	6.2e-03	2.3e-02	4.1e+00	2.34293	4.69497	11	0.192983
DNAm GrimAge	GO Biological Process	GO:0060391	positive regulation of SMAD protein import into nucleus	10	0.00201884	1.8e-02	2.7e-02	5.0e+00	3.35142	1.49191	5	0.00144845	0.00485437	911	4.3e-02	8.1e-02	1.5e+01	3.64219	0.823679	3	0.3
DNAm GrimAge	GO Biological Process	GO:0006469	negative regulation of protein kinase activity	174	0.0168237	1.8e-02	2.7e-02	5.0e+00	1.52911	18.9653	29	0.0184129	0.0281553	314	4.4e-03	1.8e-02	1.8e+01	1.74435	14.332	25	0.143678
DNAm GrimAge	GO Biological Process	GO:0010948	negative regulation of cell cycle process	216	0.0154778	1.8e-02	2.7e-02	5.0e+00	1.51685	19.7778	30	0.0192018	0.0291262	1746	1.2e-01	1.5e-01	4.6e+00	1.29275	17.7915	23	0.106482
DNAm GrimAge	GO Biological Process	GO:0001890	placenta development	137	0.0121131	1.8e-02	2.7e-02	5.1e+00	1.5851	15.7719	25	0.0153125	0.0242718	795	3.2e-02	7.1e-02	2.9e+01	1.59512	11.2844	18	0.131387
DNAm GrimAge	GO Biological Process	GO:0031341	regulation of cell killing	50	0.00538358	1.8e-02	2.7e-02	5.1e+00	2.19034	4.5655	10	0.00443252	0.00970874	974	5.0e-02	9.0e-02	2.4e+01	1.9425	4.1184	8	0.16
DNAm GrimAge	GO Biological Process	GO:0035194	posttranscriptional gene silencing by RNA	32	0.00336474	1.9e-02	2.7e-02	5.1e+00	2.64312	2.64838	7	0.00257124	0.00679612	1714	1.2e-01	1.5e-01	1.1e-01	1.89698	2.63577	5	0.15625
DNAm GrimAge	GO Biological Process	GO:0010605	negative regulation of macromolecule metabolic process	1480	0.106999	1.9e-02	2.7e-02	5.1e+00	1.1519	168.417	194	0.163511	0.18835	129	2.4e-04	2.3e-03	1.2e+02	1.3043	121.905	159	0.107432
DNAm GrimAge	GO Biological Process	GO:0048742	regulation of skeletal muscle fiber development	32	0.00605653	1.9e-02	2.8e-02	5.2e+00	1.89538	7.38637	14	0.00717124	0.0135922	166	8.4e-04	5.8e-03	3.0e+01	3.41456	2.63577	9	0.28125
DNAm GrimAge	GO Biological Process	GO:0036293	response to decreased oxygen levels	224	0.0201884	1.9e-02	2.8e-02	5.3e+00	1.46915	23.1427	34	0.0224686	0.0330097	347	5.6e-03	2.2e-02	1.8e-03	1.62598	18.4504	30	0.133929
DNAm GrimAge	GO Biological Process	GO:0032108	negative regulation of response to nutrient levels	18	0.00336474	1.9e-02	2.8e-02	5.3e+00	3.30655	1.51215	5	0.0014681	0.00485437	513	1.3e-02	3.8e-02	1.2e+02	3.3724	1.48262	5	0.277778
DNAm GrimAge	GO Biological Process	GO:0044092	negative regulation of molecular function	797	0.0578735	1.9e-02	2.8e-02	5.4e+00	1.23304	80.2893	99	0.0779508	0.0961165	348	5.7e-03	2.2e-02	5.6e+00	1.31003	65.6472	86	0.107905
DNAm GrimAge	GO Biological Process	GO:0002709	regulation of T cell mediated immunity	51	0.00403769	2.0e-02	2.8e-02	5.5e+00	2.27661	3.95324	9	0.0038381	0.00873786	2780	2.4e-01	2.6e-01	4.9e+00	1.42831	4.20076	6	0.117647
DNAm GrimAge	GO Biological Process	GO:0010830	regulation of myotube differentiation	51	0.00740242	2.0e-02	2.8e-02	5.5e+00	1.79648	8.90632	16	0.00864692	0.015534	251	2.5e-03	1.3e-02	1.3e+02	2.61857	4.20076	11	0.215686
DNAm GrimAge	GO Biological Process	GO:0009880	embryonic pattern specification	60	0.00740242	2.1e-02	2.9e-02	5.7e+00	1.69266	11.2249	19	0.010898	0.0184466	438	9.1e-03	2.9e-02	1.9e+01	2.22579	4.94208	11	0.183333
DNAm GrimAge	GO Biological Process	GO:0043434	response to peptide hormone stimulus	351	0.0269179	2.1e-02	2.9e-02	5.8e+00	1.36985	34.3103	47	0.0333109	0.0456311	674	2.3e-02	5.5e-02	4.2e+01	1.38355	28.9111	40	0.11396
DNAm GrimAge	GO Biological Process	GO:0048524	positive regulation of viral process	72	0.00672948	2.1e-02	2.9e-02	5.8e+00	2.14521	4.66155	10	0.00452578	0.00970874	1159	7.0e-02	1.1e-01	7.7e-03	1.6862	5.93049	10	0.138889
DNAm GrimAge	GO Biological Process	GO:0002708	positive regulation of lymphocyte mediated immunity	59	0.00538358	2.1e-02	3.0e-02	5.9e+00	2.13675	4.68	10	0.00454369	0.00970874	1686	1.1e-01	1.4e-01	5.1e-02	1.64619	4.85971	8	0.135593
DNAm GrimAge	GO Biological Process	GO:0010243	response to organonitrogen compound	633	0.051144	2.1e-02	3.0e-02	5.9e+00	1.24555	70.6513	88	0.0685935	0.0854369	156	5.5e-04	4.3e-03	6.9e-01	1.45765	52.1389	76	0.120063
DNAm GrimAge	GO Biological Process	GO:0006354	DNA-dependent transcription, elongation	86	0.00672948	2.2e-02	3.0e-02	6.0e+00	2.13329	4.68759	10	0.00455106	0.00970874	2261	1.7e-01	2.0e-01	8.2e+00	1.4117	7.08364	10	0.116279
DNAm GrimAge	GO Biological Process	GO:0002711	positive regulation of T cell mediated immunity	39	0.00336474	2.2e-02	3.0e-02	6.0e+00	2.56153	2.73274	7	0.00265315	0.00679612	2460	2.2e-01	2.4e-01	9.7e-04	1.55649	3.21235	5	0.128205
DNAm GrimAge	GO Biological Process	GO:0051253	negative regulation of RNA metabolic process	918	0.0720054	2.2e-02	3.0e-02	6.0e+00	1.18384	116.57	138	0.113174	0.133981	109	1.4e-04	1.6e-03	1.8e-01	1.41509	75.6138	107	0.116558
DNAm GrimAge	GO Biological Process	GO:0006457	protein folding	203	0.012786	2.2e-02	3.0e-02	6.1e+00	1.5908	14.4581	23	0.014037	0.0223301	3236	3.1e-01	3.3e-01	2.2e-03	1.13632	16.7207	19	0.0935961
DNAm GrimAge	GO Biological Process	GO:0071379	cellular response to prostaglandin stimulus	10	0.00201884	2.2e-02	3.0e-02	6.2e+00	3.79271	1.05465	4	0.00102394	0.00388349	911	4.3e-02	8.1e-02	3.7e+00	3.64219	0.823679	3	0.3
DNAm GrimAge	GO Biological Process	GO:1900078	positive regulation of cellular response to insulin stimulus	11	0.00269179	2.3e-02	3.0e-02	6.3e+00	3.78145	1.0578	4	0.00102699	0.00388349	458	9.4e-03	2.9e-02	1.4e+01	4.41478	0.906047	4	0.363636
DNAm GrimAge	GO Biological Process	GO:0045577	regulation of B cell differentiation	20	0.00403769	2.3e-02	3.0e-02	6.3e+00	2.53126	2.76542	7	0.00268488	0.00679612	312	4.4e-03	1.8e-02	3.1e-01	3.64219	1.64736	6	0.3
DNAm GrimAge	GO Biological Process	GO:0042770	signal transduction in response to DNA damage	100	0.00807537	2.3e-02	3.0e-02	6.3e+00	1.89684	6.8535	13	0.00665389	0.0126214	1722	1.2e-01	1.5e-01	1.2e+01	1.45688	8.23679	12	0.12
DNAm GrimAge	GO Biological Process	GO:0051437	positive regulation of ubiquitin-protein ligase activity involved in mitotic cell cycle	72	0.00471063	2.3e-02	3.0e-02	6.3e+00	2.21657	4.06033	9	0.00394207	0.00873786	3655	3.8e-01	4.0e-01	1.5e+01	1.18034	5.93049	7	0.0972222
DNAm GrimAge	GO Biological Process	GO:0019217	regulation of fatty acid metabolic process	70	0.00740242	2.3e-02	3.0e-02	6.4e+00	1.84392	7.59252	14	0.00737138	0.0135922	728	2.7e-02	6.3e-02	5.7e+00	1.90782	5.76576	11	0.157143
DNAm GrimAge	GO Biological Process	GO:1901988	negative regulation of cell cycle phase transition	168	0.0107672	2.3e-02	3.0e-02	6.4e+00	1.58382	14.5218	23	0.0140988	0.0223301	3219	3.1e-01	3.3e-01	5.0e+01	1.15625	13.8378	16	0.0952381
DNAm GrimAge	GO Biological Process	GO:0060390	regulation of SMAD protein import into nucleus	12	0.00201884	2.3e-02	3.0e-02	6.4e+00	3.13754	1.59361	5	0.00154719	0.00485437	1135	7.0e-02	1.1e-01	1.5e+01	3.03516	0.988415	3	0.25
DNAm GrimAge	GO Biological Process	GO:1901652	response to peptide	360	0.0275909	2.3e-02	3.0e-02	6.5e+00	1.35455	35.4362	48	0.0344041	0.0466019	662	2.1e-02	5.2e-02	5.3e-01	1.38268	29.6525	41	0.113889
DNAm GrimAge	GO Biological Process	GO:0055002	striated muscle cell development	95	0.0100942	2.3e-02	3.0e-02	6.5e+00	1.62139	12.9519	21	0.0125746	0.0203883	484	1.1e-02	3.2e-02	2.1e+00	1.91694	7.82495	15	0.157895
DNAm GrimAge	GO Biological Process	GO:0070482	response to oxygen levels	237	0.0208614	2.3e-02	3.0e-02	6.5e+00	1.43624	24.3692	35	0.0236594	0.0339806	397	6.9e-03	2.4e-02	3.5e+01	1.58802	19.5212	31	0.130802
DNAm GrimAge	GO Biological Process	GO:0007389	pattern specification process	424	0.0437416	2.4e-02	3.0e-02	6.6e+00	1.25057	65.57	82	0.0636602	0.0796117	34	7.5e-07	1.0e-04	4.6e-01	1.86118	34.924	65	0.153302
DNAm GrimAge	GO Biological Process	GO:0001510	RNA methylation	29	0.00269179	2.4e-02	3.0e-02	6.6e+00	3.11507	1.6051	5	0.00155835	0.00485437	2447	2.1e-01	2.4e-01	1.9e+01	1.67457	2.38867	4	0.137931
DNAm GrimAge	GO Biological Process	GO:0001711	endodermal cell fate commitment	13	0.00201884	2.4e-02	3.0e-02	6.6e+00	2.74965	2.18209	6	0.00211854	0.00582524	1495	8.6e-02	1.2e-01	3.9e+01	2.80169	1.07078	3	0.230769
DNAm GrimAge	GO Biological Process	GO:0031570	DNA integrity checkpoint	144	0.00874832	2.4e-02	3.1e-02	6.7e+00	1.71797	9.89539	17	0.00960718	0.0165049	3881	4.1e-01	4.2e-01	4.9e+00	1.09603	11.861	13	0.0902778
DNAm GrimAge	GO Biological Process	GO:0019827	stem cell maintenance	98	0.0100942	2.4e-02	3.1e-02	6.7e+00	1.55847	15.3997	24	0.0149511	0.023301	530	1.4e-02	3.9e-02	1.0e+00	1.85826	8.07206	15	0.153061
DNAm GrimAge	GO Biological Process	GO:0007369	gastrulation	126	0.0141319	2.4e-02	3.1e-02	6.8e+00	1.50167	18.646	28	0.0181029	0.0271845	201	1.4e-03	9.0e-03	2.2e-03	2.02344	10.3784	21	0.166667
DNAm GrimAge	GO Biological Process	GO:0031440	regulation of mRNA 3'-end processing	17	0.00201884	2.5e-02	3.1e-02	6.8e+00	3.08964	1.61831	5	0.00157118	0.00485437	2161	1.6e-01	1.9e-01	9.2e+00	2.14247	1.40026	3	0.176471
DNAm GrimAge	GO Biological Process	GO:0061014	positive regulation of mRNA catabolic process	14	0.00201884	2.5e-02	3.1e-02	6.9e+00	3.07585	1.62557	5	0.00157822	0.00485437	1591	1.0e-01	1.4e-01	3.5e+00	2.60157	1.15315	3	0.214286
DNAm GrimAge	GO Biological Process	GO:0007214	gamma-aminobutyric acid signaling pathway	19	0.00538358	2.5e-02	3.1e-02	6.9e+00	2.48229	2.81998	7	0.00273785	0.00679612	91	6.9e-05	1.2e-03	8.1e-01	5.11185	1.56499	8	0.421053
DNAm GrimAge	GO Biological Process	GO:0060575	intestinal epithelial cell differentiation	12	0.00201884	2.5e-02	3.1e-02	6.9e+00	3.65848	1.09335	4	0.0010615	0.00388349	1135	7.0e-02	1.1e-01	2.1e+01	3.03516	0.988415	3	0.25
DNAm GrimAge	GO Biological Process	GO:0051168	nuclear export	102	0.00672948	2.5e-02	3.1e-02	7.0e+00	1.92693	6.22753	12	0.00604615	0.0116505	3320	3.3e-01	3.5e-01	8.8e-01	1.19026	8.40153	10	0.0980392
DNAm GrimAge	GO Biological Process	GO:0051254	positive regulation of RNA metabolic process	1136	0.0982503	2.6e-02	3.2e-02	7.2e+00	1.1554	144.539	167	0.140329	0.162136	19	2.8e-08	7.7e-06	7.6e+00	1.56033	93.57	146	0.128521
DNAm GrimAge	GO Biological Process	GO:0051649	establishment of localization in cell	1478	0.0888291	2.6e-02	3.2e-02	7.2e+00	1.16383	132.322	154	0.128468	0.149515	2258	1.7e-01	2.0e-01	2.5e+01	1.08428	121.74	132	0.0893099
DNAm GrimAge	GO Biological Process	GO:0003002	regionalization	300	0.0316285	2.6e-02	3.2e-02	7.2e+00	1.30159	45.3292	59	0.044009	0.0572816	62	1.4e-05	4.8e-04	3.7e+01	1.90203	24.7104	47	0.156667
DNAm GrimAge	GO Biological Process	GO:0031327	negative regulation of cellular biosynthetic process	1076	0.0834455	2.6e-02	3.2e-02	7.3e+00	1.16282	133.296	155	0.129414	0.150485	92	7.0e-05	1.2e-03	5.0e+01	1.39911	88.6279	124	0.115242
DNAm GrimAge	GO Biological Process	GO:0006368	transcription elongation from RNA polymerase II promoter	66	0.00538358	2.7e-02	3.2e-02	7.4e+00	2.28095	3.5073	8	0.00340515	0.00776699	2285	1.7e-01	2.0e-01	7.9e-03	1.47159	5.43628	8	0.121212
DNAm GrimAge	GO Biological Process	GO:0000245	spliceosomal complex assembly	45	0.00471063	2.7e-02	3.2e-02	7.4e+00	2.05583	4.86423	10	0.00472255	0.00970874	1181	7.3e-02	1.1e-01	2.9e+01	1.88854	3.70656	7	0.155556
DNAm GrimAge	GO Biological Process	GO:0000075	cell cycle checkpoint	212	0.0121131	2.7e-02	3.2e-02	7.4e+00	1.52855	16.3554	25	0.015879	0.0242718	4246	4.8e-01	4.8e-01	4.4e+01	1.03081	17.462	18	0.0849057
DNAm GrimAge	GO Biological Process	GO:0045596	negative regulation of cell differentiation	487	0.0444145	2.7e-02	3.2e-02	7.4e+00	1.23942	67.7735	84	0.0657995	0.0815534	83	4.0e-05	8.4e-04	1.6e+01	1.64534	40.1132	66	0.135524
DNAm GrimAge	GO Biological Process	GO:0032897	negative regulation of viral transcription	15	0.00201884	2.7e-02	3.2e-02	7.4e+00	3.58067	1.11711	4	0.00108457	0.00388349	1727	1.2e-01	1.5e-01	4.5e+01	2.42813	1.23552	3	0.2
DNAm GrimAge	GO Biological Process	GO:0006400	tRNA modification	30	0.00201884	2.7e-02	3.2e-02	7.5e+00	3.57772	1.11803	4	0.00108547	0.00388349	4141	4.5e-01	4.6e-01	9.0e+00	1.21406	2.47104	3	0.1
DNAm GrimAge	GO Biological Process	GO:0002705	positive regulation of leukocyte mediated immunity	61	0.00538358	2.7e-02	3.2e-02	7.5e+00	2.05239	4.87237	10	0.00473046	0.00970874	1758	1.3e-01	1.6e-01	1.0e+01	1.59222	5.02444	8	0.131148
DNAm GrimAge	GO Biological Process	GO:2000113	negative regulation of cellular macromolecule biosynthetic process	988	0.076716	2.7e-02	3.2e-02	7.6e+00	1.16903	123.179	144	0.119592	0.139806	106	1.3e-04	1.6e-03	1.5e+01	1.40084	81.3795	114	0.115385
DNAm GrimAge	GO Biological Process	GO:0051592	response to calcium ion	93	0.0121131	2.8e-02	3.2e-02	7.7e+00	1.63592	11.6142	19	0.011276	0.0184466	154	5.2e-04	4.2e-03	7.6e-01	2.3498	7.66022	18	0.193548
DNAm GrimAge	GO Biological Process	GO:0010629	negative regulation of gene expression	980	0.077389	2.8e-02	3.2e-02	7.7e+00	1.16857	123.227	144	0.119638	0.139806	87	6.1e-05	1.2e-03	2.8e+01	1.42467	80.7206	115	0.117347
DNAm GrimAge	GO Biological Process	GO:0071310	cellular response to organic substance	1498	0.111709	2.8e-02	3.2e-02	7.8e+00	1.144	159.091	182	0.154458	0.176699	80	3.5e-05	8.1e-04	2.0e+01	1.34536	123.387	166	0.110814
DNAm GrimAge	GO Biological Process	GO:0032774	RNA biosynthetic process	2506	0.165545	2.8e-02	3.2e-02	7.8e+00	1.11268	233.671	260	0.226865	0.252427	199	1.3e-03	8.7e-03	2.6e-02	1.19178	206.414	246	0.0981644
DNAm GrimAge	GO Biological Process	GO:0009437	carnitine metabolic process	10	0.000672947	2.8e-02	3.2e-02	7.9e+00	4.60253	0.651815	3	0.00063283	0.00291262	4665	5.8e-01	5.8e-01	2.3e+01	1.21406	0.823679	1	0.1
DNAm GrimAge	GO Biological Process	GO:0009890	negative regulation of biosynthetic process	1091	0.0841184	2.9e-02	3.2e-02	7.9e+00	1.15894	134.605	156	0.130685	0.151456	95	8.4e-05	1.3e-03	6.9e+00	1.391	89.8634	125	0.114574
DNAm GrimAge	GO Biological Process	GO:0032456	endocytic recycling	15	0.00134589	2.9e-02	3.2e-02	7.9e+00	3.51478	1.13805	4	0.0011049	0.00388349	3547	3.5e-01	3.7e-01	6.3e+01	1.61875	1.23552	2	0.133333
DNAm GrimAge	GO Biological Process	GO:0070932	histone H3 deacetylation	16	0.00269179	2.9e-02	3.2e-02	7.9e+00	2.96327	1.68733	5	0.00163818	0.00485437	864	3.7e-02	7.5e-02	1.8e-01	3.03516	1.31789	4	0.25
DNAm GrimAge	GO Biological Process	GO:0051146	striated muscle cell differentiation	160	0.0181696	2.9e-02	3.2e-02	7.9e+00	1.42914	23.0908	33	0.0224182	0.0320388	133	2.7e-04	2.5e-03	1.1e+00	2.04873	13.1789	27	0.16875
DNAm GrimAge	GO Biological Process	GO:0060026	convergent extension	17	0.00269179	2.9e-02	3.2e-02	8.0e+00	2.95897	1.68978	5	0.00164056	0.00485437	942	4.6e-02	8.4e-02	1.6e+00	2.85662	1.40026	4	0.235294
DNAm GrimAge	GO Biological Process	GO:0002697	regulation of immune effector process	251	0.0174966	2.9e-02	3.2e-02	8.0e+00	1.45706	20.5894	30	0.0199897	0.0291262	1797	1.3e-01	1.7e-01	4.7e+01	1.2576	20.6744	26	0.103586
DNAm GrimAge	GO Biological Process	GO:0050685	positive regulation of mRNA processing	22	0.00269179	2.9e-02	3.2e-02	8.0e+00	2.6283	2.28284	6	0.00221635	0.00582524	1578	1.0e-01	1.4e-01	3.4e-04	2.20739	1.8121	4	0.181818
DNAm GrimAge	GO Biological Process	GO:0034694	response to prostaglandin stimulus	19	0.00336474	2.9e-02	3.2e-02	8.0e+00	2.95552	1.69175	5	0.00164247	0.00485437	577	1.6e-02	4.4e-02	1.5e+01	3.19491	1.56499	5	0.263158
DNAm GrimAge	GO Biological Process	GO:0021884	forebrain neuron development	18	0.00201884	2.9e-02	3.2e-02	8.0e+00	2.40408	2.91172	7	0.00282691	0.00679612	2305	1.8e-01	2.1e-01	1.8e+01	2.02344	1.48262	3	0.166667
DNAm GrimAge	GO Biological Process	GO:0003382	epithelial cell morphogenesis	36	0.00538358	2.9e-02	3.2e-02	8.0e+00	1.88596	6.36282	12	0.00617749	0.0116505	419	7.8e-03	2.6e-02	9.1e+00	2.69792	2.96525	8	0.222222
DNAm GrimAge	GO Biological Process	GO:0006006	glucose metabolic process	156	0.012786	2.9e-02	3.2e-02	8.1e+00	1.58191	13.2751	21	0.0128884	0.0203883	998	5.5e-02	9.1e-02	6.9e-01	1.47867	12.8494	19	0.121795
DNAm GrimAge	GO Biological Process	GO:0002682	regulation of immune system process	1066	0.0713324	2.9e-02	3.2e-02	8.1e+00	1.18376	103.906	123	0.10088	0.119417	686	2.3e-02	5.6e-02	1.3e+01	1.20723	87.8042	106	0.0994372
DNAm GrimAge	GO Biological Process	GO:0006497	protein lipidation	58	0.00471063	3.0e-02	3.2e-02	8.1e+00	2.11734	4.25062	9	0.00412682	0.00873786	2396	2.0e-01	2.2e-01	2.4e+01	1.46525	4.77734	7	0.12069
DNAm GrimAge	GO Biological Process	GO:2000045	regulation of G1/S transition of mitotic cell cycle	118	0.00942126	3.0e-02	3.2e-02	8.2e+00	1.67547	10.1464	17	0.00985089	0.0165049	1619	1.1e-01	1.4e-01	2.8e+01	1.44042	9.71942	14	0.118644
DNAm GrimAge	GO Biological Process	GO:0018023	peptidyl-lysine trimethylation	16	0.00269179	3.0e-02	3.2e-02	8.3e+00	3.4637	1.15484	4	0.0011212	0.00388349	864	3.7e-02	7.5e-02	2.1e+01	3.03516	1.31789	4	0.25
DNAm GrimAge	GO Biological Process	GO:0048011	neurotrophin TRK receptor signaling pathway	277	0.0282638	3.1e-02	3.3e-02	8.6e+00	1.34237	33.5227	45	0.0325463	0.0436893	96	8.4e-05	1.3e-03	1.4e+01	1.84082	22.8159	42	0.151624
DNAm GrimAge	GO Biological Process	GO:0050996	positive regulation of lipid catabolic process	19	0.00269179	3.1e-02	3.3e-02	8.6e+00	2.58041	2.32521	6	0.00225749	0.00582524	1104	6.6e-02	1.0e-01	1.2e+01	2.55592	1.56499	4	0.210526
DNAm GrimAge	GO Biological Process	GO:0070933	histone H4 deacetylation	15	0.00269179	3.1e-02	3.3e-02	8.6e+00	2.89649	1.72623	5	0.00167595	0.00485437	751	3.0e-02	6.7e-02	1.4e+01	3.23751	1.23552	4	0.266667
DNAm GrimAge	GO Biological Process	GO:0070647	protein modification by small protein conjugation or removal	622	0.0370121	3.1e-02	3.3e-02	8.7e+00	1.25785	55.6506	70	0.0540297	0.0679612	3218	3.1e-01	3.3e-01	8.2e+01	1.07353	51.2329	55	0.0884244
DNAm GrimAge	GO Biological Process	GO:0050686	negative regulation of mRNA processing	17	0.00134589	3.2e-02	3.3e-02	8.7e+00	3.40208	1.17575	4	0.00114151	0.00388349	3894	4.1e-01	4.2e-01	2.4e+01	1.42831	1.40026	2	0.117647
DNAm GrimAge	GO Biological Process	GO:0034470	ncRNA processing	223	0.012786	3.2e-02	3.3e-02	8.8e+00	1.56789	13.3938	21	0.0130037	0.0203883	4210	4.7e-01	4.8e-01	1.2e+01	1.03441	18.3681	19	0.0852018
DNAm GrimAge	GO Biological Process	GO:0009799	specification of symmetry	95	0.0114401	3.2e-02	3.4e-02	8.9e+00	1.56495	13.419	21	0.0130281	0.0203883	214	1.8e-03	1.1e-02	4.4e+01	2.17254	7.82495	17	0.178947
DNAm GrimAge	GO Biological Process	GO:0050792	regulation of viral process	118	0.00874832	3.2e-02	3.4e-02	8.9e+00	1.75946	7.95699	14	0.00772523	0.0135922	2282	1.7e-01	2.0e-01	7.6e+00	1.33753	9.71942	13	0.11017
DNAm GrimAge	GO Biological Process	GO:0032233	positive regulation of actin filament bundle assembly	33	0.00471063	3.2e-02	3.4e-02	8.9e+00	2.19636	3.6424	8	0.00353631	0.00776699	571	1.6e-02	4.4e-02	2.0e+01	2.57529	2.71814	7	0.212121
DNAm GrimAge	GO Biological Process	GO:0035413	positive regulation of catenin import into nucleus	10	0.00201884	3.3e-02	3.4e-02	9.0e+00	2.86286	1.7465	5	0.00169564	0.00485437	911	4.3e-02	8.1e-02	1.2e+01	3.64219	0.823679	3	0.3
DNAm GrimAge	GO Biological Process	GO:0010558	negative regulation of macromolecule biosynthetic process	1029	0.0787349	3.3e-02	3.4e-02	9.0e+00	1.15946	126.783	147	0.12309	0.142718	121	1.9e-04	2.0e-03	1.1e+00	1.38042	84.7566	117	0.113703
DNAm GrimAge	GO Biological Process	GO:0030183	B cell differentiation	69	0.00807537	3.3e-02	3.4e-02	9.0e+00	1.68481	9.49663	16	0.00922003	0.015534	473	1.0e-02	3.1e-02	2.4e+01	2.11142	5.68339	12	0.173913
DNAm GrimAge	GO Biological Process	GO:0009798	axis specification	77	0.00942126	3.3e-02	3.4e-02	9.1e+00	1.56126	13.4507	21	0.0130589	0.0203883	295	3.8e-03	1.7e-02	3.2e+01	2.20739	6.34233	14	0.181818
DNAm GrimAge	GO Biological Process	GO:0071456	cellular response to hypoxia	86	0.00807537	3.3e-02	3.4e-02	9.2e+00	1.7516	7.9927	14	0.00775991	0.0135922	959	4.9e-02	8.9e-02	9.6e+00	1.69404	7.08364	12	0.139535
DNAm GrimAge	GO Biological Process	GO:0022010	central nervous system myelination	13	0.00201884	3.4e-02	3.4e-02	9.2e+00	2.83956	1.76084	5	0.00170955	0.00485437	1495	8.6e-02	1.2e-01	2.5e+00	2.80169	1.07078	3	0.230769
DNAm GrimAge	GO Biological Process	GO:0006950	response to stress	2962	0.175639	3.4e-02	3.4e-02	9.3e+00	1.10354	250.104	276	0.242819	0.267961	1702	1.1e-01	1.5e-01	4.4e+01	1.06979	243.974	261	0.0881161
DNAm GrimAge	GO Biological Process	GO:0043154	negative regulation of cysteine-type endopeptidase activity involved in apoptotic process	66	0.00605653	3.4e-02	3.4e-02	9.3e+00	1.79412	7.24591	13	0.00703486	0.0126214	1539	9.1e-02	1.3e-01	1.0e+01	1.65554	5.43628	9	0.136364
DNAm GrimAge	GO Biological Process	GO:0001892	embryonic placenta development	85	0.00807537	3.4e-02	3.4e-02	9.3e+00	1.59878	11.884	19	0.0115379	0.0184466	940	4.5e-02	8.4e-02	2.7e+01	1.71397	7.00127	12	0.141177
DNAm GrimAge	GO Biological Process	GO:0006977	DNA damage response, signal transduction by p53 class mediator resulting in cell cycle arrest	67	0.00471063	3.4e-02	3.4e-02	9.5e+00	2.16835	3.68944	8	0.00358198	0.00776699	3232	3.1e-01	3.3e-01	4.7e+00	1.26843	5.51865	7	0.104478
DNAm GrimAge	GO Cellular Component	GO:0042613	MHC class II protein complex	19	0.00269179	5.4e-08	1.8e-05	1.8e-05	16.2384	0.49266	8	0.000478311	0.00776699	83	6.6e-02	4.6e-01	2.4e+01	2.55592	1.56499	4	0.210526
DNAm GrimAge	GO Cellular Component	GO:0042611	MHC protein complex	27	0.00403769	3.0e-07	5.1e-05	1.0e-04	10.5544	0.852726	9	0.00082789	0.00873786	31	2.0e-02	3.9e-01	6.7e+01	2.69792	2.22393	6	0.222222
DNAm GrimAge	GO Cellular Component	GO:0031307	integral to mitochondrial outer membrane	15	0.00269179	1.8e-05	2.1e-03	6.3e-03	8.89223	0.787204	7	0.000764275	0.00679612	42	3.0e-02	3.9e-01	3.5e+01	3.23751	1.23552	4	0.266667
DNAm GrimAge	GO Cellular Component	GO:0031306	intrinsic to mitochondrial outer membrane	16	0.00269179	2.6e-05	2.2e-03	8.8e-03	8.42009	0.831345	7	0.000807131	0.00679612	56	3.7e-02	3.9e-01	3.0e+01	3.03516	1.31789	4	0.25
DNAm GrimAge	GO Cellular Component	GO:0071556	integral to lumenal side of endoplasmic reticulum membrane	24	0.00269179	2.8e-04	1.9e-02	9.5e-02	6.92333	0.866635	6	0.000841393	0.00582524	131	1.3e-01	5.9e-01	8.0e+00	2.02344	1.97683	4	0.166667
DNAm GrimAge	GO Cellular Component	GO:0042612	MHC class I protein complex	12	0.00201884	3.3e-04	1.9e-02	1.1e-01	8.65915	0.577424	5	0.000560606	0.00485437	85	7.0e-02	4.6e-01	1.3e-01	3.03516	0.988415	3	0.25
DNAm GrimAge	GO Cellular Component	GO:0031301	integral to organelle membrane	205	0.0174966	7.5e-04	3.7e-02	2.6e-01	1.86857	17.1254	32	0.0166266	0.031068	26	1.8e-02	3.9e-01	1.7e+01	1.53979	16.8854	26	0.126829
DNAm GrimAge	GO Cellular Component	GO:0031300	intrinsic to organelle membrane	217	0.0181696	1.0e-03	4.3e-02	3.4e-01	1.81475	18.1844	33	0.0176547	0.0320388	32	2.0e-02	3.9e-01	2.2e+01	1.51059	17.8738	27	0.124424
DNAm GrimAge	GO Cellular Component	GO:0000407	pre-autophagosomal structure	18	0.00269179	1.2e-03	4.6e-02	4.1e-01	5.20908	1.15183	6	0.00111828	0.00582524	69	5.5e-02	4.4e-01	1.3e+01	2.69792	1.48262	4	0.222222
DNAm GrimAge	MSigDB Cancer Neighborhood	MORF_DDB1	Neighborhood of DDB1	240	0.0215343	2.3e-08	9.1e-06	9.1e-06	2.83256	13.4154	38	0.0130247	0.0368932	1	4.6e-03	1.0e+00	2.8e+01	1.61875	19.7683	32	0.133333
DNAm GrimAge	MSigDB Cancer Neighborhood	MORF_PRKAG1	Neighborhood of PRKAG1	218	0.0181696	2.7e-05	5.5e-03	1.1e-02	2.29359	13.5159	31	0.0131223	0.0300971	4	2.2e-02	1.0e+00	7.9e+01	1.50366	17.9562	27	0.123853
DNAm GrimAge	MSigDB Cancer Neighborhood	MORF_PSMC1	Neighborhood of PSMC1	193	0.0148048	5.4e-05	7.2e-03	2.2e-02	2.51509	9.54242	24	0.00926448	0.023301	21	7.5e-02	1.0e+00	4.1e+01	1.38391	15.897	22	0.11399
DNAm GrimAge	MSigDB Cancer Neighborhood	MORF_AP2M1	Neighborhood of AP2M1	217	0.0161507	9.8e-05	9.8e-03	3.9e-02	2.3677	10.5588	25	0.0102512	0.0242718	26	8.5e-02	1.0e+00	3.5e+01	1.34274	17.8738	24	0.110599
DNAm GrimAge	MSigDB Cancer Neighborhood	GNF2_HLA-C	Neighborhood of HLA-C	47	0.00538358	1.4e-04	1.1e-02	5.7e-02	4.34278	2.30267	10	0.0022356	0.00970874	8	3.7e-02	1.0e+00	9.4e+00	2.06649	3.87129	8	0.170213
DNAm GrimAge	MSigDB Cancer Neighborhood	MORF_UBE2A	Neighborhood of UBE2A	50	0.00605653	1.8e-04	1.2e-02	7.2e-02	3.60105	3.33236	12	0.0032353	0.0116505	3	2.0e-02	1.0e+00	1.5e-01	2.18532	4.1184	9	0.18
DNAm GrimAge	MSigDB Cancer Neighborhood	MORF_USP5	Neighborhood of USP5	52	0.00605653	3.6e-04	2.1e-02	1.4e-01	4.23415	2.12557	9	0.00206366	0.00873786	6	2.5e-02	1.0e+00	2.0e+01	2.10127	4.28313	9	0.173077
DNAm GrimAge	MSigDB Cancer Neighborhood	MORF_DAP3	Neighborhood of DAP3	194	0.013459	5.2e-04	2.2e-02	2.1e-01	2.19339	10.4861	23	0.0101806	0.0223301	55	1.8e-01	1.0e+00	2.6e+01	1.25161	15.9794	20	0.103093
DNAm GrimAge	MSigDB Cancer Neighborhood	MORF_PRKAR1A	Neighborhood of PRKAR1A	143	0.012786	5.3e-04	2.2e-02	2.1e-01	2.23636	9.8374	22	0.00955087	0.0213592	7	2.6e-02	1.0e+00	1.5e+01	1.61309	11.7786	19	0.132867
DNAm GrimAge	MSigDB Cancer Neighborhood	GNF2_CD53	Neighborhood of CD53	58	0.00605653	5.5e-04	2.2e-02	2.2e-01	3.17515	3.77934	12	0.00366927	0.0116505	11	4.7e-02	1.0e+00	2.6e+01	1.88389	4.77734	9	0.155172
DNAm GrimAge	MSigDB Cancer Neighborhood	GNF2_INPP5D	Neighborhood of INPP5D	43	0.00471063	6.2e-04	2.3e-02	2.5e-01	3.9197	2.29609	9	0.00222922	0.00873786	17	6.0e-02	1.0e+00	3.6e+01	1.97638	3.54182	7	0.162791
DNAm GrimAge	MSigDB Cancer Neighborhood	GNF2_PTPN6	Neighborhood of PTPN6	47	0.00471063	8.0e-04	2.7e-02	3.2e-01	3.77833	2.38201	9	0.00231263	0.00873786	28	8.8e-02	1.0e+00	4.1e+01	1.80818	3.87129	7	0.148936
DNAm GrimAge	MSigDB Pathway	KEGG_ANTIGEN_PROCESSING_AND_PRESENTATION	Antigen processing and presentation	80	0.00605653	9.4e-06	2.6e-03	4.6e-03	4.92704	2.43554	12	0.0023646	0.0116505	305	2.1e-01	4.3e-01	3.5e+01	1.36582	6.58943	9	0.1125
DNAm GrimAge	MSigDB Pathway	REACTOME_CLASS_I_MHC_MEDIATED_ANTIGEN_PROCESSING_PRESENTATION	Genes involved in Class I MHC mediated antigen processing &amp; presentation	241	0.0181696	1.0e-05	2.6e-03	5.2e-03	2.11207	19.4123	41	0.0188469	0.0398058	131	6.3e-02	2.7e-01	9.8e+01	1.36016	19.8507	27	0.112033
DNAm GrimAge	MSigDB Pathway	REACTOME_ADAPTIVE_IMMUNE_SYSTEM	Genes involved in Adaptive Immune System	517	0.038358	3.3e-05	5.5e-03	1.6e-02	1.65875	42.8032	71	0.0415565	0.068932	50	1.5e-02	1.5e-01	5.1e+01	1.33852	42.5842	57	0.110252
DNAm GrimAge	MSigDB Pathway	KEGG_TYPE_I_DIABETES_MELLITUS	Type I diabetes mellitus	41	0.00538358	6.3e-05	7.8e-03	3.1e-02	4.0379	2.97184	12	0.00288528	0.0116505	53	1.7e-02	1.6e-01	4.3e+01	2.36891	3.37709	8	0.195122
DNAm GrimAge	MSigDB Pathway	KEGG_GRAFT_VERSUS_HOST_DISEASE	Graft-versus-host disease	37	0.00403769	1.1e-04	1.1e-02	5.3e-02	4.9998	1.80007	9	0.00174764	0.00873786	159	8.0e-02	2.7e-01	1.2e+01	1.96875	3.04761	6	0.162162
DNAm GrimAge	MSigDB Pathway	REACTOME_INTERFERON_ALPHA_BETA_SIGNALING	Genes involved in Interferon alpha/beta signaling	63	0.00403769	1.3e-04	1.1e-02	6.3e-02	4.03121	2.72871	11	0.00264923	0.0106796	533	4.2e-01	5.6e-01	1.9e-01	1.15625	5.18918	6	0.0952381
DNAm GrimAge	MSigDB Pathway	KEGG_ADIPOCYTOKINE_SIGNALING_PATHWAY	Adipocytokine signaling pathway	67	0.00942126	1.6e-04	1.1e-02	7.9e-02	2.65535	7.15538	19	0.00694697	0.0184466	8	9.6e-04	5.2e-02	2.5e+01	2.53685	5.51865	14	0.208955
DNAm GrimAge	MSigDB Pathway	REACTOME_REGULATORY_RNA_PATHWAYS	Genes involved in Regulatory RNA pathways	25	0.00403769	1.7e-04	1.1e-02	8.5e-02	5.30953	1.50672	8	0.00146284	0.00776699	48	1.4e-02	1.4e-01	3.2e+01	2.91376	2.0592	6	0.24
DNAm GrimAge	MSigDB Pathway	REACTOME_ACTIVATED_AMPK_STIMULATES_FATTY_ACID_OXIDATION_IN_MUSCLE	Genes involved in Activated AMPK stimulates fatty-acid oxidation in muscle	18	0.00269179	2.3e-04	1.3e-02	1.1e-01	5.89946	1.18655	7	0.00115199	0.00679612	120	5.5e-02	2.5e-01	1.9e+01	2.69792	1.48262	4	0.222222
DNAm GrimAge	MSigDB Pathway	REACTOME_ANTIGEN_PROCESSING_UBIQUITINATION_PROTEASOME_DEGRADATION	Genes involved in Antigen processing: Ubiquitination &amp; Proteasome degradation	204	0.0141319	2.7e-04	1.3e-02	1.3e-01	1.96472	16.7963	33	0.0163071	0.0320388	257	1.7e-01	3.9e-01	3.2e+01	1.24977	16.8031	21	0.102941
DNAm GrimAge	MSigDB Pathway	BIOCARTA_LEPTIN_PATHWAY	Reversal of Insulin Resistance by Leptin	11	0.00201884	2.9e-04	1.3e-02	1.5e-01	6.8607	0.874546	6	0.000849074	0.00582524	122	5.6e-02	2.5e-01	4.5e+01	3.31108	0.906047	3	0.272727
DNAm GrimAge	MSigDB Pathway	KEGG_ALLOGRAFT_REJECTION	Allograft rejection	35	0.00403769	3.4e-04	1.3e-02	1.7e-01	4.27679	2.10439	9	0.00204309	0.00873786	132	6.4e-02	2.7e-01	5.1e+01	2.08125	2.88288	6	0.171429
DNAm GrimAge	MSigDB Pathway	REACTOME_METABOLISM_OF_POLYAMINES	Genes involved in Metabolism of polyamines	15	0.00336474	3.5e-04	1.3e-02	1.7e-01	6.64116	0.903456	6	0.000877142	0.00582524	22	5.6e-03	1.1e-01	5.7e+01	4.04688	1.23552	5	0.333333
DNAm GrimAge	MSigDB Pathway	KEGG_NOTCH_SIGNALING_PATHWAY	Notch signaling pathway	47	0.00605653	4.7e-04	1.6e-02	2.3e-01	3.23021	3.71493	12	0.00360673	0.0116505	44	1.3e-02	1.4e-01	1.9e+01	2.32481	3.87129	9	0.191489
DNAm GrimAge	MSigDB Pathway	REACTOME_IMMUNE_SYSTEM	Genes involved in Immune System	902	0.0605653	4.8e-04	1.6e-02	2.4e-01	1.40037	72.1238	101	0.0700231	0.0980582	79	3.2e-02	2.1e-01	4.7e+00	1.21137	74.2959	90	0.0997783
DNAm GrimAge	MSigDB Pathway	KEGG_AUTOIMMUNE_THYROID_DISEASE	Autoimmune thyroid disease	50	0.00403769	6.6e-04	2.0e-02	3.3e-01	3.88808	2.31476	9	0.00224734	0.00873786	315	2.3e-01	4.3e-01	6.5e+00	1.45688	4.1184	6	0.12
DNAm GrimAge	MSigDB Pathway	REACTOME_ANTIGEN_PRESENTATION_FOLDING_ASSEMBLY_AND_PEPTIDE_LOADING_OF_CLASS_I_MHC	Genes involved in Antigen Presentation: Folding, assembly and peptide loading of class I MHC	20	0.00269179	7.0e-04	2.0e-02	3.5e-01	5.79994	1.03449	6	0.00100436	0.00582524	156	7.7e-02	2.7e-01	2.3e+00	2.42813	1.64736	4	0.2
DNAm GrimAge	MSigDB Pathway	PID_IL3_PATHWAY	IL3-mediated signaling events	27	0.00605653	7.2e-04	2.0e-02	3.6e-01	3.83606	2.34616	9	0.00227782	0.00873786	2	2.0e-04	5.0e-02	6.5e+00	4.04688	2.22393	9	0.333333
DNAm GrimAge	MSigDB Pathway	BIOCARTA_IL22BP_PATHWAY	IL22 Soluble Receptor Signaling Pathway	16	0.00269179	1.2e-03	3.0e-02	5.8e-01	6.51878	0.767015	5	0.000744674	0.00485437	89	3.7e-02	2.2e-01	1.9e+01	3.03516	1.31789	4	0.25
DNAm GrimAge	MSigDB Pathway	REACTOME_ER_PHAGOSOME_PATHWAY	Genes involved in ER-Phagosome pathway	60	0.00471063	1.2e-03	3.1e-02	6.1e-01	3.27092	3.05724	10	0.00296819	0.00970874	311	2.2e-01	4.3e-01	5.4e-04	1.41641	4.94208	7	0.116667
DNAm GrimAge	MSigDB Pathway	PID_IL4_2PATHWAY	IL4-mediated signaling events	62	0.00740242	1.3e-03	3.1e-02	6.4e-01	2.50968	5.97686	15	0.00580278	0.0145631	41	1.2e-02	1.4e-01	1.0e+01	2.15399	5.10681	11	0.177419
DNAm GrimAge	MSigDB Pathway	REACTOME_ANTIGEN_PROCESSING_CROSS_PRESENTATION	Genes involved in Antigen processing-Cross presentation	74	0.00605653	1.4e-03	3.1e-02	6.8e-01	2.84652	4.21567	12	0.00409289	0.0116505	237	1.5e-01	3.8e-01	1.4e-03	1.47656	6.09523	9	0.121622
DNAm GrimAge	MSigDB Pathway	KEGG_PHOSPHATIDYLINOSITOL_SIGNALING_SYSTEM	Phosphatidylinositol signaling system	77	0.0107672	1.9e-03	4.0e-02	9.2e-01	2.15348	8.82293	19	0.00856596	0.0184466	4	4.6e-04	5.2e-02	2.3e+01	2.52273	6.34233	16	0.207792
DNAm GrimAge	MSigDB Oncogenic Signatures	PRC2_EDD_UP.V1_UP	Genes up-regulated in TIG3 cells (fibroblasts) upon knockdown of EED [Gene ID=8726] gene.	189	0.0161507	2.6e-04	4.8e-02	4.8e-02	2.17863	11.9341	26	0.0115865	0.0252427	17	2.2e-02	2.4e-01	1.3e+01	1.54167	15.5675	24	0.126984
DNAm GrimAge	MSigDB Immunologic Signatures	GSE22886_IGG_IGA_MEMORY_BCELL_VS_BM_PLASMA_CELL_DN	Genes down-regulated in comparison of memory IgG IgA B cells versus plasma cells from bone marrow and blood.	183	0.0188425	3.2e-06	1.6e-03	1.6e-03	2.40374	14.5607	35	0.0141366	0.0339806	14	1.0e-03	3.2e-02	3.5e+01	1.85759	15.0733	28	0.153005
DNAm GrimAge	MSigDB Immunologic Signatures	GSE360_L_DONOVANI_VS_B_MALAYI_HIGH_DOSE_MAC_DN	Genes down-regulated in comparison of macrophages exposed to L. donovani versus macrophages exposed to 50 worms/well B. malayi.	200	0.0188425	1.6e-05	3.9e-03	7.9e-03	2.29043	14.4078	33	0.0139881	0.0320388	37	3.9e-03	5.1e-02	9.8e+01	1.69969	16.4736	28	0.14
DNAm GrimAge	MSigDB Immunologic Signatures	GSE360_L_MAJOR_VS_M_TUBERCULOSIS_DC_UP	Genes up-regulated in comparison of dendritic cells (DC) exposed to L. major versus DCs exposed to M. tuberculosis.	190	0.0201884	5.1e-05	8.4e-03	2.5e-02	1.98617	20.1392	40	0.0195527	0.038835	6	4.1e-04	3.2e-02	5.1e+01	1.91694	15.6499	30	0.157895
DNAm GrimAge	MSigDB Immunologic Signatures	GSE6269_FLU_VS_E_COLI_INF_PBMC_UP	Genes up-regulated in comparison of peripheral blood mononuclear cells (PBMC) from patients with acute influenza infection versus PBMC from patients with acute E. coli infection.	155	0.0114401	6.8e-05	8.5e-03	3.4e-02	2.67298	7.85639	21	0.00762756	0.0203883	421	1.4e-01	2.3e-01	4.3e+01	1.33156	12.767	17	0.109677
DNAm GrimAge	MSigDB Immunologic Signatures	GSE17721_LPS_VS_CPG_16H_BMDM_DN	Genes down-regulated in comparison of dendritic cells (DC) stimulated with LPS (TLR4 agonist) at 16 h versus DC cells stimulated with CpG DNA (TLR9 agonist) at 16 h.	196	0.0201884	1.0e-04	1.0e-02	5.1e-02	2.02454	17.2879	35	0.0167844	0.0339806	10	7.0e-04	3.2e-02	1.2e+01	1.85826	16.1441	30	0.153061
DNAm GrimAge	MSigDB Immunologic Signatures	GSE360_CTRL_VS_B_MALAYI_HIGH_DOSE_MAC_UP	Genes up-regulated in comparison of macrophages versus macrophages exposed to B. malayi (50 worms/well).	207	0.0208614	1.8e-04	1.2e-02	8.9e-02	1.96416	17.8194	35	0.0173003	0.0339806	12	8.4e-04	3.2e-02	1.9e-01	1.81816	17.0502	31	0.149758
DNAm GrimAge	MSigDB Immunologic Signatures	GSE22886_NAIVE_CD4_TCELL_VS_48H_ACT_TH2_UP	Genes up-regulated in comparison of naive CD4 [GeneID=920] T cells versus stimulated CD4 [GeneID=920] Th2 cells at 48 h.	190	0.0195155	1.8e-04	1.2e-02	9.1e-02	2.00873	16.4283	33	0.0159498	0.0320388	13	8.9e-04	3.2e-02	2.5e+01	1.85305	15.6499	29	0.152632
DNAm GrimAge	MSigDB Immunologic Signatures	GSE11057_NAIVE_CD4_VS_PBMC_CD4_TCELL_UP	Genes up-regulated in comparison of naive T cells versus peripheral blood mononuclear cells (PBMC).	177	0.0168237	1.9e-04	1.2e-02	9.3e-02	2.1187	13.6876	29	0.013289	0.0281553	47	5.5e-03	6.1e-02	3.2e+01	1.71478	14.5791	25	0.141243
DNAm GrimAge	MSigDB Immunologic Signatures	GSE360_CTRL_VS_L_DONOVANI_MAC_UP	Genes up-regulated in comparison of macrophages versus macrophages exposed to L.donovani.	197	0.0195155	3.1e-04	1.7e-02	1.5e-01	1.99719	15.5218	31	0.0150697	0.0300971	21	1.6e-03	3.6e-02	1.9e+01	1.7872	16.2265	29	0.147208
DNAm GrimAge	MSigDB Immunologic Signatures	GSE39820_CTRL_VS_TGFBETA3_IL6_IL23A_CD4_TCELL_DN	Genes down-regulated in comparison of untreated CD4 [GeneID=920] T cells versus those treated with TGFB3 [GeneID=7043], IL6 [GeneID=3569] and IL32A [GeneID=51561].	196	0.013459	3.5e-04	1.7e-02	1.7e-01	2.06697	13.5464	28	0.0131519	0.0271845	527	1.9e-01	2.7e-01	3.2e+01	1.23884	16.1441	20	0.102041
DNAm GrimAge	MSigDB Immunologic Signatures	GSE3982_NEUTROPHIL_VS_BCELL_DN	Genes down-regulated in comparison of neutrophils versus B cells.	193	0.0188425	3.8e-04	1.7e-02	1.9e-01	1.94889	16.4196	32	0.0159414	0.031068	27	2.3e-03	4.1e-02	4.5e+01	1.76134	15.897	28	0.145078
DNAm GrimAge	MSigDB Immunologic Signatures	GSE17721_PAM3CSK4_VS_GADIQUIMOD_4H_BMDM_UP	Genes up-regulated in comparison of dendritic cells (DC) stimulated with Pam3Csk4 (TLR1/2 agonist) at 4 h versus DC cells stimulated with Gardiquimod (TLR7 agonist) at 4 h.	200	0.0181696	4.9e-04	2.1e-02	2.5e-01	1.89598	17.4052	33	0.0168983	0.0320388	53	7.4e-03	7.4e-02	5.1e+01	1.63899	16.4736	27	0.135
DNAm GrimAge	MSigDB Immunologic Signatures	GSE17721_LPS_VS_GARDIQUIMOD_2H_BMDM_DN	Genes down-regulated in comparison of dendritic cells (DC) stimulated with LPS (TLR4 agonist) at 2 h versus DC cells stimulated with Gardiquimod (TLR7 agonist) at 2 h.	195	0.0168237	6.5e-04	2.5e-02	3.2e-01	1.98488	14.1066	28	0.0136958	0.0271845	87	1.8e-02	1.2e-01	5.8e+01	1.55649	16.0617	25	0.128205
DNAm GrimAge	MSigDB Immunologic Signatures	GSE17721_12H_VS_24H_LPS_BMDM_DN	Genes down-regulated in comparison of dendritic cells (DC) stimulated with LPS (TLR4 agonist) at 12 h versus those stimulated at 24 h.	190	0.012786	7.0e-04	2.5e-02	3.5e-01	2.10352	11.4095	24	0.0110771	0.023301	573	2.2e-01	3.1e-01	1.9e+01	1.21406	15.6499	19	0.1
DNAm GrimAge	MSigDB Immunologic Signatures	GSE17721_PAM3CSK4_VS_CPG_0.5H_BMDM_UP	Genes up-regulated in comparison of dendritic cells (DC) stimulated with Pam3Csk4 (TLR1/2 agonist) at 0.5 h versus DC cells stimulated with CpG DNA (TLR9 agonist) at 0.5 h.	193	0.0168237	7.9e-04	2.6e-02	4.0e-01	1.8845	16.45	31	0.0159708	0.0300971	76	1.6e-02	1.2e-01	4.7e+00	1.57262	15.897	25	0.129534
DNAm GrimAge	MSigDB Immunologic Signatures	GSE37416_CTRL_VS_6H_F_TULARENSIS_LVS_NEUTROPHIL_DN	Genes down-regulated in comparison of control polymorphonuclear leukocytes (PMN) at 6 h versus PMN treated with F. tularensis vaccine at 6 h.	185	0.0161507	9.2e-04	2.9e-02	4.6e-01	1.96549	13.737	27	0.0133369	0.0262136	85	1.8e-02	1.2e-01	6.5e+00	1.575	15.2381	24	0.12973
DNAm GrimAge	MSigDB Immunologic Signatures	GSE1460_NAIVE_CD4_TCELL_CORD_BLOOD_VS_THYMIC_STROMAL_CELL_UP	Genes up-regulated in naive CD4 [GeneID=920] T cells from cord blood versus thymic stromal cells.	177	0.0141319	1.4e-03	3.8e-02	6.8e-01	1.96849	12.7001	25	0.0123302	0.0242718	218	5.7e-02	1.7e-01	2.3e+00	1.44042	14.5791	21	0.118644
DNAm GrimAge	MSigDB Immunologic Signatures	GSE31082_DN_VS_DP_THYMOCYTE_DN	Genes down-regulated in comparison of CD4- [GeneID=920] CD8- thymocytes versus CD4+ [GeneID=920] CD8+ thymocytes.	193	0.0154778	1.4e-03	3.8e-02	7.0e-01	1.79689	17.8085	32	0.0172898	0.031068	182	4.7e-02	1.6e-01	6.5e+00	1.44681	15.897	23	0.119171
DNAm GrimAge	MSigDB Immunologic Signatures	GSE3982_MAC_VS_CENT_MEMORY_CD4_TCELL_DN	Genes down-regulated in comparison of macrophages versus central memory CD4 [GeneID=920] T cells.	183	0.0161507	1.5e-03	3.8e-02	7.3e-01	1.83105	16.3841	30	0.0159069	0.0291262	74	1.6e-02	1.2e-01	1.9e+01	1.59222	15.0733	24	0.131148
DNAm GrimAge	MSigDB Immunologic Signatures	GSE36476_YOUNG_VS_OLD_DONOR_MEMORY_CD4_TCELL_40H_TSST_ACT_DN	Genes down-regulated in comparison of memory CD4 [GeneID=920] T cells from young donors treated with TSST at 40 h versus those from old donors treated with TSST at 40 h.	210	0.0154778	1.5e-03	3.8e-02	7.5e-01	1.8496	15.679	29	0.0152224	0.0281553	332	9.8e-02	1.9e-01	5.4e-04	1.32969	17.2973	23	0.109524
DNAm GrimAge	MSigDB Immunologic Signatures	GSE17721_CTRL_VS_GARDIQUIMOD_6H_BMDM_UP	Genes up-regulated in comparison of control dendritic cells (DC) at 6 h versus those stimulated with Gardiquimod (TLR7 agonist) at 6 h.	193	0.0161507	1.6e-03	3.8e-02	8.0e-01	1.84153	15.7477	29	0.0152891	0.0281553	128	2.8e-02	1.3e-01	1.0e+01	1.50972	15.897	24	0.124352
DNAm GrimAge	MSigDB Immunologic Signatures	GSE17721_12H_VS_24H_POLYIC_BMDM_DN	Genes down-regulated in comparison of dendritic cells (DC) stimulated with LPS (TLR4 agonist) at 12 h versus those stimulated at 24 h.	191	0.0148048	1.7e-03	3.9e-02	8.6e-01	1.85477	15.0962	28	0.0146565	0.0271845	246	6.8e-02	1.8e-01	1.4e-03	1.3984	15.7323	22	0.115183
DNAm GrimAge	MSigDB Immunologic Signatures	GSE8384_CTRL_VS_B_ABORTUS_4H_MAC_CELL_LINE_DN	Genes down-regulated in comparison of control RAW264.7 cells (macrophages) versus those infected with B. abortus.	197	0.0154778	1.9e-03	3.9e-02	9.4e-01	1.89292	13.7354	26	0.0133353	0.0252427	211	5.6e-02	1.7e-01	2.4e+01	1.41744	16.2265	23	0.116751
DNAm GrimAge	MSigDB Immunologic Signatures	GSE24634_TEFF_VS_TCONV_DAY5_IN_CULTURE_DN	Genes down-regulated in comparison of untreated CD25+ T effector cells at day 5 versus untreated CD25- T cells at day 5.	184	0.0154778	1.9e-03	3.9e-02	9.6e-01	1.79746	16.6902	30	0.0162041	0.0291262	131	2.9e-02	1.3e-01	6.9e-01	1.51758	15.1557	23	0.125
DNAm GrimAge	MSigDB Immunologic Signatures	GSE22886_NAIVE_CD4_TCELL_VS_12H_ACT_TH2_UP	Genes up-regulated in comparison of naive CD4 [GeneID=920] T cells versus stimulated CD4 [GeneID=920] Th2 cells at 12 h.	188	0.0148048	2.1e-03	3.9e-02	1.0e+00	1.8075	16.0442	29	0.0155769	0.0281553	222	6.0e-02	1.7e-01	1.2e+02	1.42071	15.4852	22	0.117021
DNAm GrimAge	MSigDB Immunologic Signatures	GSE39820_CTRL_VS_TGFBETA1_IL6_IL23A_CD4_TCELL_DN	Genes down-regulated in comparison of untreated CD4 [GeneID=920] T cells versus those treated with IL6 [GeneID=3569] and IL23A [GeneID=51561].	196	0.012786	2.2e-03	3.9e-02	1.1e+00	1.90114	13.15	25	0.012767	0.0242718	657	2.6e-01	3.5e-01	6.6e+00	1.1769	16.1441	19	0.0969388
DNAm GrimAge	MSigDB Immunologic Signatures	GSE1460_DP_THYMOCYTE_VS_THYMIC_STROMAL_CELL_UP	Genes up-regulated in comparison of CD4 [GeneID=920] CD8 thymocytes versus thymic stromal cells.	186	0.0195155	2.2e-03	3.9e-02	1.1e+00	1.76309	17.5828	31	0.0170706	0.0300971	7	6.3e-04	3.2e-02	1.8e-04	1.8929	15.3204	29	0.155914
DNAm GrimAge	MSigDB Immunologic Signatures	GSE9988_ANTI_TREM1_VS_ANTI_TREM1_AND_LPS_MONOCYTE_UP	Genes up-regulated in comparison of monocytes treated with anti-TREM1 [GeneID=54210] versus monocytes treated with anti-TREM1 [GeneID=54210] and 5000 ng/ml LPS (TLR4 agonist).	191	0.013459	2.2e-03	3.9e-02	1.1e+00	1.95917	11.7397	23	0.0113977	0.0223301	458	1.6e-01	2.5e-01	3.8e+01	1.27127	15.7323	20	0.104712
DNAm GrimAge	MSigDB Immunologic Signatures	GSE17974_CTRL_VS_ACT_IL4_AND_ANTI_IL12_1H_CD4_TCELL_UP	Genes up-regulated in comparison of untreated CD4 [GeneID=920] T cells at 0 h versus the cells treated with IL4 [GeneID=3565] and anti-IL12 at 1 h.	174	0.0141319	2.4e-03	4.1e-02	1.2e+00	1.83415	14.7207	27	0.0142919	0.0262136	191	4.9e-02	1.6e-01	1.2e+02	1.46525	14.332	21	0.12069
DNAm GrimAge	MSigDB Immunologic Signatures	GSE2706_2H_VS_8H_R848_STIM_DC_UP	Genes up-regulated in comparison of dendritic cells (DC) stimulated with R848 at 2 h versus DCs stimulatd with R848 for 8 h.	185	0.0141319	2.5e-03	4.2e-02	1.3e+00	1.82786	14.7714	27	0.0143412	0.0262136	281	8.3e-02	1.9e-01	2.3e+02	1.37813	15.2381	21	0.113514
DNAm GrimAge	MSigDB Immunologic Signatures	GSE14308_TH2_VS_NAIVE_CD4_TCELL_DN	Genes down-regulated in comparison of Th2 cells versus naive CD4 [GeneID=620] T cells.	193	0.0188425	2.8e-03	4.6e-02	1.4e+00	1.71485	18.6605	32	0.018117	0.031068	27	2.3e-03	4.1e-02	4.9e+01	1.76134	15.897	28	0.145078
DNAm GrimAge	MSigDB Immunologic Signatures	KAECH_DAY8_EFF_VS_DAY15_EFF_CD8_TCELL_DN	Genes down-regulated in comparison of effector CD8 T cells at the peak expansion phase (day8) versus those at contraction (day 15) after LCMV-Armstrong infection.	193	0.0168237	3.1e-03	4.6e-02	1.6e+00	1.68778	19.5523	33	0.0189828	0.0320388	76	1.6e-02	1.2e-01	4.8e+01	1.57262	15.897	25	0.129534
DNAm GrimAge	MSigDB Immunologic Signatures	GSE3982_NEUTROPHIL_VS_NKCELL_UP	Genes up-regulated in comparison of neutrophils versus NK cells.	209	0.0161507	3.2e-03	4.6e-02	1.6e+00	1.69955	18.8285	32	0.0182801	0.031068	229	6.1e-02	1.7e-01	2.8e+01	1.39414	17.2149	24	0.114833
DNAm GrimAge	MSigDB Immunologic Signatures	GSE360_T_GONDII_VS_B_MALAYI_HIGH_DOSE_MAC_DN	Genes down-regulated in comparison of macrophages exposed to T. gondii versus macrophages exposed to 50 worms/well B. malayi.	199	0.0148048	3.3e-03	4.6e-02	1.6e+00	1.81475	14.327	26	0.0139097	0.0252427	324	9.6e-02	1.9e-01	3.5e+01	1.34218	16.3912	22	0.110553
DNAm GrimAge	MSigDB Immunologic Signatures	GSE3982_EFF_MEMORY_CD4_TCELL_VS_NKCELL_UP	Genes up-regulated in comparison of effective memory CD4 [GeneID=920] T cells versus NK cells.	202	0.0201884	3.3e-03	4.6e-02	1.6e+00	1.62742	22.7353	37	0.0220731	0.0359223	17	1.2e-03	3.2e-02	7.9e+01	1.80307	16.6383	30	0.148515
DNAm GrimAge	MSigDB Immunologic Signatures	GSE10325_LUPUS_CD4_TCELL_VS_LUPUS_MYELOID_UP	Genes up-regulated in comparison of systemic lupus erythematosus CD4 [GeneID=920] T cells versus systemic lupus erythematosus myeloid cells.	188	0.0222073	3.3e-03	4.6e-02	1.6e+00	1.65293	21.1745	35	0.0205577	0.0339806	1	2.6e-05	1.3e-02	3.5e+01	2.13107	15.4852	33	0.175532

## Sheet: adm
DNAm	Database	ID	Desc	GeneSetSize	GeneSetCov	BinomP	Binom.FDR	Binom.Bon	RegionFoldEnrich	ExpRegions	ObsRegions	GenomeFrac	SetCov	HyperRank	HyperP	Hyper.FDR	Hyper.Bon	GeneFoldEnrich	ExpGenes	ObsGenes	TermCov
DNAm Adrenomedullin	GO Biological Process	GO:0060712	spongiotrophoblast layer development	11	0.00680272	1.7e-04	3.8e-02	5.1e-02	14.8846	0.268734	4	0.0014448	0.0215054	67	1.3e-02	1.2e-01	8.7e-01	11.1571	0.179258	2	0.181818
DNAm Adrenomedullin	GO Biological Process	GO:0034341	response to interferon-gamma	100	0.0204082	2.5e-04	3.8e-02	7.5e-02	4.94783	1.61687	8	0.00869285	0.0430108	34	5.9e-03	1.2e-01	3.2e+00	3.68184	1.62962	6	0.06
DNAm Adrenomedullin	GO Biological Process	GO:0022617	extracellular matrix disassembly	77	0.0238095	4.9e-04	4.3e-02	1.4e-01	5.14788	1.35978	7	0.00731066	0.0376344	11	2.6e-04	2.6e-02	4.7e+00	5.57854	1.25481	7	0.0909091
DNAm Adrenomedullin	GO Biological Process	GO:0060968	regulation of gene silencing	31	0.0102041	5.7e-04	4.3e-02	1.7e-01	10.7794	0.371078	4	0.00199504	0.0215054	72	1.4e-02	1.2e-01	2.1e+00	5.93845	0.505183	3	0.0967742
DNAm Adrenomedullin	GO Biological Process	GO:0045727	positive regulation of translation	56	0.0136054	8.2e-04	4.8e-02	2.4e-01	7.01821	0.712432	5	0.00383028	0.0268817	65	1.3e-02	1.2e-01	5.4e+00	4.38314	0.912588	4	0.0714286
DNAm Adrenomedullin	MSigDB Cancer Neighborhood	GCM_DEAF1	Neighborhood of DEAF1	26	0.0102041	1.1e-04	2.8e-02	2.8e-02	10.8921	0.45905	5	0.00246801	0.0268817	1	8.4e-03	9.3e-01	7.3e-01	7.08045	0.423702	3	0.115385
DNAm Adrenomedullin	PANTHER Pathway	P00035	Interferon-gamma signaling pathway	28	0.0102041	8.2e-04	3.5e-02	3.5e-02	9.79252	0.408475	4	0.0021961	0.0215054	1	1.0e-02	4.1e-01	1.3e-01	6.57471	0.456294	3	0.107143

## Sheet: B2M
DNAm	Database	ID	Desc	GeneSetSize	GeneSetCov	BinomP	Binom.FDR	Binom.Bon	RegionFoldEnrich	ExpRegions	ObsRegions	GenomeFrac	SetCov	HyperRank	HyperP	Hyper.FDR	Hyper.Bon	GeneFoldEnrich	ExpGenes	ObsGenes	TermCov
DNAm Beta-2-microglobulin	GO Molecular Function	GO:0032395	MHC class II receptor activity	12	0.00704225	2.5e-08	9.0e-06	9.0e-06	140.748	0.0284196	4	0.000312303	0.043956	143	9.0e-02	4.3e-01	3.3e+01	10.5874	0.0944515	1	0.0833333
DNAm Beta-2-microglobulin	GO Molecular Function	GO:0042605	peptide antigen binding	22	0.0140845	1.7e-06	3.2e-04	6.3e-04	48.1566	0.0830624	4	0.000912773	0.043956	40	1.3e-02	2.1e-01	4.7e+00	11.5499	0.173161	2	0.0909091
DNAm Beta-2-microglobulin	GO Molecular Function	GO:0003823	antigen binding	56	0.0140845	6.4e-05	7.8e-03	2.3e-02	19.0725	0.209726	4	0.00230469	0.043956	127	7.2e-02	4.3e-01	2.6e+01	4.53747	0.440774	2	0.0357143
DNAm Beta-2-microglobulin	GO Molecular Function	GO:0001047	core promoter binding	62	0.0422535	3.0e-04	2.7e-02	1.1e-01	6.67379	0.89904	6	0.00987956	0.0659341	1	9.2e-06	3.3e-03	3.3e-03	12.2951	0.488	6	0.0967742
DNAm Beta-2-microglobulin	GO Molecular Function	GO:0000979	RNA polymerase II core promoter sequence-specific DNA binding	27	0.028169	5.8e-04	4.2e-02	2.1e-01	10.685	0.374358	4	0.00411382	0.043956	2	5.6e-05	1.0e-02	2.0e-02	18.8221	0.212516	4	0.148148
DNAm Beta-2-microglobulin	GO Biological Process	GO:0060337	type I interferon-mediated signaling pathway	64	0.028169	3.3e-07	2.9e-05	1.1e-04	22.6571	0.264818	6	0.00291009	0.0659341	70	1.6e-03	9.3e-03	3.0e+01	7.94058	0.503741	4	0.0625
DNAm Beta-2-microglobulin	GO Biological Process	GO:0071357	cellular response to type I interferon	65	0.028169	3.3e-07	2.9e-05	1.1e-04	22.6408	0.265009	6	0.00291219	0.0659341	76	1.7e-03	9.3e-03	4.2e+00	7.81842	0.511612	4	0.0615385
DNAm Beta-2-microglobulin	GO Biological Process	GO:0034340	response to type I interferon	66	0.028169	3.5e-07	2.9e-05	1.2e-04	22.3696	0.268222	6	0.00294749	0.0659341	78	1.8e-03	9.3e-03	2.4e+01	7.69996	0.519483	4	0.0606061
DNAm Beta-2-microglobulin	GO Biological Process	GO:0042789	mRNA transcription from RNA polymerase II promoter	12	0.0140845	3.6e-07	2.9e-05	1.2e-04	71.9781	0.0555724	4	0.000610686	0.043956	151	3.9e-03	1.0e-02	3.0e-03	21.1749	0.0944515	2	0.166667
DNAm Beta-2-microglobulin	GO Biological Process	GO:0009299	mRNA transcription	16	0.0140845	1.1e-06	7.0e-05	3.5e-04	54.6888	0.0731412	4	0.000803749	0.043956	205	6.9e-03	1.5e-02	1.9e-02	15.8812	0.125935	2	0.125
DNAm Beta-2-microglobulin	GO Biological Process	GO:0016574	histone ubiquitination	27	0.0211268	3.5e-06	1.8e-04	1.2e-03	22.3011	0.224204	5	0.00246378	0.0549451	57	1.2e-03	8.3e-03	5.2e-02	14.1166	0.212516	3	0.111111
DNAm Beta-2-microglobulin	GO Biological Process	GO:0035987	endodermal cell differentiation	16	0.0211268	3.8e-06	1.8e-04	1.2e-03	22.0295	0.226969	5	0.00249416	0.0549451	15	2.5e-04	5.6e-03	1.9e-01	23.8217	0.125935	3	0.1875
DNAm Beta-2-microglobulin	GO Biological Process	GO:0071346	cellular response to interferon-gamma	82	0.0352113	4.7e-06	1.9e-04	1.6e-03	10.6986	0.65429	7	0.00719	0.0769231	22	4.7e-04	7.4e-03	5.1e-01	7.74691	0.645419	5	0.0609756
DNAm Beta-2-microglobulin	GO Biological Process	GO:0060333	interferon-gamma-mediated signaling pathway	61	0.028169	5.1e-06	1.9e-04	1.7e-03	14.0218	0.427905	6	0.00470226	0.0659341	64	1.4e-03	8.5e-03	1.2e+01	8.3311	0.480129	4	0.0655738
DNAm Beta-2-microglobulin	GO Biological Process	GO:0002682	regulation of immune system process	1066	0.140845	8.4e-06	2.8e-04	2.8e-03	2.61436	9.18007	24	0.10088	0.263736	16	2.6e-04	5.6e-03	8.8e-01	2.38366	8.39044	20	0.0187617
DNAm Beta-2-microglobulin	GO Biological Process	GO:0007492	endoderm development	51	0.0352113	1.2e-05	3.8e-04	4.1e-03	9.20315	0.760609	7	0.00835834	0.0769231	5	4.9e-05	3.3e-03	8.1e-02	12.4558	0.401419	5	0.0980392
DNAm Beta-2-microglobulin	GO Biological Process	GO:0034341	response to interferon-gamma	100	0.0352113	1.6e-05	3.8e-04	5.3e-03	8.849	0.791049	7	0.00869285	0.0769231	55	1.2e-03	8.3e-03	5.5e+00	6.35246	0.787096	5	0.05
DNAm Beta-2-microglobulin	GO Biological Process	GO:0035412	regulation of catenin import into nucleus	22	0.0211268	1.7e-05	3.8e-04	5.5e-03	16.1608	0.30939	5	0.00339989	0.0549451	30	6.6e-04	7.6e-03	3.4e+00	17.3249	0.173161	3	0.136364
DNAm Beta-2-microglobulin	GO Biological Process	GO:0060850	regulation of transcription involved in cell fate commitment	14	0.0211268	1.8e-05	3.8e-04	6.1e-03	15.8055	0.316346	5	0.00347633	0.0549451	11	1.6e-04	4.5e-03	7.9e-01	27.2248	0.110193	3	0.214286
DNAm Beta-2-microglobulin	GO Biological Process	GO:0001912	positive regulation of leukocyte mediated cytotoxicity	39	0.0211268	1.9e-05	3.8e-04	6.3e-03	15.6951	0.31857	5	0.00350077	0.0549451	141	3.5e-03	1.0e-02	1.8e+01	9.77302	0.306968	3	0.0769231
DNAm Beta-2-microglobulin	GO Biological Process	GO:0035413	positive regulation of catenin import into nucleus	10	0.0140845	2.0e-05	3.8e-04	6.5e-03	25.9231	0.154303	4	0.00169564	0.043956	113	2.7e-03	9.8e-03	2.2e+01	25.4099	0.0787096	2	0.2
DNAm Beta-2-microglobulin	GO Biological Process	GO:0001916	positive regulation of T cell mediated cytotoxicity	26	0.0140845	2.0e-05	3.8e-04	6.5e-03	25.8897	0.154501	4	0.00169782	0.043956	389	1.8e-02	2.7e-02	5.4e+00	9.77302	0.204645	2	0.0769231
DNAm Beta-2-microglobulin	GO Biological Process	GO:0010390	histone monoubiquitination	18	0.0140845	2.1e-05	3.8e-04	6.9e-03	25.5036	0.15684	4	0.00172352	0.043956	253	8.7e-03	1.7e-02	4.1e+01	14.1166	0.141677	2	0.111111
DNAm Beta-2-microglobulin	GO Biological Process	GO:0002479	antigen processing and presentation of exogenous peptide antigen via MHC class I, TAP-dependent	74	0.0211268	2.2e-05	3.9e-04	7.4e-03	15.1731	0.32953	5	0.00362121	0.0549451	416	2.1e-02	3.0e-02	4.3e+01	5.15065	0.582451	3	0.0405405
DNAm Beta-2-microglobulin	GO Biological Process	GO:0031343	positive regulation of cell killing	42	0.0211268	2.6e-05	4.3e-04	8.6e-03	14.6994	0.340151	5	0.00373792	0.0549451	167	4.4e-03	1.1e-02	1.5e+01	9.07495	0.33058	3	0.0714286
DNAm Beta-2-microglobulin	GO Biological Process	GO:0042590	antigen processing and presentation of exogenous peptide antigen via MHC class I	78	0.0211268	2.7e-05	4.3e-04	9.0e-03	14.5581	0.343452	5	0.0037742	0.0549451	488	2.4e-02	3.4e-02	3.0e+01	4.88651	0.613935	3	0.0384615
DNAm Beta-2-microglobulin	GO Biological Process	GO:0061311	cell surface receptor signaling pathway involved in heart development	18	0.0211268	3.6e-05	5.4e-04	1.2e-02	13.7199	0.364433	5	0.00400476	0.0549451	20	3.6e-04	6.2e-03	1.3e+00	21.1749	0.141677	3	0.166667
DNAm Beta-2-microglobulin	GO Biological Process	GO:0001910	regulation of leukocyte mediated cytotoxicity	47	0.0211268	4.5e-05	6.4e-04	1.5e-02	13.0966	0.381779	5	0.00419538	0.0549451	192	6.0e-03	1.4e-02	3.5e+00	8.10953	0.369935	3	0.0638298
DNAm Beta-2-microglobulin	GO Biological Process	GO:0001711	endodermal cell fate commitment	13	0.0140845	4.6e-05	6.4e-04	1.5e-02	20.7483	0.192787	4	0.00211854	0.043956	170	4.5e-03	1.1e-02	3.0e+00	19.5461	0.102322	2	0.153846
DNAm Beta-2-microglobulin	GO Biological Process	GO:0031341	regulation of cell killing	50	0.0211268	5.8e-05	7.7e-04	1.9e-02	12.3959	0.403359	5	0.00443252	0.0549451	209	7.1e-03	1.5e-02	3.4e+01	7.62296	0.393548	3	0.06
DNAm Beta-2-microglobulin	GO Biological Process	GO:0002708	positive regulation of lymphocyte mediated immunity	59	0.0211268	6.5e-05	8.3e-04	2.2e-02	12.0926	0.413476	5	0.00454369	0.0549451	280	1.1e-02	2.1e-02	9.6e+00	6.46013	0.464387	3	0.0508475
DNAm Beta-2-microglobulin	GO Biological Process	GO:0001914	regulation of T cell mediated cytotoxicity	31	0.0140845	6.9e-05	8.4e-04	2.3e-02	18.7416	0.213428	4	0.00234537	0.043956	494	2.5e-02	3.5e-02	1.4e+01	8.19673	0.244	2	0.0645161
DNAm Beta-2-microglobulin	GO Biological Process	GO:0035019	somatic stem cell maintenance	37	0.0211268	7.3e-05	8.6e-04	2.4e-02	8.69513	0.690042	6	0.00758288	0.0659341	121	3.0e-03	1.0e-02	8.3e+00	10.3013	0.291226	3	0.0810811
DNAm Beta-2-microglobulin	GO Biological Process	GO:0002705	positive regulation of leukocyte mediated immunity	61	0.0211268	7.9e-05	8.8e-04	2.6e-02	11.6152	0.430472	5	0.00473046	0.0549451	296	1.2e-02	2.2e-02	5.0e+00	6.24833	0.480129	3	0.0491803
DNAm Beta-2-microglobulin	GO Biological Process	GO:0002699	positive regulation of immune effector process	115	0.0352113	8.4e-05	8.8e-04	2.8e-02	6.79144	1.03071	7	0.0113265	0.0769231	95	2.2e-03	9.3e-03	4.2e+01	5.52388	0.905161	5	0.0434783
DNAm Beta-2-microglobulin	GO Biological Process	GO:0045596	negative regulation of cell differentiation	487	0.0915493	8.5e-05	8.8e-04	2.8e-02	2.83913	5.98775	17	0.0657995	0.186813	8	1.3e-04	4.5e-03	3.5e+01	3.39146	3.83316	13	0.0266941
DNAm Beta-2-microglobulin	GO Biological Process	GO:0001706	endoderm formation	28	0.0211268	8.5e-05	8.8e-04	2.8e-02	11.4159	0.437986	5	0.00481303	0.0549451	63	1.4e-03	8.5e-03	3.2e+00	13.6124	0.220387	3	0.107143
DNAm Beta-2-microglobulin	GO Biological Process	GO:0002697	regulation of immune effector process	251	0.0492958	9.1e-05	9.2e-04	3.0e-02	4.94761	1.81906	9	0.0199897	0.0989011	145	3.8e-03	1.0e-02	2.4e+01	3.54321	1.97561	7	0.0278884
DNAm Beta-2-microglobulin	GO Biological Process	GO:0006955	immune response	1110	0.133803	1.0e-04	9.9e-04	3.4e-02	2.50815	7.97399	20	0.0876263	0.21978	54	1.1e-03	8.3e-03	5.0e+00	2.17472	8.73677	19	0.0171171
DNAm Beta-2-microglobulin	GO Biological Process	GO:0002711	positive regulation of T cell mediated immunity	39	0.0140845	1.1e-04	1.0e-03	3.6e-02	16.5675	0.241436	4	0.00265315	0.043956	592	3.8e-02	4.9e-02	5.2e+00	6.51535	0.306968	2	0.0512821
DNAm Beta-2-microglobulin	GO Biological Process	GO:1901213	regulation of transcription from RNA polymerase II promoter involved in heart development	12	0.0140845	1.1e-04	1.1e-03	3.8e-02	16.3839	0.244142	4	0.00268288	0.043956	151	3.9e-03	1.0e-02	2.6e+00	21.1749	0.0944515	2	0.166667
DNAm Beta-2-microglobulin	GO Biological Process	GO:0002474	antigen processing and presentation of peptide antigen via MHC class I	100	0.0211268	1.2e-04	1.1e-03	3.9e-02	10.628	0.470456	5	0.00516985	0.0549451	661	4.4e-02	5.6e-02	6.8e+01	3.81148	0.787096	3	0.03
DNAm Beta-2-microglobulin	GO Biological Process	GO:0045638	negative regulation of myeloid cell differentiation	78	0.028169	1.4e-04	1.2e-03	4.5e-02	7.74797	0.774396	6	0.00850985	0.0659341	134	3.3e-03	1.0e-02	7.0e+00	6.51535	0.613935	4	0.0512821
DNAm Beta-2-microglobulin	GO Biological Process	GO:0050776	regulation of immune response	698	0.0985916	1.5e-04	1.3e-03	4.9e-02	2.82659	5.66054	16	0.0622037	0.175824	58	1.2e-03	8.3e-03	2.6e+00	2.54827	5.49393	14	0.0200573
DNAm Beta-2-microglobulin	GO Biological Process	GO:0002067	glandular epithelial cell differentiation	27	0.0352113	1.8e-04	1.5e-03	5.9e-02	9.73962	0.513367	5	0.0056414	0.0549451	1	2.0e-06	6.5e-04	2.8e+01	23.5277	0.212516	5	0.185185
DNAm Beta-2-microglobulin	GO Biological Process	GO:0031935	regulation of chromatin silencing	12	0.00704225	2.4e-04	2.0e-03	8.0e-02	25.4328	0.117958	3	0.00129624	0.032967	1057	9.0e-02	1.0e-01	3.0e+00	10.5874	0.0944515	1	0.0833333
DNAm Beta-2-microglobulin	GO Biological Process	GO:0051093	negative regulation of developmental process	605	0.0985916	2.9e-04	2.3e-03	9.5e-02	2.47257	7.27986	18	0.0799985	0.197802	19	3.0e-04	5.6e-03	1.1e+01	2.93998	4.76193	14	0.0231405
DNAm Beta-2-microglobulin	GO Biological Process	GO:0035883	enteroendocrine cell differentiation	16	0.028169	3.2e-04	2.4e-03	1.0e-01	12.5358	0.319087	4	0.00350645	0.043956	2	6.2e-06	1.0e-03	6.6e+01	31.7623	0.125935	4	0.25
DNAm Beta-2-microglobulin	GO Biological Process	GO:0060391	positive regulation of SMAD protein import into nucleus	10	0.00704225	3.4e-04	2.5e-03	1.1e-01	22.7602	0.131809	3	0.00144845	0.032967	919	7.6e-02	8.9e-02	1.2e+01	12.7049	0.0787096	1	0.1
DNAm Beta-2-microglobulin	GO Biological Process	GO:0032446	protein modification by small protein conjugation	546	0.0704225	3.5e-04	2.6e-03	1.2e-01	3.02153	4.30245	13	0.0472797	0.142857	279	1.1e-02	2.1e-02	8.2e+00	2.32691	4.29754	10	0.018315
DNAm Beta-2-microglobulin	GO Biological Process	GO:0071156	regulation of cell cycle arrest	98	0.0352113	3.7e-04	2.6e-03	1.2e-01	8.30257	0.602223	5	0.00661783	0.0549451	52	1.1e-03	8.1e-03	7.0e+00	6.48211	0.771354	5	0.0510204
DNAm Beta-2-microglobulin	GO Biological Process	GO:0042659	regulation of cell fate specification	18	0.0140845	4.0e-04	2.8e-03	1.3e-01	11.7953	0.339119	4	0.00372658	0.043956	253	8.7e-03	1.7e-02	2.3e+00	14.1166	0.141677	2	0.111111
DNAm Beta-2-microglobulin	GO Biological Process	GO:0060390	regulation of SMAD protein import into nucleus	12	0.00704225	4.1e-04	2.8e-03	1.3e-01	21.3077	0.140794	3	0.00154719	0.032967	1057	9.0e-02	1.0e-01	3.0e+01	10.5874	0.0944515	1	0.0833333
DNAm Beta-2-microglobulin	GO Biological Process	GO:0006950	response to stress	2962	0.253521	4.1e-04	2.8e-03	1.4e-01	1.67447	22.0966	37	0.242819	0.406593	162	4.2e-03	1.1e-02	2.5e+01	1.54415	23.3138	36	0.012154
DNAm Beta-2-microglobulin	GO Biological Process	GO:0002709	regulation of T cell mediated immunity	51	0.0140845	4.4e-04	2.9e-03	1.5e-01	11.4526	0.349267	4	0.0038381	0.043956	798	6.1e-02	7.5e-02	5.7e+01	4.98233	0.401419	2	0.0392157
DNAm Beta-2-microglobulin	GO Biological Process	GO:0060795	cell fate commitment involved in formation of primary germ layer	26	0.0140845	4.5e-04	2.9e-03	1.5e-01	11.4256	0.350091	4	0.00384716	0.043956	389	1.8e-02	2.7e-02	4.2e+01	9.77302	0.204645	2	0.0769231
DNAm Beta-2-microglobulin	GO Biological Process	GO:0019827	stem cell maintenance	98	0.028169	4.5e-04	2.9e-03	1.5e-01	5.14496	1.36055	7	0.0149511	0.0769231	216	7.5e-03	1.5e-02	3.2e+01	5.18569	0.771354	4	0.0408163
DNAm Beta-2-microglobulin	GO Biological Process	GO:0002504	antigen processing and presentation of peptide or polysaccharide antigen via MHC class II	97	0.0140845	5.3e-04	3.3e-03	1.8e-01	7.64652	0.653892	5	0.00718563	0.0549451	1539	1.8e-01	1.8e-01	2.8e+01	2.61957	0.763483	2	0.0206186
DNAm Beta-2-microglobulin	GO Biological Process	GO:0002706	regulation of lymphocyte mediated immunity	94	0.0211268	5.4e-04	3.3e-03	1.8e-01	7.62033	0.65614	5	0.00721033	0.0549451	597	3.8e-02	5.0e-02	3.0e+01	4.05476	0.73987	3	0.0319149
DNAm Beta-2-microglobulin	GO Biological Process	GO:0051254	positive regulation of RNA metabolic process	1136	0.147887	5.9e-04	3.6e-03	2.0e-01	1.95773	12.7699	25	0.140329	0.274725	14	2.2e-04	5.6e-03	6.8e+00	2.34862	8.94141	21	0.0184859
DNAm Beta-2-microglobulin	GO Biological Process	GO:0002824	positive regulation of adaptive immune response based on somatic recombination of immune receptors built from immunoglobulin superfamily domains	58	0.0140845	6.2e-04	3.7e-03	2.1e-01	10.4511	0.382736	4	0.00420589	0.043956	957	7.6e-02	8.9e-02	3.5e+00	4.38101	0.456516	2	0.0344828
DNAm Beta-2-microglobulin	GO Biological Process	GO:0016567	protein ubiquitination	511	0.0633803	6.6e-04	3.8e-03	2.2e-01	2.99532	4.00624	12	0.0440246	0.131868	405	2.0e-02	3.0e-02	3.7e+01	2.23766	4.02206	9	0.0176125
DNAm Beta-2-microglobulin	GO Biological Process	GO:0006513	protein monoubiquitination	38	0.0140845	6.6e-04	3.8e-03	2.2e-01	10.3005	0.388331	4	0.00426738	0.043956	589	3.6e-02	4.8e-02	3.9e+01	6.6868	0.299096	2	0.0526316
DNAm Beta-2-microglobulin	GO Biological Process	GO:0009952	anterior/posterior pattern specification	195	0.056338	7.6e-04	4.3e-03	2.5e-01	3.69812	2.43367	9	0.0267436	0.0989011	10	1.6e-04	4.5e-03	2.0e+02	5.21228	1.53484	8	0.0410256
DNAm Beta-2-microglobulin	GO Biological Process	GO:0060828	regulation of canonical Wnt receptor signaling pathway	136	0.0422535	8.0e-04	4.4e-03	2.6e-01	4.08836	1.95678	8	0.021503	0.0879121	35	7.3e-04	7.6e-03	5.5e+01	5.60512	1.07045	6	0.0441177
DNAm Beta-2-microglobulin	GO Biological Process	GO:0060968	regulation of gene silencing	31	0.00704225	8.5e-04	4.6e-03	2.8e-01	16.5245	0.181549	3	0.00199504	0.032967	1702	2.2e-01	2.2e-01	2.8e+01	4.09836	0.244	1	0.0322581
DNAm Beta-2-microglobulin	GO Biological Process	GO:0001704	formation of primary germ layer	84	0.028169	8.7e-04	4.7e-03	2.9e-01	5.44597	1.10173	6	0.012107	0.0659341	166	4.4e-03	1.1e-02	2.8e+01	6.04997	0.661161	4	0.0476191
DNAm Beta-2-microglobulin	GO Biological Process	GO:0002821	positive regulation of adaptive immune response	61	0.0140845	9.3e-04	4.9e-03	3.1e-01	9.39057	0.425959	4	0.00468087	0.043956	1028	8.3e-02	9.5e-02	3.0e+01	4.16555	0.480129	2	0.0327869
DNAm Beta-2-microglobulin	GO Biological Process	GO:0002376	immune system process	1789	0.176056	9.7e-04	5.0e-03	3.2e-01	1.8597	13.9808	26	0.153635	0.285714	126	3.2e-03	1.0e-02	5.3e+01	1.77542	14.0811	25	0.0139743
DNAm Beta-2-microglobulin	GO Biological Process	GO:0003156	regulation of organ formation	33	0.0211268	1.0e-03	5.2e-03	3.4e-01	6.61281	0.756108	5	0.00830888	0.0549451	97	2.2e-03	9.3e-03	5.5e+01	11.5499	0.259742	3	0.0909091
DNAm Beta-2-microglobulin	GO Biological Process	GO:0045087	innate immune response	731	0.084507	1.0e-03	5.2e-03	3.4e-01	2.5675	5.45277	14	0.0599206	0.153846	305	1.3e-02	2.2e-02	2.5e+01	2.08562	5.75367	12	0.0164159
DNAm Beta-2-microglobulin	GO Biological Process	GO:0010453	regulation of cell fate commitment	28	0.0140845	1.1e-03	5.5e-03	3.7e-01	8.90423	0.449225	4	0.00493654	0.043956	407	2.0e-02	3.0e-02	4.4e+01	9.07495	0.220387	2	0.0714286
DNAm Beta-2-microglobulin	GO Biological Process	GO:0042108	positive regulation of cytokine biosynthetic process	60	0.028169	1.1e-03	5.5e-03	3.8e-01	8.86583	0.451171	4	0.00495792	0.043956	61	1.3e-03	8.3e-03	2.5e+01	8.46995	0.472258	4	0.0666667
DNAm Beta-2-microglobulin	GO Biological Process	GO:0060338	regulation of type I interferon-mediated signaling pathway	37	0.0211268	1.2e-03	5.5e-03	3.9e-01	14.7741	0.203058	3	0.00223141	0.032967	121	3.0e-03	1.0e-02	4.6e+01	10.3013	0.291226	3	0.0810811
DNAm Beta-2-microglobulin	GO Biological Process	GO:2000826	regulation of heart morphogenesis	20	0.0140845	1.2e-03	5.5e-03	3.9e-01	8.82144	0.453441	4	0.00498287	0.043956	273	1.1e-02	2.0e-02	4.6e+01	12.7049	0.157419	2	0.1
DNAm Beta-2-microglobulin	GO Biological Process	GO:0001709	cell fate determination	40	0.0211268	1.2e-03	5.5e-03	3.9e-01	6.39814	0.781477	5	0.00858766	0.0549451	147	3.8e-03	1.0e-02	3.9e+01	9.5287	0.314838	3	0.075
DNAm Beta-2-microglobulin	GO Biological Process	GO:0070647	protein modification by small protein conjugation or removal	622	0.0704225	1.2e-03	5.6e-03	4.0e-01	2.64405	4.9167	13	0.0540297	0.142857	499	2.5e-02	3.6e-02	3.7e+01	2.04259	4.89574	10	0.0160772
DNAm Beta-2-microglobulin	GO Biological Process	GO:0060911	cardiac cell fate commitment	11	0.00704225	1.3e-03	5.9e-03	4.3e-01	14.1924	0.211381	3	0.00232287	0.032967	988	8.3e-02	9.5e-02	3.9e+01	11.5499	0.0865806	1	0.0909091
DNAm Beta-2-microglobulin	GO Biological Process	GO:0051173	positive regulation of nitrogen compound metabolic process	1300	0.15493	1.3e-03	6.0e-03	4.4e-01	1.81989	14.2866	26	0.156996	0.285714	23	5.2e-04	7.6e-03	4.2e+01	2.15007	10.2323	22	0.0169231
DNAm Beta-2-microglobulin	GO Biological Process	GO:0007369	gastrulation	126	0.0352113	1.4e-03	6.0e-03	4.5e-01	4.24922	1.64736	7	0.0181029	0.0769231	124	3.2e-03	1.0e-02	2.5e+01	5.04164	0.991741	5	0.0396825
DNAm Beta-2-microglobulin	GO Biological Process	GO:0002703	regulation of leukocyte mediated immunity	117	0.0211268	1.4e-03	6.0e-03	4.6e-01	6.16825	0.810603	5	0.00890772	0.0549451	852	6.5e-02	7.9e-02	1.8e+01	3.25767	0.920902	3	0.025641
DNAm Beta-2-microglobulin	GO Biological Process	GO:0071158	positive regulation of cell cycle arrest	83	0.028169	1.8e-03	7.5e-03	5.8e-01	7.88763	0.507123	4	0.00557278	0.043956	163	4.2e-03	1.1e-02	2.5e+01	6.12286	0.65329	4	0.0481928
DNAm Beta-2-microglobulin	GO Biological Process	GO:0050678	regulation of epithelial cell proliferation	219	0.0704225	2.1e-03	8.9e-03	6.9e-01	2.95307	3.38631	10	0.0372122	0.10989	3	9.3e-06	1.0e-03	1.7e+01	5.80134	1.72374	10	0.0456621
DNAm Beta-2-microglobulin	GO Biological Process	GO:0045595	regulation of cell differentiation	1138	0.15493	2.2e-03	9.1e-03	7.2e-01	1.78858	13.9776	25	0.1536	0.274725	7	8.0e-05	4.4e-03	4.2e+01	2.45614	8.95715	22	0.0193322
DNAm Beta-2-microglobulin	GO Biological Process	GO:0050778	positive regulation of immune response	420	0.056338	2.2e-03	9.2e-03	7.4e-01	2.92831	3.41493	10	0.0375267	0.10989	396	1.8e-02	2.8e-02	3.9e+01	2.41999	3.3058	8	0.0190476
DNAm Beta-2-microglobulin	GO Biological Process	GO:0042981	regulation of apoptotic process	1159	0.140845	2.3e-03	9.3e-03	7.5e-01	1.9228	10.9216	21	0.120017	0.230769	36	7.5e-04	7.6e-03	3.7e+01	2.19239	9.12244	20	0.0172563
DNAm Beta-2-microglobulin	GO Biological Process	GO:0045935	positive regulation of nucleobase-containing compound metabolic process	1273	0.147887	2.3e-03	9.4e-03	7.7e-01	1.77988	14.0459	25	0.154351	0.274725	49	9.8e-04	7.9e-03	3.7e+01	2.09586	10.0197	21	0.0164965
DNAm Beta-2-microglobulin	GO Biological Process	GO:0002478	antigen processing and presentation of exogenous peptide antigen	164	0.028169	2.3e-03	9.4e-03	7.8e-01	5.45811	0.916068	5	0.0100667	0.0549451	641	4.1e-02	5.3e-02	1.7e+01	3.09876	1.29084	4	0.0243902
DNAm Beta-2-microglobulin	GO Biological Process	GO:0090092	regulation of transmembrane receptor protein serine/threonine kinase signaling pathway	166	0.0352113	2.4e-03	9.4e-03	7.9e-01	3.43372	2.32983	8	0.0256026	0.0879121	270	1.0e-02	1.9e-02	5.9e+01	3.82679	1.30658	5	0.0301205
DNAm Beta-2-microglobulin	GO Biological Process	GO:0006952	defense response	1231	0.112676	2.6e-03	9.9e-03	8.5e-01	2.04537	8.80034	18	0.0967071	0.197802	573	3.3e-02	4.4e-02	2.7e+01	1.65133	9.68915	16	0.0129976
DNAm Beta-2-microglobulin	GO Biological Process	GO:0043067	regulation of programmed cell death	1171	0.140845	2.6e-03	1.0e-02	8.6e-01	1.90148	11.044	21	0.121363	0.230769	42	8.6e-04	7.7e-03	1.6e+01	2.16993	9.21689	20	0.0170794
DNAm Beta-2-microglobulin	GO Biological Process	GO:0002065	columnar/cuboidal epithelial cell differentiation	76	0.0422535	2.6e-03	1.0e-02	8.8e-01	4.36658	1.37407	6	0.0150997	0.0659341	4	3.0e-05	2.5e-03	3.2e+01	10.0302	0.598193	6	0.0789474
DNAm Beta-2-microglobulin	GO Biological Process	GO:0019884	antigen processing and presentation of exogenous antigen	171	0.028169	2.7e-03	1.0e-02	9.0e-01	5.26864	0.949011	5	0.0104287	0.0549451	669	4.6e-02	5.8e-02	1.4e+01	2.97191	1.34593	4	0.0233918
DNAm Beta-2-microglobulin	GO Biological Process	GO:0002068	glandular epithelial cell development	13	0.0211268	2.8e-03	1.0e-02	9.2e-01	10.8716	0.275948	3	0.00303239	0.032967	9	1.3e-04	4.5e-03	2.8e+01	29.3191	0.102322	3	0.230769
DNAm Beta-2-microglobulin	GO Biological Process	GO:0010628	positive regulation of gene expression	1165	0.140845	2.9e-03	1.1e-02	9.6e-01	1.78176	13.4698	24	0.14802	0.263736	41	8.0e-04	7.6e-03	2.1e+01	2.1811	9.16967	20	0.0171674
DNAm Beta-2-microglobulin	GO Biological Process	GO:0031347	regulation of defense response	466	0.0704225	3.1e-03	1.1e-02	1.0e+00	2.78968	3.58464	10	0.0393917	0.10989	150	3.8e-03	1.0e-02	3.0e+01	2.72638	3.66787	10	0.0214592
DNAm Beta-2-microglobulin	GO Biological Process	GO:0010604	positive regulation of macromolecule metabolic process	1997	0.197183	3.1e-03	1.1e-02	1.0e+00	1.58715	20.1619	32	0.22156	0.351648	75	1.7e-03	9.3e-03	2.8e+01	1.78136	15.7183	28	0.014021
DNAm Beta-2-microglobulin	GO Biological Process	GO:0016570	histone modification	271	0.0422535	3.3e-03	1.2e-02	1.1e+00	3.25418	2.45838	8	0.0270151	0.0879121	415	2.0e-02	3.0e-02	3.7e+01	2.8129	2.13303	6	0.0221402
DNAm Beta-2-microglobulin	GO Biological Process	GO:0003309	type B pancreatic cell differentiation	14	0.0211268	3.3e-03	1.2e-02	1.1e+00	10.2122	0.293766	3	0.0032282	0.032967	11	1.6e-04	4.5e-03	7.0e+01	27.2248	0.110193	3	0.214286
DNAm Beta-2-microglobulin	GO Biological Process	GO:0032651	regulation of interleukin-1 beta production	36	0.0211268	3.4e-03	1.2e-02	1.1e+00	10.1037	0.29692	3	0.00326286	0.032967	118	2.8e-03	1.0e-02	4.2e+01	10.5874	0.283355	3	0.0833333
DNAm Beta-2-microglobulin	GO Biological Process	GO:0001947	heart looping	51	0.028169	3.4e-03	1.2e-02	1.1e+00	6.54183	0.61145	4	0.00671923	0.043956	33	6.9e-04	7.6e-03	6.2e+01	9.96465	0.401419	4	0.0784314
DNAm Beta-2-microglobulin	GO Biological Process	GO:0016569	covalent chromatin modification	274	0.0422535	3.5e-03	1.2e-02	1.2e+00	3.21921	2.48508	8	0.0273086	0.0879121	424	2.1e-02	3.1e-02	6.8e+01	2.7821	2.15664	6	0.0218978
DNAm Beta-2-microglobulin	GO Biological Process	GO:0051704	multi-organism process	1375	0.119718	3.6e-03	1.2e-02	1.2e+00	1.93423	9.82303	19	0.107945	0.208791	650	4.2e-02	5.4e-02	5.3e+01	1.57079	10.8226	17	0.0123636
DNAm Beta-2-microglobulin	GO Biological Process	GO:0010557	positive regulation of macromolecule biosynthetic process	1268	0.140845	3.6e-03	1.2e-02	1.2e+00	1.7512	13.7049	24	0.150603	0.263736	101	2.2e-03	9.3e-03	3.7e+01	2.00393	9.98038	20	0.0157729
DNAm Beta-2-microglobulin	GO Biological Process	GO:0031328	positive regulation of cellular biosynthetic process	1357	0.147887	3.7e-03	1.2e-02	1.2e+00	1.72176	14.52	25	0.159561	0.274725	96	2.2e-03	9.3e-03	4.2e+01	1.96613	10.6809	21	0.0154753
DNAm Beta-2-microglobulin	GO Biological Process	GO:0061371	determination of heart left/right asymmetry	54	0.028169	3.8e-03	1.2e-02	1.3e+00	6.36192	0.628741	4	0.00690924	0.043956	43	8.6e-04	7.7e-03	3.1e+01	9.41106	0.425032	4	0.0740741
DNAm Beta-2-microglobulin	GO Biological Process	GO:0048002	antigen processing and presentation of peptide antigen	181	0.028169	4.0e-03	1.3e-02	1.3e+00	4.81239	1.03899	5	0.0114174	0.0549451	781	5.5e-02	6.9e-02	4.6e+01	2.80772	1.42464	4	0.0220994
DNAm Beta-2-microglobulin	GO Biological Process	GO:0001666	response to hypoxia	221	0.0492958	4.1e-03	1.3e-02	1.3e+00	3.4908	2.00527	7	0.0220359	0.0769231	81	1.9e-03	9.3e-03	6.8e+01	4.02419	1.73948	7	0.0316742
DNAm Beta-2-microglobulin	GO Biological Process	GO:0010941	regulation of cell death	1210	0.140845	4.1e-03	1.3e-02	1.4e+00	1.82878	11.4831	21	0.126188	0.230769	62	1.3e-03	8.3e-03	3.7e+01	2.09999	9.52386	20	0.0165289
DNAm Beta-2-microglobulin	GO Biological Process	GO:0071345	cellular response to cytokine stimulus	435	0.0492958	4.4e-03	1.4e-02	1.5e+00	2.85247	3.15516	9	0.0346721	0.0989011	783	5.7e-02	7.0e-02	3.7e+01	2.04447	3.42387	7	0.016092
DNAm Beta-2-microglobulin	GO Biological Process	GO:0009893	positive regulation of metabolic process	2153	0.204225	4.4e-03	1.4e-02	1.5e+00	1.53801	21.4562	33	0.235783	0.362637	109	2.5e-03	9.7e-03	3.3e+01	1.7113	16.9462	29	0.0134696
DNAm Beta-2-microglobulin	GO Biological Process	GO:0036293	response to decreased oxygen levels	224	0.0492958	4.5e-03	1.4e-02	1.5e+00	3.42358	2.04465	7	0.0224686	0.0769231	85	2.0e-03	9.3e-03	2.1e+01	3.97029	1.7631	7	0.03125
DNAm Beta-2-microglobulin	GO Biological Process	GO:0009891	positive regulation of biosynthetic process	1380	0.147887	4.5e-03	1.4e-02	1.5e+00	1.69477	14.7513	25	0.162102	0.274725	112	2.6e-03	9.8e-03	5.3e+01	1.93336	10.8619	21	0.0152174
DNAm Beta-2-microglobulin	GO Biological Process	GO:0043065	positive regulation of apoptotic process	343	0.0633803	4.5e-03	1.4e-02	1.5e+00	2.64812	3.77626	10	0.0414973	0.10989	69	1.6e-03	9.3e-03	4.8e+01	3.33365	2.69974	9	0.0262391
DNAm Beta-2-microglobulin	GO Biological Process	GO:0032332	positive regulation of chondrocyte differentiation	16	0.0140845	4.7e-03	1.4e-02	1.6e+00	9.0008	0.333304	3	0.00366268	0.032967	205	6.9e-03	1.5e-02	2.1e+01	15.8812	0.125935	2	0.125
DNAm Beta-2-microglobulin	GO Biological Process	GO:0060039	pericardium development	17	0.0211268	4.7e-03	1.4e-02	1.6e+00	8.96949	0.334467	3	0.00367546	0.032967	18	3.0e-04	5.6e-03	2.1e+01	22.4205	0.133806	3	0.176471
DNAm Beta-2-microglobulin	GO Biological Process	GO:0043068	positive regulation of programmed cell death	350	0.0633803	4.7e-03	1.4e-02	1.6e+00	2.63083	3.80107	10	0.0417701	0.10989	80	1.8e-03	9.3e-03	1.9e+02	3.26698	2.75484	9	0.0257143
DNAm Beta-2-microglobulin	GO Biological Process	GO:0045086	positive regulation of interleukin-2 biosynthetic process	13	0.0140845	4.8e-03	1.4e-02	1.6e+00	19.7237	0.101401	2	0.00111429	0.021978	170	4.5e-03	1.1e-02	5.6e+01	19.5461	0.102322	2	0.153846
DNAm Beta-2-microglobulin	GO Biological Process	GO:0045893	positive regulation of transcription, DNA-dependent	1074	0.126761	4.9e-03	1.4e-02	1.6e+00	1.76857	12.4395	22	0.136697	0.241758	84	1.9e-03	9.3e-03	1.6e+02	2.12932	8.45341	18	0.0167598
DNAm Beta-2-microglobulin	GO Biological Process	GO:0006366	transcription from RNA polymerase II promoter	506	0.0704225	5.0e-03	1.5e-02	1.7e+00	2.34218	5.12343	12	0.0563015	0.131868	204	6.8e-03	1.5e-02	3.9e+01	2.51086	3.98271	10	0.0197628
DNAm Beta-2-microglobulin	GO Biological Process	GO:0061036	positive regulation of cartilage development	12	0.0140845	5.1e-03	1.5e-02	1.7e+00	8.71442	0.344257	3	0.00378304	0.032967	151	3.9e-03	1.0e-02	1.6e+02	21.1749	0.0944515	2	0.166667
DNAm Beta-2-microglobulin	GO Biological Process	GO:0001759	organ induction	20	0.00704225	5.2e-03	1.5e-02	1.7e+00	8.68194	0.345545	3	0.0037972	0.032967	1395	1.5e-01	1.5e-01	7.4e+01	6.35246	0.157419	1	0.05
DNAm Beta-2-microglobulin	GO Biological Process	GO:0046782	regulation of viral transcription	67	0.0211268	5.4e-03	1.5e-02	1.8e+00	8.5407	0.351259	3	0.00385999	0.032967	380	1.6e-02	2.5e-02	3.2e+01	5.68877	0.527354	3	0.0447761
DNAm Beta-2-microglobulin	GO Biological Process	GO:2000026	regulation of multicellular organismal development	1196	0.15493	5.4e-03	1.5e-02	1.8e+00	1.67171	14.9548	25	0.164338	0.274725	13	1.6e-04	4.5e-03	4.2e+01	2.33703	9.41367	22	0.0183946
DNAm Beta-2-microglobulin	GO Biological Process	GO:0045136	development of secondary sexual characteristics	12	0.0140845	5.5e-03	1.5e-02	1.8e+00	18.2691	0.109475	2	0.00120302	0.021978	151	3.9e-03	1.0e-02	8.2e+01	21.1749	0.0944515	2	0.166667
DNAm Beta-2-microglobulin	GO Biological Process	GO:0019221	cytokine-mediated signaling pathway	321	0.0352113	5.5e-03	1.5e-02	1.8e+00	3.29719	2.12302	7	0.0233299	0.0769231	1195	1.1e-01	1.2e-01	4.2e+00	1.97896	2.52658	5	0.0155763
DNAm Beta-2-microglobulin	GO Biological Process	GO:0002066	columnar/cuboidal epithelial cell development	22	0.0211268	5.6e-03	1.5e-02	1.8e+00	8.45895	0.354654	3	0.00389729	0.032967	30	6.6e-04	7.6e-03	6.4e+01	17.3249	0.173161	3	0.136364
DNAm Beta-2-microglobulin	GO Biological Process	GO:0019882	antigen processing and presentation	207	0.028169	5.6e-03	1.5e-02	1.8e+00	4.4428	1.12542	5	0.0123672	0.0549451	977	8.1e-02	9.3e-02	4.8e+01	2.45506	1.62929	4	0.0193237
DNAm Beta-2-microglobulin	GO Biological Process	GO:0032652	regulation of interleukin-1 production	40	0.0211268	5.6e-03	1.5e-02	1.9e+00	8.43014	0.355866	3	0.00391061	0.032967	147	3.8e-03	1.0e-02	3.6e+01	9.5287	0.314838	3	0.075
DNAm Beta-2-microglobulin	GO Biological Process	GO:0003143	embryonic heart tube morphogenesis	57	0.028169	5.9e-03	1.6e-02	1.9e+00	5.60937	0.713093	4	0.00783619	0.043956	51	1.1e-03	8.1e-03	8.8e+01	8.91574	0.448645	4	0.0701754
DNAm Beta-2-microglobulin	GO Biological Process	GO:0017145	stem cell division	28	0.0140845	5.9e-03	1.6e-02	2.0e+00	8.27715	0.362443	3	0.0039829	0.032967	407	2.0e-02	3.0e-02	2.9e+00	9.07495	0.220387	2	0.0714286
DNAm Beta-2-microglobulin	GO Biological Process	GO:0070482	response to oxygen levels	237	0.0492958	6.0e-03	1.6e-02	2.0e+00	3.25127	2.153	7	0.0236594	0.0769231	116	2.7e-03	9.9e-03	3.9e+01	3.75251	1.86542	7	0.0295359
DNAm Beta-2-microglobulin	GO Biological Process	GO:0010942	positive regulation of cell death	370	0.0633803	6.1e-03	1.6e-02	2.0e+00	2.53911	3.93839	10	0.043279	0.10989	114	2.7e-03	9.8e-03	1.3e+02	3.09039	2.91226	9	0.0243243
DNAm Beta-2-microglobulin	GO Biological Process	GO:0010721	negative regulation of cell development	122	0.0422535	6.2e-03	1.6e-02	2.1e+00	3.65611	1.64109	6	0.018034	0.0659341	21	4.1e-04	6.8e-03	6.7e+01	6.24833	0.960257	6	0.0491803
DNAm Beta-2-microglobulin	GO Biological Process	GO:0042640	anagen	11	0.0140845	6.4e-03	1.6e-02	2.1e+00	16.9021	0.118328	2	0.00130031	0.021978	127	3.2e-03	1.0e-02	6.8e+01	23.0999	0.0865806	2	0.181818
DNAm Beta-2-microglobulin	GO Biological Process	GO:0002684	positive regulation of immune system process	608	0.0704225	6.5e-03	1.6e-02	2.1e+00	2.26812	5.29072	12	0.0581398	0.131868	431	2.2e-02	3.2e-02	5.9e+01	2.08963	4.78554	10	0.0164474
DNAm Beta-2-microglobulin	GO Biological Process	GO:0001708	cell fate specification	65	0.0211268	6.5e-03	1.6e-02	2.1e+00	4.28456	1.16698	5	0.012824	0.0549451	322	1.5e-02	2.5e-02	7.6e+01	5.86381	0.511612	3	0.0461539
DNAm Beta-2-microglobulin	GO Biological Process	GO:0034122	negative regulation of toll-like receptor signaling pathway	19	0.0140845	6.7e-03	1.7e-02	2.2e+00	16.4882	0.121299	2	0.00133296	0.021978	263	9.6e-03	1.9e-02	5.9e+01	13.3736	0.149548	2	0.105263
DNAm Beta-2-microglobulin	GO Biological Process	GO:0045637	regulation of myeloid cell differentiation	158	0.028169	6.8e-03	1.7e-02	2.2e+00	3.59037	1.67114	6	0.0183641	0.0659341	590	3.6e-02	4.8e-02	3.9e+00	3.21644	1.24361	4	0.0253165
DNAm Beta-2-microglobulin	GO Biological Process	GO:0001817	regulation of cytokine production	437	0.0633803	6.8e-03	1.7e-02	2.3e+00	2.66074	3.38252	9	0.0371705	0.0989011	219	7.8e-03	1.6e-02	8.0e+01	2.61658	3.43961	9	0.020595
DNAm Beta-2-microglobulin	GO Biological Process	GO:0031325	positive regulation of cellular metabolic process	2039	0.190141	6.8e-03	1.7e-02	2.3e+00	1.52715	20.2992	31	0.223068	0.340659	174	4.6e-03	1.1e-02	4.6e+01	1.68236	16.0489	27	0.0132418
DNAm Beta-2-microglobulin	GO Biological Process	GO:0006351	transcription, DNA-dependent	2414	0.197183	7.0e-03	1.7e-02	2.3e+00	1.5248	20.3305	31	0.223412	0.340659	425	2.2e-02	3.2e-02	1.3e+01	1.47365	19.0005	28	0.011599
DNAm Beta-2-microglobulin	GO Biological Process	GO:0090101	negative regulation of transmembrane receptor protein serine/threonine kinase signaling pathway	97	0.028169	7.1e-03	1.7e-02	2.4e+00	4.18897	1.19361	5	0.0131166	0.0549451	213	7.2e-03	1.5e-02	5.7e+01	5.23915	0.763483	4	0.0412371
DNAm Beta-2-microglobulin	GO Biological Process	GO:0051726	regulation of cell cycle	709	0.0985916	7.1e-03	1.7e-02	2.4e+00	2.07362	6.75146	14	0.0741919	0.153846	65	1.4e-03	8.7e-03	2.2e+01	2.50873	5.58051	14	0.0197461
DNAm Beta-2-microglobulin	GO Biological Process	GO:0030111	regulation of Wnt receptor signaling pathway	193	0.0422535	7.2e-03	1.7e-02	2.4e+00	2.8498	2.80721	8	0.0308485	0.0879121	165	4.3e-03	1.1e-02	9.4e+01	3.94972	1.5191	6	0.0310881
DNAm Beta-2-microglobulin	GO Biological Process	GO:0045076	regulation of interleukin-2 biosynthetic process	19	0.0140845	7.5e-03	1.8e-02	2.5e+00	15.5531	0.128592	2	0.0014131	0.021978	263	9.6e-03	1.9e-02	1.1e+02	13.3736	0.149548	2	0.105263
DNAm Beta-2-microglobulin	GO Biological Process	GO:0051817	modification of morphology or physiology of other organism involved in symbiotic interaction	378	0.0422535	7.5e-03	1.8e-02	2.5e+00	2.8271	2.82976	8	0.0310962	0.0879121	966	7.9e-02	9.1e-02	9.7e+01	2.01666	2.97522	6	0.015873
DNAm Beta-2-microglobulin	GO Biological Process	GO:0045778	positive regulation of ossification	40	0.0211268	7.9e-03	1.8e-02	2.6e+00	5.14813	0.776982	4	0.00853826	0.043956	147	3.8e-03	1.0e-02	1.1e+02	9.5287	0.314838	3	0.075
DNAm Beta-2-microglobulin	GO Biological Process	GO:0042307	positive regulation of protein import into nucleus	71	0.0140845	8.0e-03	1.8e-02	2.6e+00	5.13209	0.779409	4	0.00856494	0.043956	1186	1.1e-01	1.2e-01	8.8e+01	3.57885	0.558838	2	0.028169
DNAm Beta-2-microglobulin	GO Biological Process	GO:0001701	in utero embryonic development	352	0.0633803	8.0e-03	1.8e-02	2.6e+00	2.43597	4.10514	10	0.0451114	0.10989	83	1.9e-03	9.3e-03	1.1e+02	3.24842	2.77058	9	0.0255682
DNAm Beta-2-microglobulin	GO Biological Process	GO:0035821	modification of morphology or physiology of other organism	391	0.0422535	8.1e-03	1.8e-02	2.7e+00	2.79168	2.86566	8	0.0314908	0.0879121	1050	8.9e-02	1.0e-01	5.9e+01	1.94961	3.07755	6	0.0153453
DNAm Beta-2-microglobulin	GO Biological Process	GO:0010948	negative regulation of cell cycle process	216	0.0422535	8.3e-03	1.9e-02	2.8e+00	3.43375	1.74736	6	0.0192018	0.0659341	214	7.3e-03	1.5e-02	8.9e+01	3.52915	1.70013	6	0.0277778
DNAm Beta-2-microglobulin	GO Biological Process	GO:0002822	regulation of adaptive immune response based on somatic recombination of immune receptors built from immunoglobulin superfamily domains	103	0.0140845	8.4e-03	1.9e-02	2.8e+00	5.05442	0.791387	4	0.00869656	0.043956	1623	1.9e-01	2.0e-01	4.4e+01	2.46698	0.810709	2	0.0194175
DNAm Beta-2-microglobulin	GO Biological Process	GO:0090288	negative regulation of cellular response to growth factor stimulus	91	0.028169	8.4e-03	1.9e-02	2.8e+00	4.01528	1.24524	5	0.013684	0.0549451	190	5.8e-03	1.3e-02	8.0e+01	5.58458	0.716257	4	0.043956
DNAm Beta-2-microglobulin	GO Biological Process	GO:0032774	RNA biosynthetic process	2506	0.197183	8.8e-03	1.9e-02	2.9e+00	1.5016	20.6447	31	0.226865	0.340659	575	3.3e-02	4.5e-02	7.2e+01	1.41955	19.7246	28	0.0111732
DNAm Beta-2-microglobulin	GO Biological Process	GO:0051239	regulation of multicellular organismal process	1982	0.204225	9.2e-03	2.0e-02	3.1e+00	1.48206	21.5916	32	0.23727	0.351648	34	7.0e-04	7.6e-03	9.9e+01	1.85895	15.6002	29	0.0146317
DNAm Beta-2-microglobulin	GO Biological Process	GO:0050727	regulation of inflammatory response	212	0.0422535	9.6e-03	2.1e-02	3.2e+00	3.32907	1.80231	6	0.0198055	0.0659341	202	6.7e-03	1.5e-02	1.0e+02	3.59573	1.66864	6	0.0283019
DNAm Beta-2-microglobulin	GO Biological Process	GO:2000736	regulation of stem cell differentiation	74	0.0352113	9.9e-03	2.1e-02	3.3e+00	3.86331	1.29423	5	0.0142223	0.0549451	17	2.9e-04	5.6e-03	5.3e+01	8.58441	0.582451	5	0.0675676
DNAm Beta-2-microglobulin	GO Biological Process	GO:0051094	positive regulation of developmental process	745	0.105634	1.0e-02	2.2e-02	3.3e+00	1.79204	10.0444	18	0.110378	0.197802	40	7.9e-04	7.6e-03	5.7e+01	2.55804	5.86387	15	0.0201342
DNAm Beta-2-microglobulin	GO Biological Process	GO:0050768	negative regulation of neurogenesis	95	0.0352113	1.0e-02	2.2e-02	3.4e+00	3.83794	1.30278	5	0.0143163	0.0549451	46	9.2e-04	7.9e-03	1.1e+02	6.6868	0.747741	5	0.0526316
DNAm Beta-2-microglobulin	GO Biological Process	GO:0045165	cell fate commitment	224	0.0492958	1.0e-02	2.2e-02	3.4e+00	2.49175	3.61192	9	0.0396914	0.0989011	85	2.0e-03	9.3e-03	8.0e+01	3.97029	1.7631	7	0.03125
DNAm Beta-2-microglobulin	GO Biological Process	GO:0016568	chromatin modification	455	0.056338	1.0e-02	2.2e-02	3.4e+00	2.34625	4.26212	10	0.0468365	0.10989	510	2.8e-02	3.9e-02	8.2e+01	2.23383	3.58129	8	0.0175824
DNAm Beta-2-microglobulin	GO Biological Process	GO:0010596	negative regulation of endothelial cell migration	30	0.0211268	1.0e-02	2.2e-02	3.4e+00	6.73781	0.445249	3	0.00489284	0.032967	71	1.7e-03	9.3e-03	6.8e+01	12.7049	0.236129	3	0.1
DNAm Beta-2-microglobulin	GO Biological Process	GO:0031018	endocrine pancreas development	49	0.028169	1.0e-02	2.2e-02	3.5e+00	4.74022	0.843843	4	0.009273	0.043956	26	5.9e-04	7.6e-03	7.6e+01	10.3714	0.385677	4	0.0816327
DNAm Beta-2-microglobulin	GO Biological Process	GO:0051707	response to other organism	599	0.0704225	1.1e-02	2.2e-02	3.5e+00	2.33101	4.28998	10	0.0471427	0.10989	406	2.0e-02	3.0e-02	5.0e+01	2.12102	4.71471	10	0.0166945
DNAm Beta-2-microglobulin	GO Biological Process	GO:0045668	negative regulation of osteoblast differentiation	33	0.0211268	1.1e-02	2.2e-02	3.6e+00	6.61618	0.453434	3	0.00498279	0.032967	97	2.2e-03	9.3e-03	1.2e+02	11.5499	0.259742	3	0.0909091
DNAm Beta-2-microglobulin	GO Biological Process	GO:0060707	trophoblast giant cell differentiation	11	0.0140845	1.1e-02	2.2e-02	3.6e+00	12.8239	0.155958	2	0.00171383	0.021978	127	3.2e-03	1.0e-02	1.2e+02	23.0999	0.0865806	2	0.181818
DNAm Beta-2-microglobulin	GO Biological Process	GO:0060976	coronary vasculature development	13	0.0140845	1.1e-02	2.2e-02	3.6e+00	12.7617	0.156718	2	0.00172218	0.021978	170	4.5e-03	1.1e-02	1.7e+02	19.5461	0.102322	2	0.153846
DNAm Beta-2-microglobulin	GO Biological Process	GO:0044403	symbiosis, encompassing mutualism through parasitism	673	0.056338	1.1e-02	2.2e-02	3.7e+00	2.31665	4.31657	10	0.0474349	0.10989	1482	1.6e-01	1.7e-01	6.6e+01	1.51024	5.29716	8	0.0118871
DNAm Beta-2-microglobulin	GO Biological Process	GO:0031100	organ regeneration	42	0.0140845	1.1e-02	2.2e-02	3.7e+00	6.5494	0.458057	3	0.0050336	0.032967	653	4.3e-02	5.5e-02	1.0e+02	6.04997	0.33058	2	0.0476191
DNAm Beta-2-microglobulin	GO Biological Process	GO:0050872	white fat cell differentiation	12	0.00704225	1.2e-02	2.3e-02	3.8e+00	12.4349	0.160838	2	0.00176745	0.021978	1057	9.0e-02	1.0e-01	8.3e+01	10.5874	0.0944515	1	0.0833333
DNAm Beta-2-microglobulin	GO Biological Process	GO:0043066	negative regulation of apoptotic process	657	0.0915493	1.2e-02	2.3e-02	3.9e+00	2.01876	6.43961	13	0.0707649	0.142857	89	2.1e-03	9.3e-03	2.9e+01	2.51391	5.17122	13	0.0197869
DNAm Beta-2-microglobulin	GO Biological Process	GO:0030852	regulation of granulocyte differentiation	15	0.00704225	1.2e-02	2.3e-02	3.9e+00	12.2461	0.163317	2	0.00179469	0.021978	1201	1.1e-01	1.2e-01	1.0e+02	8.46995	0.118064	1	0.0666667
DNAm Beta-2-microglobulin	GO Biological Process	GO:0048864	stem cell development	195	0.0352113	1.2e-02	2.3e-02	3.9e+00	2.60784	3.06767	8	0.0337107	0.0879121	402	1.9e-02	2.9e-02	1.3e+02	3.25767	1.53484	5	0.025641
DNAm Beta-2-microglobulin	GO Biological Process	GO:0042035	regulation of cytokine biosynthetic process	94	0.028169	1.2e-02	2.3e-02	4.0e+00	4.55238	0.878662	4	0.00965563	0.043956	199	6.5e-03	1.4e-02	1.1e+02	5.40635	0.73987	4	0.0425532
DNAm Beta-2-microglobulin	GO Biological Process	GO:0030856	regulation of epithelial cell differentiation	91	0.0352113	1.2e-02	2.3e-02	4.0e+00	3.67735	1.35967	5	0.0149415	0.0549451	37	7.6e-04	7.6e-03	7.9e+01	6.98073	0.716257	5	0.0549451
DNAm Beta-2-microglobulin	GO Biological Process	GO:0080134	regulation of response to stress	824	0.0985916	1.2e-02	2.4e-02	4.1e+00	1.94094	7.21298	14	0.0792636	0.153846	186	5.5e-03	1.3e-02	7.3e+01	2.15861	6.48567	14	0.0169903
DNAm Beta-2-microglobulin	GO Biological Process	GO:0051253	negative regulation of RNA metabolic process	918	0.112676	1.3e-02	2.4e-02	4.2e+00	1.74777	10.2989	18	0.113174	0.197802	106	2.4e-03	9.4e-03	7.9e+01	2.21437	7.22554	16	0.0174292
DNAm Beta-2-microglobulin	GO Biological Process	GO:2000772	regulation of cellular senescence	12	0.0140845	1.3e-02	2.4e-02	4.3e+00	11.6103	0.17226	2	0.00189297	0.021978	151	3.9e-03	1.0e-02	1.2e+02	21.1749	0.0944515	2	0.166667
DNAm Beta-2-microglobulin	GO Biological Process	GO:0060334	regulation of interferon-gamma-mediated signaling pathway	24	0.0140845	1.3e-02	2.4e-02	4.4e+00	11.5963	0.172469	2	0.00189526	0.021978	326	1.5e-02	2.5e-02	8.6e+01	10.5874	0.188903	2	0.0833333
DNAm Beta-2-microglobulin	GO Biological Process	GO:0043069	negative regulation of programmed cell death	664	0.0915493	1.3e-02	2.4e-02	4.4e+00	1.98877	6.53672	13	0.0718321	0.142857	104	2.3e-03	9.3e-03	5.5e+01	2.48741	5.22632	13	0.0195783
DNAm Beta-2-microglobulin	GO Biological Process	GO:0060330	regulation of response to interferon-gamma	25	0.0140845	1.3e-02	2.4e-02	4.4e+00	11.577	0.172756	2	0.00189842	0.021978	385	1.6e-02	2.6e-02	8.4e+01	10.1639	0.196774	2	0.08
DNAm Beta-2-microglobulin	GO Biological Process	GO:0046824	positive regulation of nucleocytoplasmic transport	85	0.0140845	1.3e-02	2.4e-02	4.4e+00	4.41855	0.905274	4	0.00994807	0.043956	1389	1.4e-01	1.5e-01	1.2e+02	2.9894	0.669032	2	0.0235294
DNAm Beta-2-microglobulin	GO Biological Process	GO:0002819	regulation of adaptive immune response	112	0.0140845	1.3e-02	2.4e-02	4.4e+00	4.41415	0.906177	4	0.00995799	0.043956	1724	2.2e-01	2.2e-01	9.3e+01	2.26874	0.881548	2	0.0178571
DNAm Beta-2-microglobulin	GO Biological Process	GO:0045088	regulation of innate immune response	239	0.0422535	1.3e-02	2.5e-02	4.5e+00	3.09093	1.94116	6	0.0213315	0.0659341	287	1.2e-02	2.1e-02	1.2e+02	3.18952	1.88116	6	0.0251046
DNAm Beta-2-microglobulin	GO Biological Process	GO:0001836	release of cytochrome c from mitochondria	24	0.0140845	1.4e-02	2.5e-02	4.5e+00	11.343	0.176321	2	0.00193759	0.021978	326	1.5e-02	2.5e-02	8.0e+01	10.5874	0.188903	2	0.0833333
DNAm Beta-2-microglobulin	GO Biological Process	GO:0071364	cellular response to epidermal growth factor stimulus	16	0.0140845	1.4e-02	2.5e-02	4.6e+00	11.2769	0.177354	2	0.00194894	0.021978	205	6.9e-03	1.5e-02	1.2e+02	15.8812	0.125935	2	0.125
DNAm Beta-2-microglobulin	GO Biological Process	GO:0009607	response to biotic stimulus	624	0.0704225	1.4e-02	2.5e-02	4.6e+00	2.23883	4.46661	10	0.0490837	0.10989	500	2.6e-02	3.7e-02	1.2e+02	2.03605	4.91148	10	0.0160256
DNAm Beta-2-microglobulin	GO Biological Process	GO:0048863	stem cell differentiation	247	0.0422535	1.4e-02	2.5e-02	4.6e+00	2.3651	3.80533	9	0.0418169	0.0989011	310	1.4e-02	2.4e-02	8.6e+01	3.08622	1.94413	6	0.0242915
DNAm Beta-2-microglobulin	GO Biological Process	GO:0003214	cardiac left ventricle morphogenesis	12	0.0140845	1.4e-02	2.5e-02	4.7e+00	11.1423	0.179496	2	0.00197248	0.021978	151	3.9e-03	1.0e-02	1.6e+02	21.1749	0.0944515	2	0.166667
DNAm Beta-2-microglobulin	GO Biological Process	GO:0071371	cellular response to gonadotropin stimulus	18	0.0140845	1.4e-02	2.5e-02	4.7e+00	11.0908	0.18033	2	0.00198164	0.021978	253	8.7e-03	1.7e-02	1.8e+02	14.1166	0.141677	2	0.111111
DNAm Beta-2-microglobulin	GO Biological Process	GO:0035886	vascular smooth muscle cell differentiation	12	0.0140845	1.4e-02	2.6e-02	4.8e+00	11.0332	0.181271	2	0.00199199	0.021978	151	3.9e-03	1.0e-02	1.2e+02	21.1749	0.0944515	2	0.166667
DNAm Beta-2-microglobulin	GO Biological Process	GO:0035050	embryonic heart tube development	70	0.028169	1.5e-02	2.6e-02	4.8e+00	4.28195	0.934154	4	0.0102654	0.043956	103	2.3e-03	9.3e-03	6.8e+01	7.25996	0.550967	4	0.0571429
DNAm Beta-2-microglobulin	GO Biological Process	GO:0003006	developmental process involved in reproduction	431	0.0704225	1.5e-02	2.6e-02	4.9e+00	2.11501	5.20091	11	0.0571529	0.120879	99	2.2e-03	9.3e-03	8.8e+01	2.94778	3.39238	10	0.0232019
DNAm Beta-2-microglobulin	GO Biological Process	GO:0042306	regulation of protein import into nucleus	140	0.0211268	1.5e-02	2.6e-02	4.9e+00	3.48687	1.43395	5	0.0157577	0.0549451	1148	9.9e-02	1.1e-01	1.1e+02	2.72248	1.10193	3	0.0214286
DNAm Beta-2-microglobulin	GO Biological Process	GO:0045934	negative regulation of nucleobase-containing compound metabolic process	1009	0.119718	1.5e-02	2.6e-02	4.9e+00	1.6879	11.2566	19	0.123699	0.208791	108	2.5e-03	9.6e-03	1.2e+02	2.14057	7.9418	17	0.0168484
DNAm Beta-2-microglobulin	GO Biological Process	GO:0045786	negative regulation of cell cycle	248	0.0492958	1.5e-02	2.6e-02	5.0e+00	2.71584	2.57747	7	0.0283238	0.0769231	140	3.5e-03	1.0e-02	8.0e+01	3.58607	1.952	7	0.0282258
DNAm Beta-2-microglobulin	GO Biological Process	GO:0010633	negative regulation of epithelial cell migration	34	0.0211268	1.5e-02	2.6e-02	5.0e+00	5.84984	0.512835	3	0.00563554	0.032967	107	2.4e-03	9.4e-03	1.1e+02	11.2102	0.267613	3	0.0882353
DNAm Beta-2-microglobulin	GO Biological Process	GO:0051240	positive regulation of multicellular organismal process	585	0.0704225	1.5e-02	2.6e-02	5.0e+00	1.95318	6.65581	13	0.0731408	0.142857	388	1.7e-02	2.7e-02	7.6e+01	2.17178	4.60451	10	0.017094
DNAm Beta-2-microglobulin	GO Biological Process	GO:0048820	hair follicle maturation	15	0.0140845	1.5e-02	2.6e-02	5.0e+00	10.7489	0.186065	2	0.00204468	0.021978	194	6.0e-03	1.4e-02	1.2e+02	16.9399	0.118064	2	0.133333
DNAm Beta-2-microglobulin	GO Biological Process	GO:0048585	negative regulation of response to stimulus	903	0.112676	1.5e-02	2.6e-02	5.1e+00	1.75124	9.7074	17	0.106675	0.186813	87	2.0e-03	9.3e-03	1.0e+02	2.25115	7.10748	16	0.0177187
DNAm Beta-2-microglobulin	GO Biological Process	GO:0048598	embryonic morphogenesis	508	0.0774648	1.6e-02	2.7e-02	5.2e+00	1.94099	6.69763	13	0.0736003	0.142857	105	2.3e-03	9.3e-03	1.3e+02	2.75107	3.99845	11	0.0216535
DNAm Beta-2-microglobulin	GO Biological Process	GO:1900180	regulation of protein localization to nucleus	144	0.0211268	1.6e-02	2.7e-02	5.3e+00	3.41449	1.46435	5	0.0160917	0.0549451	1181	1.0e-01	1.1e-01	1.0e+02	2.64686	1.13342	3	0.0208333
DNAm Beta-2-microglobulin	GO Biological Process	GO:0051172	negative regulation of nitrogen compound metabolic process	1023	0.119718	1.6e-02	2.7e-02	5.3e+00	1.67422	11.3486	19	0.124709	0.208791	119	2.8e-03	1.0e-02	1.2e+02	2.11128	8.05199	17	0.0166178
DNAm Beta-2-microglobulin	GO Biological Process	GO:0090342	regulation of cell aging	20	0.0140845	1.6e-02	2.7e-02	5.3e+00	10.4227	0.191888	2	0.00210866	0.021978	273	1.1e-02	2.0e-02	1.2e+02	12.7049	0.157419	2	0.1
DNAm Beta-2-microglobulin	GO Biological Process	GO:0090100	positive regulation of transmembrane receptor protein serine/threonine kinase signaling pathway	66	0.0140845	1.6e-02	2.7e-02	5.4e+00	4.15349	0.963046	4	0.0105829	0.043956	1105	9.5e-02	1.0e-01	8.0e+01	3.84998	0.519483	2	0.030303
DNAm Beta-2-microglobulin	GO Biological Process	GO:0019048	modulation by virus of host morphology or physiology	350	0.0352113	1.6e-02	2.7e-02	5.4e+00	2.67167	2.62008	7	0.0287921	0.0769231	1387	1.4e-01	1.5e-01	1.2e+02	1.81499	2.75484	5	0.0142857
DNAm Beta-2-microglobulin	GO Biological Process	GO:0001676	long-chain fatty acid metabolic process	83	0.0211268	1.7e-02	2.7e-02	5.5e+00	5.62438	0.533392	3	0.00586145	0.032967	511	2.8e-02	3.9e-02	1.6e+02	4.59214	0.65329	3	0.0361446
DNAm Beta-2-microglobulin	GO Biological Process	GO:0008285	negative regulation of cell proliferation	555	0.084507	1.7e-02	2.7e-02	5.6e+00	1.92508	6.75298	13	0.0742086	0.142857	68	1.5e-03	8.7e-03	1.1e+02	2.74701	4.36838	12	0.0216216
DNAm Beta-2-microglobulin	GO Biological Process	GO:0000381	regulation of alternative mRNA splicing, via spliceosome	24	0.0140845	1.7e-02	2.8e-02	5.7e+00	10.0853	0.198308	2	0.00217921	0.021978	326	1.5e-02	2.5e-02	1.7e+02	10.5874	0.188903	2	0.0833333
DNAm Beta-2-microglobulin	GO Biological Process	GO:0001824	blastocyst development	68	0.00704225	1.7e-02	2.8e-02	5.7e+00	5.54458	0.541069	3	0.00594581	0.032967	2222	4.2e-01	4.2e-01	1.6e+02	1.86837	0.535225	1	0.0147059
DNAm Beta-2-microglobulin	GO Biological Process	GO:0044003	modification by symbiont of host morphology or physiology	357	0.0352113	1.8e-02	2.8e-02	5.8e+00	2.62802	2.66361	7	0.0292704	0.0769231	1418	1.5e-01	1.6e-01	2.8e+01	1.7794	2.80993	5	0.0140056
DNAm Beta-2-microglobulin	GO Biological Process	GO:0016032	viral process	609	0.0492958	1.8e-02	2.8e-02	5.8e+00	2.2745	3.95691	9	0.0434825	0.0989011	1652	2.0e-01	2.1e-01	1.3e+02	1.46034	4.79342	7	0.0114942
DNAm Beta-2-microglobulin	GO Biological Process	GO:0009880	embryonic pattern specification	60	0.0211268	1.8e-02	2.8e-02	5.9e+00	4.03341	0.991716	4	0.010898	0.043956	290	1.2e-02	2.1e-02	1.3e+02	6.35246	0.472258	3	0.05
DNAm Beta-2-microglobulin	GO Biological Process	GO:0050680	negative regulation of epithelial cell proliferation	91	0.0352113	1.8e-02	2.8e-02	5.9e+00	3.32076	1.50568	5	0.0165459	0.0549451	37	7.6e-04	7.6e-03	1.4e+02	6.98073	0.716257	5	0.0549451
DNAm Beta-2-microglobulin	GO Biological Process	GO:0044764	multi-organism cellular process	611	0.0492958	1.8e-02	2.8e-02	5.9e+00	2.2684	3.96755	9	0.0435994	0.0989011	1670	2.1e-01	2.1e-01	9.6e+01	1.45556	4.80916	7	0.0114566
DNAm Beta-2-microglobulin	GO Biological Process	GO:0061035	regulation of cartilage development	50	0.0211268	1.8e-02	2.8e-02	5.9e+00	4.02817	0.993008	4	0.0109122	0.043956	209	7.1e-03	1.5e-02	1.3e+02	7.62296	0.393548	3	0.06
DNAm Beta-2-microglobulin	GO Biological Process	GO:0050793	regulation of developmental process	1592	0.169014	1.8e-02	2.8e-02	6.0e+00	1.48274	18.2095	27	0.200104	0.296703	66	1.5e-03	8.7e-03	1.1e+02	1.91532	12.5306	24	0.0150754
DNAm Beta-2-microglobulin	GO Biological Process	GO:0042177	negative regulation of protein catabolic process	46	0.0211268	1.8e-02	2.9e-02	6.1e+00	5.41389	0.55413	3	0.00608934	0.032967	188	5.7e-03	1.3e-02	2.4e+02	8.28582	0.362064	3	0.0652174
DNAm Beta-2-microglobulin	GO Biological Process	GO:0033554	cellular response to stress	1145	0.0985916	1.9e-02	2.9e-02	6.2e+00	1.75186	9.13314	16	0.100364	0.175824	860	6.7e-02	8.1e-02	3.4e+01	1.55344	9.01225	14	0.0122271
DNAm Beta-2-microglobulin	GO Biological Process	GO:0032862	activation of Rho GTPase activity	22	0.0140845	1.9e-02	2.9e-02	6.2e+00	9.58597	0.208638	2	0.00229273	0.021978	301	1.3e-02	2.2e-02	1.6e+02	11.5499	0.173161	2	0.0909091
DNAm Beta-2-microglobulin	GO Biological Process	GO:0003002	regionalization	300	0.056338	1.9e-02	2.9e-02	6.3e+00	2.24729	4.00481	9	0.044009	0.0989011	111	2.6e-03	9.8e-03	1.1e+02	3.38798	2.36129	8	0.0266667
DNAm Beta-2-microglobulin	GO Biological Process	GO:0034121	regulation of toll-like receptor signaling pathway	34	0.0140845	1.9e-02	2.9e-02	6.3e+00	9.52855	0.209896	2	0.00230654	0.021978	517	2.9e-02	4.1e-02	1.5e+02	7.47349	0.267613	2	0.0588235
DNAm Beta-2-microglobulin	GO Biological Process	GO:0048583	regulation of response to stimulus	2679	0.239437	1.9e-02	2.9e-02	6.4e+00	1.38571	24.5362	34	0.269628	0.373626	117	2.7e-03	9.9e-03	4.0e+01	1.61242	21.0863	34	0.0126913
DNAm Beta-2-microglobulin	GO Biological Process	GO:0006357	regulation of transcription from RNA polymerase II promoter	1370	0.140845	2.0e-02	2.9e-02	6.5e+00	1.54417	14.8947	23	0.163678	0.252747	184	5.3e-03	1.3e-02	1.0e+02	1.85473	10.7832	20	0.0145985
DNAm Beta-2-microglobulin	GO Biological Process	GO:0007440	foregut morphogenesis	12	0.0140845	2.0e-02	2.9e-02	6.5e+00	9.37469	0.21334	2	0.0023444	0.021978	151	3.9e-03	1.0e-02	1.8e+02	21.1749	0.0944515	2	0.166667
DNAm Beta-2-microglobulin	GO Biological Process	GO:0030308	negative regulation of cell growth	145	0.0352113	2.0e-02	2.9e-02	6.5e+00	3.23841	1.54397	5	0.0169667	0.0549451	191	5.8e-03	1.3e-02	6.9e+01	4.38101	1.14129	5	0.0344828
DNAm Beta-2-microglobulin	GO Biological Process	GO:0035270	endocrine system development	128	0.0422535	2.0e-02	2.9e-02	6.5e+00	2.83536	2.11613	6	0.0232542	0.0659341	24	5.3e-04	7.6e-03	1.8e+02	5.95544	1.00748	6	0.046875
DNAm Beta-2-microglobulin	GO Biological Process	GO:0070887	cellular response to chemical stimulus	1864	0.15493	2.0e-02	2.9e-02	6.6e+00	1.5045	16.6168	25	0.182602	0.274725	584	3.5e-02	4.6e-02	2.3e+02	1.49951	14.6715	22	0.0118026
DNAm Beta-2-microglobulin	GO Biological Process	GO:0071634	regulation of transforming growth factor beta production	17	0.0140845	2.1e-02	3.0e-02	6.8e+00	9.14101	0.218794	2	0.00240433	0.021978	218	7.7e-03	1.6e-02	1.2e+02	14.947	0.133806	2	0.117647
DNAm Beta-2-microglobulin	GO Biological Process	GO:0001961	positive regulation of cytokine-mediated signaling pathway	23	0.0140845	2.1e-02	3.0e-02	6.8e+00	9.12708	0.219128	2	0.002408	0.021978	313	1.4e-02	2.4e-02	1.8e+02	11.0478	0.181032	2	0.0869565
DNAm Beta-2-microglobulin	GO Biological Process	GO:0030433	ER-associated ubiquitin-dependent protein catabolic process	36	0.0140845	2.1e-02	3.0e-02	6.8e+00	9.11297	0.219467	2	0.00241173	0.021978	567	3.3e-02	4.4e-02	1.6e+02	7.05829	0.283355	2	0.0555556
DNAm Beta-2-microglobulin	GO Biological Process	GO:0070849	response to epidermal growth factor stimulus	21	0.0140845	2.1e-02	3.0e-02	6.9e+00	9.10614	0.219632	2	0.00241354	0.021978	288	1.2e-02	2.1e-02	1.7e+02	12.0999	0.16529	2	0.0952381
DNAm Beta-2-microglobulin	GO Biological Process	GO:0051302	regulation of cell division	94	0.0140845	2.1e-02	3.0e-02	6.9e+00	3.85173	1.03849	4	0.011412	0.043956	1513	1.7e-01	1.8e-01	7.6e+01	2.70318	0.73987	2	0.0212766
DNAm Beta-2-microglobulin	GO Biological Process	GO:0035051	cardiocyte differentiation	98	0.0211268	2.1e-02	3.0e-02	6.9e+00	3.19086	1.56698	5	0.0172195	0.0549451	649	4.2e-02	5.4e-02	1.8e+02	3.88926	0.771354	3	0.0306122
DNAm Beta-2-microglobulin	GO Biological Process	GO:0060760	positive regulation of response to cytokine stimulus	24	0.0140845	2.1e-02	3.0e-02	6.9e+00	9.07296	0.220435	2	0.00242237	0.021978	326	1.5e-02	2.5e-02	1.4e+02	10.5874	0.188903	2	0.0833333
DNAm Beta-2-microglobulin	GO Biological Process	GO:0045892	negative regulation of transcription, DNA-dependent	880	0.105634	2.1e-02	3.0e-02	6.9e+00	1.69147	10.0504	17	0.110444	0.186813	160	4.0e-03	1.1e-02	1.2e+02	2.16561	6.92645	15	0.0170455
DNAm Beta-2-microglobulin	GO Biological Process	GO:0034097	response to cytokine stimulus	525	0.0492958	2.1e-02	3.0e-02	6.9e+00	2.20695	4.07803	9	0.0448136	0.0989011	1274	1.2e-01	1.3e-01	1.1e+02	1.69399	4.13225	7	0.0133333
DNAm Beta-2-microglobulin	GO Biological Process	GO:0019438	aromatic compound biosynthetic process	2807	0.204225	2.1e-02	3.0e-02	7.0e+00	1.39976	22.8611	32	0.251221	0.351648	910	7.2e-02	8.6e-02	1.3e+02	1.31259	22.0938	29	0.0103313
DNAm Beta-2-microglobulin	GO Biological Process	GO:0035116	embryonic hindlimb morphogenesis	30	0.0140845	2.1e-02	3.0e-02	7.0e+00	5.13443	0.584291	3	0.00642078	0.032967	437	2.3e-02	3.3e-02	2.0e+02	8.46995	0.236129	2	0.0666667
DNAm Beta-2-microglobulin	GO Biological Process	GO:0065008	regulation of biological quality	2826	0.239437	2.1e-02	3.0e-02	7.0e+00	1.37713	24.6891	34	0.271308	0.373626	198	6.4e-03	1.4e-02	1.1e+02	1.52855	22.2433	34	0.0120311
DNAm Beta-2-microglobulin	GO Biological Process	GO:0010629	negative regulation of gene expression	980	0.112676	2.2e-02	3.0e-02	7.1e+00	1.65334	10.8871	18	0.119638	0.197802	169	4.5e-03	1.1e-02	2.0e+02	2.07427	7.71354	16	0.0163265
DNAm Beta-2-microglobulin	GO Biological Process	GO:0032731	positive regulation of interleukin-1 beta production	23	0.0140845	2.2e-02	3.0e-02	7.3e+00	8.81173	0.22697	2	0.00249418	0.021978	313	1.4e-02	2.4e-02	1.2e+02	11.0478	0.181032	2	0.0869565
DNAm Beta-2-microglobulin	GO Biological Process	GO:0007368	determination of left/right symmetry	88	0.028169	2.2e-02	3.0e-02	7.3e+00	3.77536	1.0595	4	0.0116429	0.043956	180	5.1e-03	1.2e-02	1.1e+02	5.77497	0.692644	4	0.0454546
DNAm Beta-2-microglobulin	GO Biological Process	GO:0060548	negative regulation of cell death	693	0.0915493	2.2e-02	3.0e-02	7.3e+00	1.85543	7.00644	13	0.0769939	0.142857	131	3.3e-03	1.0e-02	2.0e+02	2.38332	5.45458	13	0.018759
DNAm Beta-2-microglobulin	GO Biological Process	GO:0002720	positive regulation of cytokine production involved in immune response	21	0.0140845	2.2e-02	3.1e-02	7.4e+00	8.75383	0.228471	2	0.00251067	0.021978	288	1.2e-02	2.1e-02	1.7e+02	12.0999	0.16529	2	0.0952381
DNAm Beta-2-microglobulin	GO Biological Process	GO:0090068	positive regulation of cell cycle process	184	0.0352113	2.2e-02	3.1e-02	7.4e+00	3.13189	1.59648	5	0.0175437	0.0549451	337	1.5e-02	2.5e-02	1.4e+02	3.45243	1.44826	5	0.0271739
DNAm Beta-2-microglobulin	GO Biological Process	GO:0048593	camera-type eye morphogenesis	96	0.0352113	2.3e-02	3.1e-02	7.6e+00	3.1046	1.61051	5	0.017698	0.0549451	48	9.7e-04	7.9e-03	1.1e+02	6.61715	0.755612	5	0.0520833
DNAm Beta-2-microglobulin	GO Biological Process	GO:0032459	regulation of protein oligomerization	24	0.0140845	2.3e-02	3.2e-02	7.7e+00	8.54757	0.233985	2	0.00257126	0.021978	326	1.5e-02	2.5e-02	1.1e+02	10.5874	0.188903	2	0.0833333
DNAm Beta-2-microglobulin	GO Biological Process	GO:0044267	cellular protein metabolic process	2935	0.211268	2.4e-02	3.2e-02	7.8e+00	1.38803	23.0542	32	0.253343	0.351648	918	7.5e-02	8.9e-02	2.0e+02	1.29863	23.1013	30	0.0102215
DNAm Beta-2-microglobulin	GO Biological Process	GO:0030216	keratinocyte differentiation	90	0.0211268	2.4e-02	3.2e-02	7.9e+00	4.89682	0.612643	3	0.00673234	0.032967	579	3.4e-02	4.6e-02	1.1e+02	4.23498	0.708387	3	0.0333333
DNAm Beta-2-microglobulin	GO Biological Process	GO:0031128	developmental induction	34	0.00704225	2.4e-02	3.2e-02	7.9e+00	4.88873	0.613656	3	0.00674348	0.032967	1776	2.4e-01	2.4e-01	2.1e+02	3.73674	0.267613	1	0.0294118
DNAm Beta-2-microglobulin	GO Biological Process	GO:0060706	cell differentiation involved in embryonic placenta development	20	0.0140845	2.4e-02	3.2e-02	8.0e+00	8.39687	0.238184	2	0.00261741	0.021978	273	1.1e-02	2.0e-02	1.3e+02	12.7049	0.157419	2	0.1
DNAm Beta-2-microglobulin	GO Biological Process	GO:0006325	chromatin organization	577	0.056338	2.4e-02	3.2e-02	8.0e+00	2.04854	4.88152	10	0.0536431	0.10989	1043	8.6e-02	9.7e-02	1.9e+02	1.76151	4.54154	8	0.0138648
DNAm Beta-2-microglobulin	GO Biological Process	GO:0072148	epithelial cell fate commitment	15	0.0140845	2.4e-02	3.2e-02	8.0e+00	8.37443	0.238822	2	0.00262442	0.021978	194	6.0e-03	1.4e-02	1.6e+02	16.9399	0.118064	2	0.133333
DNAm Beta-2-microglobulin	GO Biological Process	GO:0051701	interaction with host	394	0.0352113	2.4e-02	3.2e-02	8.1e+00	2.45407	2.8524	7	0.0313451	0.0769231	1645	2.0e-01	2.1e-01	1.2e+02	1.6123	3.10116	5	0.0126904
DNAm Beta-2-microglobulin	GO Biological Process	GO:0030858	positive regulation of epithelial cell differentiation	38	0.0211268	2.5e-02	3.3e-02	8.2e+00	4.82413	0.621874	3	0.00683378	0.032967	132	3.3e-03	1.0e-02	1.4e+02	10.0302	0.299096	3	0.0789474
DNAm Beta-2-microglobulin	GO Biological Process	GO:0030512	negative regulation of transforming growth factor beta receptor signaling pathway	66	0.0140845	2.5e-02	3.3e-02	8.3e+00	4.81611	0.622909	3	0.00684515	0.032967	1105	9.5e-02	1.0e-01	1.4e+02	3.84998	0.519483	2	0.030303
DNAm Beta-2-microglobulin	GO Biological Process	GO:0043484	regulation of RNA splicing	67	0.0211268	2.5e-02	3.3e-02	8.3e+00	4.80863	0.623879	3	0.00685581	0.032967	380	1.6e-02	2.5e-02	9.3e+01	5.68877	0.527354	3	0.0447761
DNAm Beta-2-microglobulin	GO Biological Process	GO:0034654	nucleobase-containing compound biosynthetic process	2732	0.197183	2.5e-02	3.3e-02	8.4e+00	1.3916	22.2765	31	0.244797	0.340659	987	8.3e-02	9.5e-02	1.8e+02	1.30212	21.5035	28	0.0102489
DNAm Beta-2-microglobulin	GO Biological Process	GO:0045168	cell-cell signaling involved in cell fate commitment	35	0.00704225	2.6e-02	3.4e-02	8.8e+00	4.70492	0.637631	3	0.00700693	0.032967	1797	2.4e-01	2.4e-01	1.8e+02	3.62998	0.275484	1	0.0285714
DNAm Beta-2-microglobulin	GO Biological Process	GO:0042127	regulation of cell proliferation	1247	0.140845	2.7e-02	3.4e-02	8.8e+00	1.54086	13.6287	21	0.149766	0.230769	79	1.8e-03	9.3e-03	9.8e+01	2.03768	9.81509	20	0.0160385
DNAm Beta-2-microglobulin	GO Biological Process	GO:0003323	type B pancreatic cell development	11	0.0140845	2.7e-02	3.5e-02	9.0e+00	7.87137	0.254085	2	0.00279215	0.021978	127	3.2e-03	1.0e-02	7.0e+01	23.0999	0.0865806	2	0.181818
DNAm Beta-2-microglobulin	GO Biological Process	GO:0009855	determination of bilateral symmetry	94	0.028169	2.8e-02	3.6e-02	9.4e+00	3.48943	1.14632	4	0.0125969	0.043956	199	6.5e-03	1.4e-02	1.1e+02	5.40635	0.73987	4	0.0425532
DNAm Beta-2-microglobulin	GO Biological Process	GO:0072358	cardiovascular system development	723	0.105634	2.9e-02	3.6e-02	9.5e+00	1.66355	9.61801	16	0.105692	0.175824	25	5.8e-04	7.6e-03	2.2e+02	2.63588	5.69071	15	0.0207469
DNAm Beta-2-microglobulin	GO Biological Process	GO:0006968	cellular defense response	58	0.0140845	2.9e-02	3.6e-02	9.5e+00	7.64094	0.261748	2	0.00287635	0.021978	957	7.6e-02	8.9e-02	1.5e+02	4.38101	0.456516	2	0.0344828
DNAm Beta-2-microglobulin	GO Biological Process	GO:0045765	regulation of angiogenesis	164	0.0352113	2.9e-02	3.7e-02	9.7e+00	2.9082	1.71928	5	0.0188931	0.0549451	267	9.6e-03	1.9e-02	1.2e+02	3.87345	1.29084	5	0.0304878
DNAm Beta-2-microglobulin	GO Biological Process	GO:0010564	regulation of cell cycle process	398	0.056338	2.9e-02	3.7e-02	9.8e+00	2.19866	3.63858	8	0.0399844	0.0879121	311	1.4e-02	2.4e-02	2.1e+02	2.55376	3.13264	8	0.0201005
DNAm Beta-2-microglobulin	GO Biological Process	GO:0090316	positive regulation of intracellular protein transport	112	0.0140845	3.0e-02	3.7e-02	9.8e+00	3.43727	1.16372	4	0.0127881	0.043956	1724	2.2e-01	2.2e-01	1.7e+02	2.26874	0.881548	2	0.0178571
DNAm Beta-2-microglobulin	GO Biological Process	GO:0048708	astrocyte differentiation	23	0.0140845	3.1e-02	3.8e-02	1.0e+01	7.32517	0.273031	2	0.00300034	0.021978	313	1.4e-02	2.4e-02	2.5e+02	11.0478	0.181032	2	0.0869565
DNAm Beta-2-microglobulin	GO Biological Process	GO:0006464	cellular protein modification process	2190	0.176056	3.1e-02	3.8e-02	1.0e+01	1.41813	19.0391	27	0.209221	0.296703	587	3.5e-02	4.7e-02	2.5e+02	1.45033	17.2374	25	0.0114155
DNAm Beta-2-microglobulin	GO Biological Process	GO:0007212	dopamine receptor signaling pathway	25	0.0211268	3.1e-02	3.8e-02	1.0e+01	7.32291	0.273116	2	0.00300127	0.021978	47	9.7e-04	7.9e-03	1.6e+02	15.2459	0.196774	3	0.12
DNAm Beta-2-microglobulin	GO Biological Process	GO:0032732	positive regulation of interleukin-1 production	26	0.0140845	3.1e-02	3.9e-02	1.0e+01	7.26487	0.275297	2	0.00302525	0.021978	389	1.8e-02	2.7e-02	3.6e+01	9.77302	0.204645	2	0.0769231
DNAm Beta-2-microglobulin	GO Biological Process	GO:0016525	negative regulation of angiogenesis	59	0.0211268	3.1e-02	3.9e-02	1.0e+01	4.39903	0.681968	3	0.00749416	0.032967	280	1.1e-02	2.1e-02	2.1e+02	6.46013	0.464387	3	0.0508475
DNAm Beta-2-microglobulin	GO Biological Process	GO:0009799	specification of symmetry	95	0.028169	3.2e-02	3.9e-02	1.0e+01	3.37393	1.18556	4	0.0130281	0.043956	203	6.7e-03	1.5e-02	1.3e+02	5.34944	0.747741	4	0.0421053
DNAm Beta-2-microglobulin	GO Biological Process	GO:0032677	regulation of interleukin-8 production	43	0.0140845	3.2e-02	3.9e-02	1.1e+01	7.20821	0.277461	2	0.00304903	0.021978	663	4.5e-02	5.7e-02	2.1e+02	5.90927	0.338451	2	0.0465116
DNAm Beta-2-microglobulin	GO Biological Process	GO:0050873	brown fat cell differentiation	30	0.00704225	3.2e-02	3.9e-02	1.1e+01	7.20814	0.277464	2	0.00304906	0.021978	1679	2.1e-01	2.2e-01	2.2e+02	4.23498	0.236129	1	0.0333333
DNAm Beta-2-microglobulin	GO Biological Process	GO:0050434	positive regulation of viral transcription	54	0.0140845	3.2e-02	3.9e-02	1.1e+01	7.20336	0.277648	2	0.00305108	0.021978	862	6.8e-02	8.1e-02	1.1e+02	4.70553	0.425032	2	0.037037
DNAm Beta-2-microglobulin	GO Biological Process	GO:0060397	JAK-STAT cascade involved in growth hormone signaling pathway	25	0.0140845	3.2e-02	3.9e-02	1.1e+01	7.19451	0.27799	2	0.00305483	0.021978	385	1.6e-02	2.6e-02	1.9e+02	10.1639	0.196774	2	0.08
DNAm Beta-2-microglobulin	GO Biological Process	GO:1901362	organic cyclic compound biosynthetic process	2924	0.211268	3.2e-02	3.9e-02	1.1e+01	1.35605	23.598	32	0.259318	0.351648	914	7.3e-02	8.6e-02	1.2e+02	1.30351	23.0147	30	0.0102599
DNAm Beta-2-microglobulin	GO Biological Process	GO:0008380	RNA splicing	331	0.0492958	3.2e-02	3.9e-02	1.1e+01	2.5242	2.37699	6	0.0261207	0.0659341	384	1.6e-02	2.5e-02	1.2e+02	2.68684	2.60529	7	0.021148
DNAm Beta-2-microglobulin	GO Biological Process	GO:0043124	negative regulation of I-kappaB kinase/NF-kappaB cascade	32	0.0140845	3.3e-02	3.9e-02	1.1e+01	7.10001	0.28169	2	0.00309549	0.021978	501	2.6e-02	3.7e-02	1.4e+02	7.94058	0.251871	2	0.0625
DNAm Beta-2-microglobulin	GO Biological Process	GO:0010769	regulation of cell morphogenesis involved in differentiation	201	0.0492958	3.3e-02	3.9e-02	1.1e+01	2.30618	3.03532	7	0.0333552	0.0769231	53	1.1e-03	8.1e-03	1.0e+02	4.4246	1.58206	7	0.0348259
DNAm Beta-2-microglobulin	GO Biological Process	GO:0018130	heterocycle biosynthetic process	2806	0.197183	3.3e-02	3.9e-02	1.1e+01	1.36392	22.7286	31	0.249765	0.340659	1183	1.1e-01	1.2e-01	1.9e+02	1.26778	22.0859	28	0.00997862
DNAm Beta-2-microglobulin	GO Biological Process	GO:0032101	regulation of response to external stimulus	439	0.0633803	3.3e-02	3.9e-02	1.1e+01	2.03485	4.42292	9	0.0486036	0.0989011	250	8.0e-03	1.6e-02	2.4e+02	2.60466	3.45535	9	0.0205011
DNAm Beta-2-microglobulin	GO Biological Process	GO:0043586	tongue development	16	0.00704225	3.4e-02	3.9e-02	1.1e+01	7.00662	0.285444	2	0.00313675	0.021978	1242	1.2e-01	1.3e-01	1.9e+02	7.94058	0.125935	1	0.0625
DNAm Beta-2-microglobulin	GO Biological Process	GO:0032102	negative regulation of response to external stimulus	137	0.0352113	3.4e-02	3.9e-02	1.1e+01	2.79934	1.78614	5	0.0196279	0.0549451	173	4.6e-03	1.1e-02	1.8e+02	4.63684	1.07832	5	0.0364963
DNAm Beta-2-microglobulin	GO Biological Process	GO:0002702	positive regulation of production of molecular mediator of immune response	27	0.0140845	3.4e-02	3.9e-02	1.1e+01	6.9672	0.287059	2	0.0031545	0.021978	399	1.9e-02	2.9e-02	1.8e+02	9.41106	0.212516	2	0.0740741
DNAm Beta-2-microglobulin	GO Biological Process	GO:0050792	regulation of viral process	118	0.0211268	3.4e-02	3.9e-02	1.1e+01	4.26745	0.702996	3	0.00772523	0.032967	858	6.6e-02	8.0e-02	1.3e+02	3.23007	0.928773	3	0.0254237
DNAm Beta-2-microglobulin	GO Biological Process	GO:0009790	embryo development	946	0.119718	3.4e-02	4.0e-02	1.1e+01	1.56935	11.4697	18	0.126041	0.197802	59	1.2e-03	8.3e-03	2.3e+02	2.28313	7.44593	17	0.0179704
DNAm Beta-2-microglobulin	GO Biological Process	GO:0071456	cellular response to hypoxia	86	0.0211268	3.4e-02	4.0e-02	1.1e+01	4.24838	0.706151	3	0.00775991	0.032967	522	3.0e-02	4.2e-02	1.6e+02	4.43195	0.676903	3	0.0348837
DNAm Beta-2-microglobulin	GO Biological Process	GO:0070201	regulation of establishment of protein localization	380	0.0422535	3.5e-02	4.0e-02	1.2e+01	2.12793	3.75953	8	0.0413135	0.0879121	972	8.0e-02	9.3e-02	2.4e+02	2.00604	2.99097	6	0.0157895
DNAm Beta-2-microglobulin	GO Biological Process	GO:0030278	regulation of ossification	160	0.0352113	3.5e-02	4.1e-02	1.2e+01	2.47072	2.42844	6	0.0266861	0.0659341	256	8.7e-03	1.7e-02	2.0e+02	3.97029	1.25935	5	0.03125
DNAm Beta-2-microglobulin	GO Biological Process	GO:0046822	regulation of nucleocytoplasmic transport	177	0.0211268	3.6e-02	4.1e-02	1.2e+01	2.76042	1.81132	5	0.0199046	0.0549451	1485	1.6e-01	1.7e-01	2.4e+02	2.15338	1.39316	3	0.0169491
DNAm Beta-2-microglobulin	GO Biological Process	GO:0036294	cellular response to decreased oxygen levels	87	0.0211268	3.6e-02	4.1e-02	1.2e+01	4.16971	0.719475	3	0.00790632	0.032967	564	3.1e-02	4.3e-02	1.6e+02	4.38101	0.684774	3	0.0344828
DNAm Beta-2-microglobulin	GO Biological Process	GO:0060674	placenta blood vessel development	28	0.0140845	3.6e-02	4.1e-02	1.2e+01	6.70632	0.298226	2	0.00327721	0.021978	407	2.0e-02	3.0e-02	2.2e+02	9.07495	0.220387	2	0.0714286
DNAm Beta-2-microglobulin	GO Biological Process	GO:0043967	histone H4 acetylation	43	0.0140845	3.7e-02	4.1e-02	1.2e+01	6.67189	0.299765	2	0.00329412	0.021978	663	4.5e-02	5.7e-02	1.9e+02	5.90927	0.338451	2	0.0465116
DNAm Beta-2-microglobulin	GO Biological Process	GO:0034698	response to gonadotropin stimulus	26	0.0140845	3.7e-02	4.1e-02	1.2e+01	6.6484	0.300824	2	0.00330576	0.021978	389	1.8e-02	2.7e-02	1.5e+02	9.77302	0.204645	2	0.0769231
DNAm Beta-2-microglobulin	GO Biological Process	GO:0006376	mRNA splice site selection	24	0.0140845	3.7e-02	4.1e-02	1.2e+01	6.64718	0.30088	2	0.00330637	0.021978	326	1.5e-02	2.5e-02	1.8e+02	10.5874	0.188903	2	0.0833333
DNAm Beta-2-microglobulin	GO Biological Process	GO:0051222	positive regulation of protein transport	195	0.0211268	3.7e-02	4.1e-02	1.2e+01	2.73357	1.82911	5	0.0201001	0.0549451	1641	2.0e-01	2.1e-01	1.5e+02	1.9546	1.53484	3	0.0153846
DNAm Beta-2-microglobulin	GO Biological Process	GO:0051223	regulation of protein transport	329	0.0352113	3.7e-02	4.1e-02	1.2e+01	2.24376	3.11977	7	0.0342831	0.0769231	1241	1.2e-01	1.3e-01	1.5e+02	1.93084	2.58955	5	0.0151976
DNAm Beta-2-microglobulin	GO Biological Process	GO:0019369	arachidonic acid metabolic process	53	0.0140845	3.7e-02	4.2e-02	1.2e+01	6.60189	0.302943	2	0.00332905	0.021978	854	6.5e-02	7.9e-02	1.7e+02	4.79431	0.417161	2	0.0377359
DNAm Beta-2-microglobulin	GO Biological Process	GO:0042340	keratan sulfate catabolic process	12	0.00704225	3.8e-02	4.2e-02	1.3e+01	25.9802	0.0384909	1	0.000422976	0.010989	1057	9.0e-02	1.0e-01	1.5e+02	10.5874	0.0944515	1	0.0833333
DNAm Beta-2-microglobulin	GO Biological Process	GO:0040020	regulation of meiosis	26	0.0140845	3.9e-02	4.3e-02	1.3e+01	6.48685	0.308316	2	0.00338809	0.021978	389	1.8e-02	2.7e-02	7.0e+01	9.77302	0.204645	2	0.0769231
DNAm Beta-2-microglobulin	GO Biological Process	GO:0006368	transcription elongation from RNA polymerase II promoter	66	0.0140845	3.9e-02	4.3e-02	1.3e+01	6.45435	0.309869	2	0.00340515	0.021978	1105	9.5e-02	1.0e-01	2.3e+02	3.84998	0.519483	2	0.030303
DNAm Beta-2-microglobulin	GO Biological Process	GO:0044271	cellular nitrogen compound biosynthetic process	2858	0.197183	3.9e-02	4.3e-02	1.3e+01	1.34553	23.0393	31	0.253179	0.340659	1287	1.3e-01	1.3e-01	1.5e+02	1.24471	22.4952	28	0.00979706
DNAm Beta-2-microglobulin	GO Biological Process	GO:0035137	hindlimb morphogenesis	39	0.0140845	4.0e-02	4.4e-02	1.3e+01	3.98764	0.752324	3	0.0082673	0.032967	592	3.8e-02	4.9e-02	1.8e+02	6.51535	0.306968	2	0.0512821
DNAm Beta-2-microglobulin	GO Biological Process	GO:0048565	digestive tract development	116	0.0352113	4.1e-02	4.4e-02	1.3e+01	2.66213	1.8782	5	0.0206395	0.0549451	102	2.2e-03	9.3e-03	2.6e+02	5.47626	0.913031	5	0.0431035
DNAm Beta-2-microglobulin	GO Biological Process	GO:2000113	negative regulation of cellular macromolecule biosynthetic process	988	0.105634	4.1e-02	4.4e-02	1.4e+01	1.56209	10.8828	17	0.119592	0.186813	278	1.1e-02	2.1e-02	1.6e+02	1.92889	7.77651	15	0.0151822
DNAm Beta-2-microglobulin	GO Biological Process	GO:0048024	regulation of mRNA splicing, via spliceosome	41	0.0140845	4.1e-02	4.5e-02	1.4e+01	6.2446	0.320277	2	0.00351953	0.021978	644	4.1e-02	5.3e-02	2.1e+02	6.19753	0.322709	2	0.0487805
DNAm Beta-2-microglobulin	GO Biological Process	GO:1902105	regulation of leukocyte differentiation	191	0.028169	4.1e-02	4.5e-02	1.4e+01	2.6494	1.88722	5	0.0207387	0.0549451	851	6.4e-02	7.9e-02	2.0e+02	2.66072	1.50335	4	0.0209424
DNAm Beta-2-microglobulin	GO Biological Process	GO:0010594	regulation of endothelial cell migration	80	0.028169	4.2e-02	4.5e-02	1.4e+01	3.08535	1.29645	4	0.0142467	0.043956	143	3.7e-03	1.0e-02	2.7e+02	6.35246	0.629677	4	0.05
DNAm Beta-2-microglobulin	GO Biological Process	GO:0021915	neural tube development	139	0.0352113	4.2e-02	4.5e-02	1.4e+01	2.64454	1.89069	5	0.0207768	0.0549451	177	4.9e-03	1.2e-02	2.9e+02	4.57012	1.09406	5	0.0359712
DNAm Beta-2-microglobulin	GO Biological Process	GO:0001889	liver development	88	0.028169	4.2e-02	4.5e-02	1.4e+01	3.07859	1.29929	4	0.0142779	0.043956	180	5.1e-03	1.2e-02	2.5e+02	5.77497	0.692644	4	0.0454546
DNAm Beta-2-microglobulin	GO Biological Process	GO:0030517	negative regulation of axon extension	19	0.0140845	4.2e-02	4.5e-02	1.4e+01	6.18484	0.323371	2	0.00355353	0.021978	263	9.6e-03	1.9e-02	2.5e+02	13.3736	0.149548	2	0.105263
DNAm Beta-2-microglobulin	GO Biological Process	GO:0002460	adaptive immune response based on somatic recombination of immune receptors built from immunoglobulin superfamily domains	111	0.0211268	4.2e-02	4.5e-02	1.4e+01	3.91333	0.766611	3	0.00842429	0.032967	787	5.7e-02	7.1e-02	1.8e+02	3.43377	0.873677	3	0.027027
DNAm Beta-2-microglobulin	GO Biological Process	GO:0035924	cellular response to vascular endothelial growth factor stimulus	24	0.0140845	4.2e-02	4.5e-02	1.4e+01	6.1557	0.324902	2	0.00357035	0.021978	326	1.5e-02	2.5e-02	2.2e+02	10.5874	0.188903	2	0.0833333
DNAm Beta-2-microglobulin	GO Biological Process	GO:0001959	regulation of cytokine-mediated signaling pathway	88	0.0211268	4.2e-02	4.5e-02	1.4e+01	3.89924	0.76938	3	0.00845473	0.032967	566	3.2e-02	4.4e-02	2.6e+02	4.33123	0.692644	3	0.0340909
DNAm Beta-2-microglobulin	GO Biological Process	GO:0002252	immune effector process	388	0.0422535	4.3e-02	4.5e-02	1.4e+01	2.35876	2.54371	6	0.0279529	0.0659341	1045	8.6e-02	9.8e-02	1.9e+02	1.96468	3.05393	6	0.0154639
DNAm Beta-2-microglobulin	GO Biological Process	GO:0031327	negative regulation of cellular biosynthetic process	1076	0.112676	4.3e-02	4.5e-02	1.4e+01	1.52845	11.7767	18	0.129414	0.197802	272	1.1e-02	2.0e-02	1.4e+02	1.88921	8.46915	16	0.0148699
DNAm Beta-2-microglobulin	GO Biological Process	GO:0042110	T cell activation	181	0.0352113	4.4e-02	4.6e-02	1.5e+01	2.60473	1.91958	5	0.0210943	0.0549451	319	1.4e-02	2.4e-02	2.6e+02	3.50965	1.42464	5	0.0276243
DNAm Beta-2-microglobulin	GO Biological Process	GO:0032330	regulation of chondrocyte differentiation	36	0.0140845	4.4e-02	4.6e-02	1.5e+01	3.83909	0.781436	3	0.00858721	0.032967	567	3.3e-02	4.4e-02	2.0e+02	7.05829	0.283355	2	0.0555556
DNAm Beta-2-microglobulin	GO Biological Process	GO:0043412	macromolecule modification	2313	0.176056	4.4e-02	4.6e-02	1.5e+01	1.3736	19.6564	27	0.216005	0.296703	797	6.1e-02	7.5e-02	2.1e+02	1.37321	18.2055	25	0.0108085
DNAm Beta-2-microglobulin	GO Biological Process	GO:0000398	mRNA splicing, via spliceosome	203	0.028169	4.4e-02	4.6e-02	1.5e+01	3.01893	1.32497	4	0.0145601	0.043956	961	7.7e-02	8.9e-02	1.1e+02	2.50343	1.5978	4	0.0197044
DNAm Beta-2-microglobulin	GO Biological Process	GO:0070228	regulation of lymphocyte apoptotic process	35	0.0140845	4.5e-02	4.6e-02	1.5e+01	5.97127	0.334937	2	0.00368063	0.021978	523	3.1e-02	4.3e-02	2.4e+02	7.25996	0.275484	2	0.0571429
DNAm Beta-2-microglobulin	GO Biological Process	GO:0070613	regulation of protein processing	51	0.0140845	4.5e-02	4.7e-02	1.5e+01	5.94035	0.33668	2	0.00369979	0.021978	798	6.1e-02	7.5e-02	2.8e+02	4.98233	0.401419	2	0.0392157
DNAm Beta-2-microglobulin	GO Biological Process	GO:0061008	hepaticobiliary system development	90	0.028169	4.5e-02	4.7e-02	1.5e+01	2.99674	1.33478	4	0.014668	0.043956	187	5.6e-03	1.3e-02	2.2e+02	5.64663	0.708387	4	0.0444444
DNAm Beta-2-microglobulin	GO Biological Process	GO:0010717	regulation of epithelial to mesenchymal transition	42	0.0211268	4.5e-02	4.7e-02	1.5e+01	3.79131	0.791282	3	0.00869541	0.032967	167	4.4e-03	1.1e-02	1.1e+02	9.07495	0.33058	3	0.0714286
DNAm Beta-2-microglobulin	GO Biological Process	GO:0008284	positive regulation of cell proliferation	700	0.0915493	4.6e-02	4.7e-02	1.5e+01	1.6726	7.77231	13	0.0854101	0.142857	142	3.6e-03	1.0e-02	2.8e+02	2.35949	5.50967	13	0.0185714
DNAm Beta-2-microglobulin	GO Biological Process	GO:0051445	regulation of meiotic cell cycle	31	0.0140845	4.6e-02	4.7e-02	1.5e+01	5.88318	0.339952	2	0.00373574	0.021978	494	2.5e-02	3.5e-02	9.6e+01	8.19673	0.244	2	0.0645161
DNAm Beta-2-microglobulin	GO Biological Process	GO:0002718	regulation of cytokine production involved in immune response	42	0.0140845	4.6e-02	4.7e-02	1.5e+01	5.87406	0.34048	2	0.00374154	0.021978	653	4.3e-02	5.5e-02	1.9e+02	6.04997	0.33058	2	0.0476191
DNAm Beta-2-microglobulin	GO Biological Process	GO:0009890	negative regulation of biosynthetic process	1091	0.112676	4.6e-02	4.7e-02	1.5e+01	1.51358	11.8923	18	0.130685	0.197802	292	1.2e-02	2.1e-02	2.2e+02	1.86323	8.58722	16	0.0146654
DNAm Beta-2-microglobulin	GO Biological Process	GO:0000375	RNA splicing, via transesterification reactions	208	0.028169	4.6e-02	4.7e-02	1.5e+01	2.97625	1.34397	4	0.0147689	0.043956	985	8.2e-02	9.4e-02	1.9e+02	2.44326	1.63716	4	0.0192308
DNAm Beta-2-microglobulin	GO Biological Process	GO:0042180	cellular ketone metabolic process	55	0.0140845	4.7e-02	4.7e-02	1.5e+01	5.82877	0.343126	2	0.00377061	0.021978	904	7.0e-02	8.3e-02	2.4e+02	4.61997	0.432903	2	0.0363636
DNAm Beta-2-microglobulin	GO Biological Process	GO:0050679	positive regulation of epithelial cell proliferation	125	0.0352113	4.7e-02	4.7e-02	1.6e+01	2.55647	1.95582	5	0.0214925	0.0549451	123	3.1e-03	1.0e-02	1.9e+02	5.08197	0.98387	5	0.04
DNAm Beta-2-microglobulin	GO Biological Process	GO:0043009	chordate embryonic development	571	0.084507	4.7e-02	4.7e-02	1.6e+01	1.70879	7.02253	12	0.0771706	0.131868	82	1.9e-03	9.3e-03	1.9e+02	2.67004	4.49432	12	0.0210158
DNAm Beta-2-microglobulin	GO Cellular Component	GO:0042613	MHC class II protein complex	19	0.0140845	1.1e-09	2.7e-07	2.7e-07	114.873	0.0435263	5	0.000478311	0.0549451	6	9.6e-03	5.4e-01	2.2e+01	13.3736	0.149548	2	0.105263
DNAm Beta-2-microglobulin	GO Cellular Component	GO:0042611	MHC protein complex	27	0.0211268	1.7e-08	2.1e-06	4.1e-06	66.3676	0.075338	5	0.00082789	0.0549451	2	1.2e-03	2.9e-01	3.1e+00	14.1166	0.212516	3	0.111111
DNAm Beta-2-microglobulin	GO Cellular Component	GO:0042612	MHC class I protein complex	12	0.0140845	2.5e-07	2.0e-05	6.1e-05	78.4081	0.0510151	4	0.000560606	0.043956	3	3.9e-03	4.7e-01	1.7e+01	21.1749	0.0944515	2	0.166667
DNAm Beta-2-microglobulin	GO Cellular Component	GO:0071556	integral to lumenal side of endoplasmic reticulum membrane	24	0.0140845	1.3e-06	7.6e-05	3.1e-04	52.242	0.0765668	4	0.000841393	0.043956	7	1.5e-02	5.4e-01	2.2e-03	10.5874	0.188903	2	0.0833333
DNAm Beta-2-microglobulin	GO Cellular Component	GO:0012507	ER to Golgi transport vesicle membrane	34	0.0140845	3.6e-05	1.7e-03	8.7e-03	22.1557	0.18054	4	0.00198396	0.043956	17	2.9e-02	5.4e-01	1.4e-02	7.47349	0.267613	2	0.0588235
DNAm Beta-2-microglobulin	GO Cellular Component	GO:0030134	ER to Golgi transport vesicle	39	0.0140845	8.2e-05	3.3e-03	2.0e-02	17.8783	0.223735	4	0.00245863	0.043956	24	3.8e-02	5.4e-01	3.8e-02	6.51535	0.306968	2	0.0512821
DNAm Beta-2-microglobulin	GO Cellular Component	GO:0030670	phagocytic vesicle membrane	49	0.0140845	1.8e-04	6.4e-03	4.4e-02	14.4802	0.27624	4	0.00303561	0.043956	36	5.7e-02	5.4e-01	1.4e-01	5.18569	0.385677	2	0.0408163
DNAm Beta-2-microglobulin	GO Cellular Component	GO:0030658	transport vesicle membrane	76	0.0211268	2.6e-04	8.0e-03	6.4e-02	8.92776	0.560051	5	0.0061544	0.0549451	12	2.2e-02	5.4e-01	3.7e-01	5.0151	0.598193	3	0.0394737
DNAm Beta-2-microglobulin	GO Cellular Component	GO:0045335	phagocytic vesicle	66	0.0140845	6.8e-04	1.8e-02	1.6e-01	10.2286	0.39106	4	0.00429736	0.043956	57	9.5e-02	5.4e-01	9.0e+00	3.84998	0.519483	2	0.030303
DNAm Beta-2-microglobulin	MSigDB Cancer Neighborhood	GNF2_HLA-C	Neighborhood of HLA-C	47	0.028169	7.1e-08	1.1e-05	1.1e-05	29.4928	0.20344	6	0.0022356	0.0659341	1	5.0e-04	7.8e-02	1.4e+01	10.8127	0.369935	4	0.0851064
DNAm Beta-2-microglobulin	MSigDB Cancer Neighborhood	GNF2_INPP5D	Neighborhood of INPP5D	43	0.0211268	2.2e-06	1.0e-04	3.4e-04	24.6477	0.202859	5	0.00222922	0.0549451	3	4.7e-03	2.3e-01	2.0e+00	8.8639	0.338451	3	0.0697674
DNAm Beta-2-microglobulin	MSigDB Cancer Neighborhood	GNF2_CD48	Neighborhood of CD48	32	0.0211268	2.4e-06	1.0e-04	3.7e-04	24.1325	0.20719	5	0.00227681	0.0549451	2	2.0e-03	1.6e-01	1.1e+01	11.9109	0.251871	3	0.09375
DNAm Beta-2-microglobulin	MSigDB Cancer Neighborhood	GNF2_PTPN6	Neighborhood of PTPN6	47	0.0211268	2.6e-06	1.0e-04	4.0e-04	23.7587	0.210449	5	0.00231263	0.0549451	4	6.0e-03	2.3e-01	1.4e-03	8.10953	0.369935	3	0.0638298
DNAm Beta-2-microglobulin	MSigDB Cancer Neighborhood	GNF2_CD53	Neighborhood of CD53	58	0.0211268	2.4e-05	7.4e-04	3.7e-03	14.9744	0.333903	5	0.00366927	0.0549451	5	1.1e-02	3.3e-01	8.7e-03	6.57151	0.456516	3	0.0517241
DNAm Beta-2-microglobulin	MSigDB Cancer Neighborhood	GNF2_VAV1	Neighborhood of VAV1	36	0.0140845	5.3e-05	1.4e-03	8.3e-03	20.0071	0.199929	4	0.00219702	0.043956	9	3.3e-02	5.3e-01	2.4e-02	7.05829	0.283355	2	0.0555556
DNAm Beta-2-microglobulin	MSigDB Cancer Neighborhood	GNF2_PTPRC	Neighborhood of PTPRC	68	0.0211268	9.8e-05	2.2e-03	1.5e-02	11.0654	0.451859	5	0.00496548	0.0549451	6	1.6e-02	4.3e-01	8.8e-02	5.60512	0.535225	3	0.0441177
DNAm Beta-2-microglobulin	MSigDB Cancer Neighborhood	GNF2_CYP2B6	Neighborhood of CYP2B6	50	0.0140845	7.0e-04	1.3e-02	1.1e-01	17.6873	0.169613	3	0.00186388	0.032967	12	5.9e-02	7.6e-01	2.4e-01	5.08197	0.393548	2	0.04
DNAm Beta-2-microglobulin	MSigDB Cancer Neighborhood	GNF2_STAT6	Neighborhood of STAT6	79	0.0140845	8.8e-04	1.5e-02	1.4e-01	9.51677	0.420311	4	0.0046188	0.043956	18	1.3e-01	8.6e-01	5.7e+00	3.21644	0.621806	2	0.0253165
DNAm Beta-2-microglobulin	MSigDB Pathway	REACTOME_CLASS_I_MHC_MEDIATED_ANTIGEN_PROCESSING_PRESENTATION	Genes involved in Class I MHC mediated antigen processing &amp; presentation	241	0.0492958	1.6e-07	3.2e-05	6.6e-05	6.99682	1.71507	12	0.0188469	0.131868	13	3.0e-03	9.7e-02	3.8e+01	3.69023	1.8969	7	0.0290456
DNAm Beta-2-microglobulin	MSigDB Pathway	REACTOME_INTERFERON_ALPHA_BETA_SIGNALING	Genes involved in Interferon alpha/beta signaling	63	0.028169	1.9e-07	3.2e-05	7.9e-05	24.888	0.24108	6	0.00264923	0.0659341	8	1.5e-03	7.9e-02	5.3e+00	8.06662	0.49587	4	0.0634921
DNAm Beta-2-microglobulin	MSigDB Pathway	REACTOME_IMMUNE_SYSTEM	Genes involved in Immune System	902	0.126761	2.4e-07	3.2e-05	9.9e-05	3.45255	6.3721	22	0.0700231	0.241758	1	2.6e-04	6.2e-02	3.0e+01	2.53535	7.09961	18	0.0199556
DNAm Beta-2-microglobulin	MSigDB Pathway	KEGG_TYPE_I_DIABETES_MELLITUS	Type I diabetes mellitus	41	0.028169	3.1e-07	3.2e-05	1.3e-04	22.8518	0.262561	6	0.00288528	0.0659341	2	3.0e-04	6.2e-02	3.8e-03	12.395	0.322709	4	0.097561
DNAm Beta-2-microglobulin	MSigDB Pathway	REACTOME_IMMUNOREGULATORY_INTERACTIONS_BETWEEN_A_LYMPHOID_AND_A_NON_LYMPHOID_CELL	Genes involved in Immunoregulatory interactions between a Lymphoid and a non-Lymphoid cell	61	0.028169	4.1e-07	3.4e-05	1.7e-04	21.7528	0.275827	6	0.00303106	0.0659341	6	1.4e-03	7.9e-02	2.3e-02	8.3311	0.480129	4	0.0655738
DNAm Beta-2-microglobulin	MSigDB Pathway	KEGG_GRAFT_VERSUS_HOST_DISEASE	Graft-versus-host disease	37	0.0211268	6.7e-07	4.6e-05	2.8e-04	31.4395	0.159036	5	0.00174764	0.0549451	14	3.0e-03	9.7e-02	6.5e-02	10.3013	0.291226	3	0.0810811
DNAm Beta-2-microglobulin	MSigDB Pathway	REACTOME_ADAPTIVE_IMMUNE_SYSTEM	Genes involved in Adaptive Immune System	517	0.084507	1.1e-06	6.2e-05	4.4e-04	4.23097	3.78164	16	0.0415565	0.175824	4	8.1e-04	7.9e-02	2.4e-01	2.94892	4.06929	12	0.0232108
DNAm Beta-2-microglobulin	MSigDB Pathway	KEGG_ALLOGRAFT_REJECTION	Allograft rejection	35	0.0211268	1.4e-06	7.4e-05	5.9e-04	26.8931	0.185921	5	0.00204309	0.0549451	10	2.6e-03	9.7e-02	6.3e-01	10.8899	0.275484	3	0.0857143
DNAm Beta-2-microglobulin	MSigDB Pathway	KEGG_AUTOIMMUNE_THYROID_DISEASE	Autoimmune thyroid disease	50	0.0211268	2.3e-06	1.0e-04	9.4e-04	24.4489	0.204508	5	0.00224734	0.0549451	18	7.1e-03	1.6e-01	1.5e+01	7.62296	0.393548	3	0.06
DNAm Beta-2-microglobulin	MSigDB Pathway	REACTOME_ANTIGEN_PRESENTATION_FOLDING_ASSEMBLY_AND_PEPTIDE_LOADING_OF_CLASS_I_MHC	Genes involved in Antigen Presentation: Folding, assembly and peptide loading of class I MHC	20	0.0140845	2.5e-06	1.1e-04	1.1e-03	43.7651	0.091397	4	0.00100436	0.043956	21	1.1e-02	2.2e-01	1.1e+00	12.7049	0.157419	2	0.1
DNAm Beta-2-microglobulin	MSigDB Pathway	KEGG_ANTIGEN_PROCESSING_AND_PRESENTATION	Antigen processing and presentation	80	0.0211268	2.9e-06	1.1e-04	1.2e-03	23.2365	0.215179	5	0.0023646	0.0549451	45	2.5e-02	2.4e-01	1.0e-01	4.76435	0.629677	3	0.0375
DNAm Beta-2-microglobulin	MSigDB Pathway	REACTOME_INTERFERON_GAMMA_SIGNALING	Genes involved in Interferon gamma signaling	60	0.028169	4.5e-06	1.5e-04	1.9e-03	14.3644	0.417699	6	0.0045901	0.0659341	5	1.3e-03	7.9e-02	6.8e+00	8.46995	0.472258	4	0.0666667
DNAm Beta-2-microglobulin	MSigDB Pathway	REACTOME_ER_PHAGOSOME_PATHWAY	Genes involved in ER-Phagosome pathway	60	0.0211268	8.7e-06	2.8e-04	3.6e-03	18.5113	0.270106	5	0.00296819	0.0549451	23	1.2e-02	2.2e-01	4.3e+00	6.35246	0.472258	3	0.05
DNAm Beta-2-microglobulin	MSigDB Pathway	REACTOME_ANTIGEN_PROCESSING_CROSS_PRESENTATION	Genes involved in Antigen processing-Cross presentation	74	0.0211268	4.0e-05	1.2e-03	1.7e-02	13.4245	0.372453	5	0.00409289	0.0549451	37	2.1e-02	2.3e-01	9.9e-01	5.15065	0.582451	3	0.0405405
DNAm Beta-2-microglobulin	MSigDB Pathway	REACTOME_ANTIGEN_PROCESSING_UBIQUITINATION_PROTEASOME_DEGRADATION	Genes involved in Antigen processing: Ubiquitination &amp; Proteasome degradation	204	0.0352113	1.3e-04	3.5e-03	5.3e-02	5.39103	1.48395	8	0.0163071	0.0879121	41	2.3e-02	2.3e-01	2.3e+01	3.11395	1.60568	5	0.0245098
DNAm Beta-2-microglobulin	MSigDB Pathway	KEGG_VIRAL_MYOCARDITIS	Viral myocarditis	68	0.0211268	1.8e-04	4.7e-03	7.5e-02	9.69905	0.515514	5	0.00566499	0.0549451	32	1.6e-02	2.2e-01	2.8e+01	5.60512	0.535225	3	0.0441177
DNAm Beta-2-microglobulin	MSigDB Pathway	REACTOME_INTERFERON_SIGNALING	Genes involved in Interferon Signaling	154	0.028169	2.8e-04	6.8e-03	1.1e-01	6.78769	0.883953	6	0.00971377	0.0659341	51	3.4e-02	2.8e-01	6.7e+00	3.29998	1.21213	4	0.025974
DNAm Beta-2-microglobulin	MSigDB Pathway	KEGG_NOTCH_SIGNALING_PATHWAY	Notch signaling pathway	47	0.0140845	3.5e-04	8.1e-03	1.5e-01	12.1872	0.328212	4	0.00360673	0.043956	58	5.3e-02	3.8e-01	5.1e+01	5.40635	0.369935	2	0.0425532
DNAm Beta-2-microglobulin	MSigDB Pathway	KEGG_NATURAL_KILLER_CELL_MEDIATED_CYTOTOXICITY	Natural killer cell mediated cytotoxicity	132	0.028169	1.6e-03	3.3e-02	6.5e-01	5.99916	0.833449	5	0.00915878	0.0549451	36	2.0e-02	2.3e-01	5.4e+01	3.84998	1.03897	4	0.030303
DNAm Beta-2-microglobulin	MSigDB Pathway	REACTOME_INSULIN_SYNTHESIS_AND_PROCESSING	Genes involved in Insulin Synthesis and Processing	20	0.0211268	1.6e-03	3.3e-02	6.7e-01	13.1797	0.227623	3	0.00250135	0.032967	3	4.9e-04	6.8e-02	1.9e+01	19.0574	0.157419	3	0.15
DNAm Beta-2-microglobulin	MSigDB Pathway	REACTOME_ABORTIVE_ELONGATION_OF_HIV1_TRANSCRIPT_IN_THE_ABSENCE_OF_TAT	Genes involved in Abortive elongation of HIV-1 transcript in the absence of Tat	23	0.0140845	1.7e-03	3.4e-02	7.2e-01	33.2248	0.060196	2	0.000661495	0.021978	26	1.4e-02	2.2e-01	3.8e+01	11.0478	0.181032	2	0.0869565
DNAm Beta-2-microglobulin	MSigDB Pathway	PID_IL4_2PATHWAY	IL4-mediated signaling events	62	0.028169	2.0e-03	3.8e-02	8.4e-01	7.575	0.528053	4	0.00580278	0.043956	7	1.4e-03	7.9e-02	1.6e+00	8.19673	0.488	4	0.0645161
DNAm Beta-2-microglobulin	MSigDB Pathway	BIOCARTA_IL22BP_PATHWAY	IL22 Soluble Receptor Signaling Pathway	16	0.0140845	2.2e-03	3.9e-02	9.0e-01	29.5136	0.0677654	2	0.000744674	0.021978	17	6.9e-03	1.6e-01	4.4e+00	15.8812	0.125935	2	0.125
DNAm Beta-2-microglobulin	MSigDB Predicted Promoter Motifs	V$IRF2_01	Motif GAAAAGYGAAASY matches IRF2: interferon regulatory factor 2	120	0.0492958	2.7e-06	1.2e-03	1.3e-03	6.70827	1.4907	10	0.0163813	0.10989	1	4.6e-05	2.3e-02	4.5e+01	7.41121	0.944515	7	0.0583333
DNAm Beta-2-microglobulin	MSigDB Predicted Promoter Motifs	V$IRF1_01	Motif SAAAAGYGAAACC matches IRF1: interferon regulatory factor 1	242	0.056338	4.8e-06	1.2e-03	2.4e-03	4.27392	3.27568	14	0.0359965	0.153846	4	6.7e-04	8.4e-02	6.4e+00	4.19998	1.90477	8	0.0330578
DNAm Beta-2-microglobulin	MSigDB Predicted Promoter Motifs	V$IRF_Q6	Motif BNCRSTTTCANTTYY matches IRF1: interferon regulatory factor 1	237	0.0492958	1.7e-05	2.9e-03	8.7e-03	4.08332	3.18368	13	0.0349855	0.142857	5	2.7e-03	1.3e-01	3.6e+01	3.75251	1.86542	7	0.0295359
DNAm Beta-2-microglobulin	MSigDB Predicted Promoter Motifs	V$ISRE_01	Motif CAGTTTCWCTTTYCC matches STAT1: signal transducer and activator of transcription 1, 91kDa&lt;br&gt; STAT2: signal transducer and activator of transcription 2, 113kDa	239	0.0422535	4.5e-05	5.7e-03	2.3e-02	4.0063	2.99528	12	0.0329152	0.131868	24	1.2e-02	2.3e-01	4.6e-03	3.18952	1.88116	6	0.0251046
DNAm Beta-2-microglobulin	MSigDB Predicted Promoter Motifs	V$AP2_Q6_01	Motif SNNNCCNCAGGCN matches GTF3A: general transcription factor IIIA	260	0.0492958	2.5e-04	2.4e-02	1.2e-01	3.90637	2.55992	10	0.028131	0.10989	17	4.6e-03	1.3e-01	2.8e-02	3.42056	2.04645	7	0.0269231
DNAm Beta-2-microglobulin	MSigDB Predicted Promoter Motifs	V$MAZ_Q6	Motif GGGGAGGG matches MAZ: MYC-associated zinc finger protein (purine-binding transcription factor)	184	0.0422535	2.8e-04	2.4e-02	1.4e-01	5.56044	1.25889	7	0.013834	0.0769231	9	3.4e-03	1.3e-01	7.9e-02	4.14291	1.44826	6	0.0326087
DNAm Beta-2-microglobulin	MSigDB Predicted Promoter Motifs	V$IRF7_01	Motif TNSGAAWNCGAAANTNNN matches IRF7: interferon regulatory factor 7	238	0.056338	3.8e-04	2.6e-02	1.9e-01	3.41751	3.21871	11	0.0353705	0.120879	3	6.0e-04	8.4e-02	2.9e-01	4.27057	1.87329	8	0.0336135
DNAm Beta-2-microglobulin	MSigDB Predicted Promoter Motifs	V$COUP_DR1_Q6	Motif TGACCTTTGACCC matches PITX2: paired-like homeodomain transcription factor 2	232	0.0352113	4.1e-04	2.6e-02	2.1e-01	4.52783	1.76685	8	0.0194159	0.0879121	46	3.7e-02	3.9e-01	7.6e-01	2.73813	1.82606	5	0.0215517
DNAm Beta-2-microglobulin	MSigDB Predicted Promoter Motifs	V$COUP_01	Motif TGAMCTTTGMMCYT matches HNF4A: hepatocyte nuclear factor 4, alpha	251	0.0422535	5.2e-04	2.9e-02	2.6e-01	3.9023	2.30633	9	0.0253443	0.0989011	30	1.5e-02	2.4e-01	1.9e+01	3.03703	1.97561	6	0.0239044
DNAm Beta-2-microglobulin	MSigDB Predicted Promoter Motifs	V$HNF4_01_B	Motif NRGGNCAAAGGTCAN matches HNF4A: hepatocyte nuclear factor 4, alpha	245	0.0422535	9.6e-04	4.8e-02	4.8e-01	3.57716	2.51596	9	0.027648	0.0989011	27	1.3e-02	2.3e-01	1.3e+00	3.11141	1.92839	6	0.0244898
DNAm Beta-2-microglobulin	MSigDB Immunologic Signatures	GSE1460_DP_THYMOCYTE_VS_THYMIC_STROMAL_CELL_UP	Genes up-regulated in comparison of CD4 [GeneID=920] CD8 thymocytes versus thymic stromal cells.	186	0.0633803	2.7e-05	1.4e-02	1.4e-02	5.79363	1.55343	9	0.0170706	0.0989011	1	1.7e-05	8.3e-03	4.5e+01	6.14755	1.464	9	0.0483871

## Sheet: Cystatin_C
DNAm	Database	ID	Desc	GeneSetSize	GeneSetCov	BinomP	Binom.FDR	Binom.Bon	RegionFoldEnrich	ExpRegions	ObsRegions	GenomeFrac	SetCov	HyperRank	HyperP	Hyper.FDR	Hyper.Bon	GeneFoldEnrich	ExpGenes	ObsGenes	TermCov
DNAm Cystatin-C	GO Molecular Function	GO:0001103	RNA polymerase II repressing transcription factor binding	27	0.027027	9.6e-05	3.7e-02	3.8e-02	17.1475	0.23327	4	0.00268127	0.045977	1	6.6e-05	1.4e-02	2.6e-02	18.0591	0.221496	4	0.148148
DNAm Cystatin-C	GO Molecular Function	GO:0031432	titin binding	14	0.0202703	1.9e-04	3.7e-02	7.4e-02	27.6991	0.108307	3	0.0012449	0.0344828	4	1.8e-04	1.8e-02	7.2e-02	26.1211	0.114849	3	0.214286
DNAm Cystatin-C	GO Biological Process	GO:0043010	camera-type eye development	250	0.0810811	4.2e-04	4.2e-02	1.3e-01	3.37241	3.26176	11	0.0374915	0.126437	1	1.1e-06	1.8e-04	2.0e-02	5.85114	2.05088	12	0.048
DNAm Cystatin-C	GO Biological Process	GO:0071363	cellular response to growth factor stimulus	532	0.101351	8.0e-04	4.2e-02	2.5e-01	2.51901	5.95471	15	0.068445	0.172414	12	3.3e-05	1.1e-03	5.7e-02	3.43699	4.36428	15	0.0281955
DNAm Cystatin-C	GO Biological Process	GO:0043068	positive regulation of programmed cell death	350	0.0675676	1.0e-03	4.2e-02	3.1e-01	3.02697	3.63399	11	0.0417701	0.126437	41	6.3e-04	6.7e-03	2.2e-02	3.48282	2.87124	10	0.0285714
DNAm Cystatin-C	GO Biological Process	GO:0070848	response to growth factor stimulus	545	0.101351	1.2e-03	4.2e-02	3.6e-01	2.42776	6.17855	15	0.0710178	0.172414	14	4.3e-05	1.2e-03	3.5e-02	3.35501	4.47093	15	0.0275229
DNAm Cystatin-C	GO Biological Process	GO:0019233	sensory perception of pain	62	0.0337838	1.2e-03	4.2e-02	3.6e-01	6.41794	0.779066	5	0.00895478	0.0574713	20	1.5e-04	3.7e-03	3.6e+01	9.83054	0.508619	5	0.0806452
DNAm Cystatin-C	GO Biological Process	GO:0001654	eye development	289	0.0810811	1.3e-03	4.2e-02	4.1e-01	2.92368	3.76239	11	0.0432458	0.126437	4	4.8e-06	3.2e-04	3.1e+01	5.06154	2.37082	12	0.0415225
DNAm Cystatin-C	GO Biological Process	GO:0045214	sarcomere organization	26	0.0202703	1.3e-03	4.2e-02	4.1e-01	14.0904	0.212911	3	0.00244725	0.0344828	73	1.2e-03	7.3e-03	1.3e-01	14.0652	0.213292	3	0.115385
DNAm Cystatin-C	GO Biological Process	GO:0045332	phospholipid translocation	14	0.00675676	1.3e-03	4.2e-02	4.1e-01	14.0658	0.213283	3	0.00245153	0.0344828	1061	1.1e-01	1.1e-01	3.2e+01	8.70705	0.114849	1	0.0714286
DNAm Cystatin-C	GO Biological Process	GO:0010942	positive regulation of cell death	370	0.0675676	1.3e-03	4.2e-02	4.1e-01	2.92143	3.76527	11	0.043279	0.126437	60	9.7e-04	7.1e-03	2.6e+00	3.29456	3.03531	10	0.027027
DNAm Cystatin-C	GO Biological Process	GO:0003002	regionalization	300	0.0743243	1.5e-03	4.2e-02	4.7e-01	2.87298	3.82878	11	0.044009	0.126437	13	3.8e-05	1.2e-03	5.5e-01	4.46962	2.46106	11	0.0366667
DNAm Cystatin-C	GO Biological Process	GO:0008285	negative regulation of cell proliferation	555	0.108108	1.8e-03	4.2e-02	5.5e-01	2.32337	6.45615	15	0.0742086	0.172414	7	1.3e-05	5.9e-04	1.1e+00	3.51419	4.55296	16	0.0288288
DNAm Cystatin-C	GO Biological Process	GO:0048011	neurotrophin TRK receptor signaling pathway	277	0.0608108	2.1e-03	4.2e-02	6.6e-01	3.17849	2.83153	9	0.0325463	0.103448	33	4.8e-04	6.6e-03	1.3e+00	3.96061	2.27238	9	0.032491
DNAm Cystatin-C	GO Biological Process	GO:0030540	female genitalia development	16	0.0202703	2.5e-03	4.2e-02	7.8e-01	11.2442	0.266804	3	0.00306671	0.0344828	26	2.8e-04	5.1e-03	1.3e+00	22.856	0.131257	3	0.1875
DNAm Cystatin-C	GO Biological Process	GO:0071310	cellular response to organic substance	1498	0.162162	2.7e-03	4.2e-02	8.3e-01	1.786	13.4378	24	0.154458	0.275862	67	1.1e-03	7.2e-03	2.4e-01	1.95298	12.2889	24	0.0160214
DNAm Cystatin-C	GO Biological Process	GO:0019371	cyclooxygenase pathway	13	0.0135135	2.7e-03	4.2e-02	8.5e-01	26.1779	0.0764003	2	0.000878164	0.0229885	180	4.9e-03	1.2e-02	7.0e+01	18.7536	0.106646	2	0.153846
DNAm Cystatin-C	GO Biological Process	GO:0070887	cellular response to chemical stimulus	1864	0.189189	2.8e-03	4.2e-02	8.5e-01	1.69957	15.8864	27	0.182602	0.310345	69	1.1e-03	7.2e-03	9.0e-01	1.8311	15.2914	28	0.0150215
DNAm Cystatin-C	GO Biological Process	GO:0097035	regulation of membrane lipid distribution	21	0.00675676	2.8e-03	4.2e-02	8.7e-01	10.8085	0.27756	3	0.00319034	0.0344828	1283	1.6e-01	1.6e-01	2.9e+00	5.8047	0.172274	1	0.0476191
DNAm Cystatin-C	GO Biological Process	GO:0038179	neurotrophin signaling pathway	280	0.0608108	2.9e-03	4.2e-02	9.0e-01	3.03572	2.9647	9	0.034077	0.103448	37	5.1e-04	6.6e-03	1.5e+00	3.91817	2.29699	9	0.0321429
DNAm Cystatin-C	GO Biological Process	GO:0042981	regulation of apoptotic process	1159	0.128378	3.0e-03	4.2e-02	9.2e-01	1.91543	10.4415	20	0.120017	0.229885	139	3.0e-03	1.0e-02	2.3e+00	1.99834	9.5079	19	0.0163934
DNAm Cystatin-C	GO Biological Process	GO:0019369	arachidonic acid metabolic process	53	0.0202703	3.2e-03	4.2e-02	9.8e-01	10.3581	0.289627	3	0.00332905	0.0344828	284	9.4e-03	1.7e-02	4.9e+00	6.89992	0.434787	3	0.0566038
DNAm Cystatin-C	GO Biological Process	GO:0043065	positive regulation of apoptotic process	343	0.0608108	3.3e-03	4.2e-02	1.0e+00	2.76988	3.61027	10	0.0414973	0.114943	112	2.1e-03	8.5e-03	2.0e+00	3.19851	2.81381	9	0.0262391
DNAm Cystatin-C	GO Biological Process	GO:0043067	regulation of programmed cell death	1171	0.128378	3.4e-03	4.2e-02	1.1e+00	1.89419	10.5586	20	0.121363	0.229885	145	3.4e-03	1.1e-02	8.9e-01	1.97786	9.60634	19	0.0162254
DNAm Cystatin-C	GO Biological Process	GO:0035883	enteroendocrine cell differentiation	16	0.0202703	3.7e-03	4.2e-02	1.1e+00	9.8341	0.305061	3	0.00350645	0.0344828	26	2.8e-04	5.1e-03	6.3e+01	22.856	0.131257	3	0.1875
DNAm Cystatin-C	GO Biological Process	GO:0060575	intestinal epithelial cell differentiation	12	0.0135135	4.0e-03	4.2e-02	1.2e+00	21.6565	0.0923509	2	0.0010615	0.0229885	170	4.2e-03	1.1e-02	6.6e+01	20.3164	0.0984424	2	0.166667
DNAm Cystatin-C	GO Biological Process	GO:0009653	anatomical structure morphogenesis	1898	0.243243	4.2e-03	4.2e-02	1.3e+00	1.53715	21.4683	33	0.246762	0.37931	2	1.2e-06	1.8e-04	6.4e+01	2.31209	15.5703	36	0.0189673
DNAm Cystatin-C	GO Biological Process	GO:0097190	apoptotic signaling pathway	283	0.0405405	4.3e-03	4.2e-02	1.3e+00	3.45403	2.02662	7	0.0232945	0.0804598	508	2.9e-02	3.7e-02	7.0e+01	2.58442	2.3216	6	0.0212014
DNAm Cystatin-C	GO Biological Process	GO:0007202	activation of phospholipase C activity	60	0.027027	4.4e-03	4.2e-02	1.4e+00	6.08973	0.656844	4	0.00754993	0.045977	84	1.5e-03	7.6e-03	5.2e-01	8.12658	0.492212	4	0.0666667
DNAm Cystatin-C	GO Biological Process	GO:0048598	embryonic morphogenesis	508	0.108108	4.4e-03	4.2e-02	1.4e+00	2.1864	6.40323	14	0.0736003	0.160919	3	4.4e-06	3.2e-04	8.9e-01	3.83933	4.1674	16	0.0314961
DNAm Cystatin-C	GO Biological Process	GO:0002066	columnar/cuboidal epithelial cell development	22	0.0202703	4.9e-03	4.2e-02	1.5e+00	8.84787	0.339065	3	0.00389729	0.0344828	46	7.4e-04	6.7e-03	7.1e+00	16.6225	0.180478	3	0.136364
DNAm Cystatin-C	GO Biological Process	GO:0007369	gastrulation	126	0.0405405	5.1e-03	4.2e-02	1.6e+00	3.80964	1.57495	6	0.0181029	0.0689655	40	6.0e-04	6.7e-03	2.8e-01	5.8047	1.03365	6	0.0476191
DNAm Cystatin-C	GO Biological Process	GO:0010941	regulation of cell death	1210	0.128378	5.3e-03	4.2e-02	1.6e+00	1.82177	10.9783	20	0.126188	0.229885	177	4.8e-03	1.2e-02	3.6e+00	1.91411	9.92628	19	0.0157025
DNAm Cystatin-C	GO Biological Process	GO:0010033	response to organic substance	2054	0.195946	5.7e-03	4.2e-02	1.8e+00	1.59395	17.5664	28	0.201913	0.321839	123	2.4e-03	8.9e-03	3.9e+00	1.72106	16.8501	29	0.0141188
DNAm Cystatin-C	GO Biological Process	GO:0010604	positive regulation of macromolecule metabolic process	1997	0.202703	5.7e-03	4.2e-02	1.8e+00	1.55636	19.2757	30	0.22156	0.344828	44	7.4e-04	6.7e-03	8.2e+00	1.83123	16.3825	30	0.0150225
DNAm Cystatin-C	GO Biological Process	GO:0035307	positive regulation of protein dephosphorylation	15	0.0135135	5.7e-03	4.2e-02	1.8e+00	17.8877	0.111809	2	0.00128516	0.0229885	212	6.5e-03	1.4e-02	3.6e+00	16.2532	0.123053	2	0.133333
DNAm Cystatin-C	GO Biological Process	GO:0008637	apoptotic mitochondrial changes	49	0.0202703	5.8e-03	4.2e-02	1.8e+00	8.35815	0.358931	3	0.00412564	0.0344828	229	7.6e-03	1.5e-02	9.1e+00	7.46318	0.401973	3	0.0612245
DNAm Cystatin-C	GO Biological Process	GO:0035306	positive regulation of dephosphorylation	16	0.0135135	6.1e-03	4.2e-02	1.9e+00	17.3727	0.115123	2	0.00132325	0.0229885	222	7.4e-03	1.5e-02	5.3e+01	15.2373	0.131257	2	0.125
DNAm Cystatin-C	GO Biological Process	GO:0007492	endoderm development	51	0.027027	6.3e-03	4.2e-02	1.9e+00	5.50073	0.727176	4	0.00835834	0.045977	53	8.1e-04	6.7e-03	5.9e+00	9.56068	0.41838	4	0.0784314
DNAm Cystatin-C	GO Biological Process	GO:0060322	head development	52	0.027027	6.4e-03	4.2e-02	2.0e+00	5.45826	0.732834	4	0.00842338	0.045977	55	8.7e-04	6.9e-03	1.4e+02	9.37682	0.426584	4	0.0769231
DNAm Cystatin-C	GO Biological Process	GO:0006839	mitochondrial transport	131	0.027027	6.7e-03	4.2e-02	2.1e+00	5.39399	0.741566	4	0.00852375	0.045977	423	2.3e-02	3.1e-02	6.4e+01	3.7221	1.07466	4	0.0305343
DNAm Cystatin-C	GO Biological Process	GO:0007179	transforming growth factor beta receptor signaling pathway	126	0.0337838	6.8e-03	4.2e-02	2.1e+00	4.2301	1.182	5	0.0135863	0.0574713	163	3.8e-03	1.1e-02	1.4e+01	4.83725	1.03365	5	0.0396825
DNAm Cystatin-C	GO Biological Process	GO:0071495	cellular response to endogenous stimulus	786	0.114865	6.9e-03	4.2e-02	2.1e+00	1.95424	8.18734	16	0.0941074	0.183908	23	2.5e-04	5.1e-03	2.8e+01	2.63648	6.44798	17	0.0216285
DNAm Cystatin-C	GO Biological Process	GO:0015914	phospholipid transport	38	0.00675676	6.9e-03	4.2e-02	2.1e+00	7.82554	0.38336	3	0.00440644	0.0344828	1712	2.7e-01	2.7e-01	8.2e-01	3.20786	0.311734	1	0.0263158
DNAm Cystatin-C	GO Biological Process	GO:0035304	regulation of protein dephosphorylation	19	0.0135135	7.0e-03	4.2e-02	2.2e+00	16.1331	0.123969	2	0.00142493	0.0229885	292	1.0e-02	1.7e-02	1.5e+00	12.8314	0.155867	2	0.105263
DNAm Cystatin-C	GO Biological Process	GO:0051173	positive regulation of nitrogen compound metabolic process	1300	0.148649	7.0e-03	4.2e-02	2.2e+00	1.68392	13.6586	23	0.156996	0.264368	58	9.3e-04	7.0e-03	2.1e+01	2.0629	10.6646	22	0.0169231
DNAm Cystatin-C	GO Biological Process	GO:0035196	production of miRNAs involved in gene silencing by miRNA	14	0.0135135	7.0e-03	4.2e-02	2.2e+00	16.1113	0.124136	2	0.00142686	0.0229885	193	5.7e-03	1.3e-02	1.4e+01	17.4141	0.114849	2	0.142857
DNAm Cystatin-C	GO Biological Process	GO:0046902	regulation of mitochondrial membrane permeability	21	0.0135135	7.2e-03	4.2e-02	2.2e+00	15.9501	0.125391	2	0.00144128	0.0229885	319	1.3e-02	2.0e-02	2.8e+01	11.6094	0.172274	2	0.0952381
DNAm Cystatin-C	GO Biological Process	GO:0010628	positive regulation of gene expression	1165	0.141892	7.2e-03	4.2e-02	2.2e+00	1.70837	12.8778	22	0.14802	0.252874	38	5.5e-04	6.7e-03	2.8e+01	2.19732	9.55712	21	0.0180258
DNAm Cystatin-C	GO Biological Process	GO:0010863	positive regulation of phospholipase C activity	67	0.027027	7.2e-03	4.2e-02	2.2e+00	5.2743	0.758395	4	0.00871718	0.045977	116	2.2e-03	8.7e-03	4.3e+00	7.27753	0.549637	4	0.0597015
DNAm Cystatin-C	GO Biological Process	GO:0001516	prostaglandin biosynthetic process	20	0.0135135	7.4e-03	4.2e-02	2.3e+00	15.7295	0.12715	2	0.00146149	0.0229885	310	1.2e-02	1.9e-02	1.2e+00	12.1899	0.164071	2	0.1
DNAm Cystatin-C	GO Biological Process	GO:0009893	positive regulation of metabolic process	2153	0.209459	7.6e-03	4.2e-02	2.3e+00	1.51123	20.5131	31	0.235783	0.356322	72	1.2e-03	7.3e-03	3.4e+01	1.75516	17.6622	31	0.0143985
DNAm Cystatin-C	GO Biological Process	GO:0070918	production of small RNA involved in gene silencing by RNA	15	0.0135135	7.9e-03	4.2e-02	2.4e+00	15.1441	0.132065	2	0.00151798	0.0229885	212	6.5e-03	1.4e-02	2.8e+01	16.2532	0.123053	2	0.133333
DNAm Cystatin-C	GO Biological Process	GO:1900274	regulation of phospholipase C activity	68	0.027027	8.0e-03	4.2e-02	2.5e+00	5.13034	0.779676	4	0.00896179	0.045977	121	2.4e-03	8.9e-03	3.2e+00	7.17051	0.55784	4	0.0588235
DNAm Cystatin-C	GO Biological Process	GO:0071560	cellular response to transforming growth factor beta stimulus	156	0.0405405	8.1e-03	4.2e-02	2.5e+00	3.45363	1.73731	6	0.019969	0.0689655	102	1.8e-03	8.1e-03	9.1e-01	4.68841	1.27975	6	0.0384615
DNAm Cystatin-C	GO Biological Process	GO:0007423	sensory organ development	455	0.101351	8.1e-03	4.2e-02	2.5e+00	2.11203	6.15522	13	0.0707496	0.149425	5	5.2e-06	3.2e-04	2.3e+01	4.01864	3.73261	15	0.032967
DNAm Cystatin-C	GO Biological Process	GO:0033233	regulation of protein sumoylation	16	0.0135135	8.3e-03	4.2e-02	2.5e+00	14.8161	0.134988	2	0.00155159	0.0229885	222	7.4e-03	1.5e-02	2.8e+00	15.2373	0.131257	2	0.125
DNAm Cystatin-C	GO Biological Process	GO:0031328	positive regulation of cellular biosynthetic process	1357	0.148649	8.5e-03	4.2e-02	2.6e+00	1.65685	13.8818	23	0.159561	0.264368	94	1.6e-03	7.6e-03	2.2e+01	1.97625	11.1322	22	0.0162122
DNAm Cystatin-C	GO Biological Process	GO:0007167	enzyme linked receptor protein signaling pathway	759	0.108108	8.5e-03	4.2e-02	2.6e+00	1.90921	8.38043	16	0.0963268	0.183908	36	5.1e-04	6.6e-03	2.9e+01	2.56967	6.22648	16	0.0210804
DNAm Cystatin-C	GO Biological Process	GO:0060068	vagina development	11	0.0135135	8.6e-03	4.2e-02	2.7e+00	14.5017	0.137915	2	0.00158523	0.0229885	149	3.5e-03	1.1e-02	1.9e+01	22.1634	0.0902389	2	0.181818
DNAm Cystatin-C	GO Biological Process	GO:0001706	endoderm formation	28	0.0202703	8.7e-03	4.2e-02	2.7e+00	7.16445	0.418734	3	0.00481303	0.0344828	89	1.5e-03	7.6e-03	1.9e+01	13.0606	0.229699	3	0.107143
DNAm Cystatin-C	GO Biological Process	GO:0006693	prostaglandin metabolic process	25	0.0135135	8.8e-03	4.2e-02	2.7e+00	14.3686	0.139193	2	0.00159992	0.0229885	387	1.8e-02	2.5e-02	1.8e+01	9.75189	0.205088	2	0.08
DNAm Cystatin-C	GO Biological Process	GO:0071559	response to transforming growth factor beta stimulus	157	0.0405405	8.8e-03	4.2e-02	2.7e+00	3.39521	1.7672	6	0.0203126	0.0689655	107	1.9e-03	8.1e-03	2.4e+01	4.65855	1.28795	6	0.0382166
DNAm Cystatin-C	GO Biological Process	GO:0021515	cell differentiation in spinal cord	50	0.027027	8.9e-03	4.2e-02	2.7e+00	4.9707	0.804716	4	0.00924961	0.045977	47	7.5e-04	6.7e-03	6.6e+00	9.75189	0.410177	4	0.08
DNAm Cystatin-C	GO Biological Process	GO:0009952	anterior/posterior pattern specification	195	0.0472973	8.9e-03	4.2e-02	2.7e+00	3.00856	2.32669	7	0.0267436	0.0804598	70	1.1e-03	7.2e-03	9.8e+00	4.37585	1.59969	7	0.0358974
DNAm Cystatin-C	GO Biological Process	GO:0070932	histone H3 deacetylation	16	0.0135135	9.2e-03	4.2e-02	2.8e+00	14.0329	0.142522	2	0.00163818	0.0229885	222	7.4e-03	1.5e-02	3.1e+01	15.2373	0.131257	2	0.125
DNAm Cystatin-C	GO Biological Process	GO:0021517	ventral spinal cord development	41	0.027027	9.3e-03	4.2e-02	2.9e+00	4.8964	0.816926	4	0.00938995	0.045977	28	3.5e-04	5.8e-03	3.9e+01	11.8925	0.336345	4	0.097561
DNAm Cystatin-C	GO Biological Process	GO:0007169	transmembrane receptor protein tyrosine kinase signaling pathway	565	0.0878378	9.4e-03	4.2e-02	2.9e+00	2.07368	6.26905	13	0.0720581	0.149425	51	7.8e-04	6.7e-03	4.9e+01	2.80475	4.635	13	0.0230089
DNAm Cystatin-C	GO Biological Process	GO:0009953	dorsal/ventral pattern formation	90	0.0337838	9.4e-03	4.2e-02	2.9e+00	3.90636	1.27996	5	0.0147122	0.0574713	56	8.7e-04	6.9e-03	3.3e+01	6.77215	0.738318	5	0.0555556
DNAm Cystatin-C	GO Biological Process	GO:0048562	embryonic organ morphogenesis	266	0.0608108	9.4e-03	4.2e-02	2.9e+00	2.52343	3.56657	9	0.0409951	0.103448	29	3.5e-04	5.8e-03	4.6e+01	4.12439	2.18214	9	0.0338346
DNAm Cystatin-C	GO Biological Process	GO:0042108	positive regulation of cytokine biosynthetic process	60	0.0202703	9.5e-03	4.2e-02	2.9e+00	6.95509	0.431339	3	0.00495792	0.0344828	326	1.3e-02	2.0e-02	6.3e+00	6.09493	0.492212	3	0.05
DNAm Cystatin-C	GO Biological Process	GO:0070933	histone H4 deacetylation	15	0.0135135	9.6e-03	4.2e-02	3.0e+00	13.7167	0.145807	2	0.00167595	0.0229885	212	6.5e-03	1.4e-02	2.7e+01	16.2532	0.123053	2	0.133333
DNAm Cystatin-C	GO Biological Process	GO:0048596	embryonic camera-type eye morphogenesis	27	0.0202703	9.6e-03	4.2e-02	3.0e+00	6.91417	0.433891	3	0.00498726	0.0344828	82	1.4e-03	7.4e-03	6.3e-01	13.5443	0.221496	3	0.111111
DNAm Cystatin-C	GO Biological Process	GO:0001756	somitogenesis	61	0.027027	9.9e-03	4.2e-02	3.1e+00	4.81301	0.831081	4	0.00955266	0.045977	93	1.6e-03	7.6e-03	2.5e+01	7.99335	0.500416	4	0.0655738
DNAm Cystatin-C	GO Biological Process	GO:0009891	positive regulation of biosynthetic process	1380	0.148649	1.0e-02	4.2e-02	3.2e+00	1.63088	14.1029	23	0.162102	0.264368	109	2.0e-03	8.3e-03	6.4e-01	1.94331	11.3209	22	0.015942
DNAm Cystatin-C	GO Biological Process	GO:0071359	cellular response to dsRNA	24	0.0135135	1.0e-02	4.2e-02	3.2e+00	13.1676	0.151889	2	0.00174584	0.0229885	376	1.6e-02	2.4e-02	3.3e+00	10.1582	0.196885	2	0.0833333
DNAm Cystatin-C	GO Biological Process	GO:0030239	myofibril assembly	44	0.0202703	1.1e-02	4.2e-02	3.3e+00	6.68679	0.448646	3	0.00515685	0.0344828	192	5.6e-03	1.3e-02	5.6e-01	8.31127	0.360956	3	0.0681818
DNAm Cystatin-C	GO Biological Process	GO:0051240	positive regulation of multicellular organismal process	585	0.0878378	1.1e-02	4.2e-02	3.3e+00	2.04298	6.36325	13	0.0731408	0.149425	66	1.1e-03	7.2e-03	1.8e+01	2.70886	4.79907	13	0.0222222
DNAm Cystatin-C	GO Biological Process	GO:0090009	primitive streak formation	10	0.0135135	1.1e-02	4.2e-02	3.3e+00	13.0153	0.153665	2	0.00176626	0.0229885	136	2.9e-03	9.8e-03	5.2e+01	24.3797	0.0820354	2	0.2
DNAm Cystatin-C	GO Biological Process	GO:0048513	organ development	2361	0.263514	1.1e-02	4.2e-02	3.3e+00	1.42444	24.571	35	0.282426	0.402299	6	1.1e-05	5.6e-04	5.5e+01	2.01357	19.3685	39	0.0165184
DNAm Cystatin-C	GO Biological Process	GO:0002520	immune system development	473	0.0743243	1.1e-02	4.3e-02	3.4e+00	2.20573	4.987	11	0.0573219	0.126437	104	1.8e-03	8.1e-03	2.7e+01	2.83485	3.88027	11	0.0232558
DNAm Cystatin-C	GO Biological Process	GO:0007049	cell cycle	1235	0.114865	1.1e-02	4.3e-02	3.4e+00	1.81141	9.38493	17	0.107873	0.195402	469	2.5e-02	3.3e-02	2.4e+01	1.67796	10.1314	17	0.0137652
DNAm Cystatin-C	GO Biological Process	GO:0030878	thyroid gland development	19	0.0135135	1.1e-02	4.3e-02	3.5e+00	12.6389	0.158241	2	0.00181887	0.0229885	292	1.0e-02	1.7e-02	4.6e+00	12.8314	0.155867	2	0.105263
DNAm Cystatin-C	GO Biological Process	GO:0045935	positive regulation of nucleobase-containing compound metabolic process	1273	0.141892	1.2e-02	4.3e-02	3.6e+00	1.63831	13.4285	22	0.154351	0.252874	95	1.7e-03	7.8e-03	3.6e+01	2.0109	10.4431	21	0.0164965
DNAm Cystatin-C	GO Biological Process	GO:0060041	retina development in camera-type eye	108	0.0337838	1.2e-02	4.3e-02	3.6e+00	3.69349	1.35373	5	0.0155601	0.0574713	108	2.0e-03	8.3e-03	2.4e+01	5.64346	0.885982	5	0.0462963
DNAm Cystatin-C	GO Biological Process	GO:0060047	heart contraction	48	0.0202703	1.2e-02	4.3e-02	3.7e+00	6.37494	0.470593	3	0.00540911	0.0344828	219	7.1e-03	1.5e-02	9.8e+00	7.61867	0.39377	3	0.0625
DNAm Cystatin-C	GO Biological Process	GO:0003012	muscle system process	242	0.0472973	1.2e-02	4.3e-02	3.7e+00	2.8346	2.46948	7	0.0283849	0.0804598	166	3.9e-03	1.1e-02	1.7e+01	3.52599	1.98526	7	0.0289256
DNAm Cystatin-C	GO Biological Process	GO:0012501	programmed cell death	1054	0.101351	1.2e-02	4.3e-02	3.7e+00	1.83674	8.71107	16	0.100127	0.183908	483	2.6e-02	3.4e-02	3.5e+01	1.7348	8.64653	15	0.0142315
DNAm Cystatin-C	GO Biological Process	GO:0015748	organophosphate ester transport	55	0.00675676	1.2e-02	4.3e-02	3.8e+00	6.28846	0.477064	3	0.0054835	0.0344828	1904	3.6e-01	3.7e-01	4.0e+01	2.21634	0.451194	1	0.0181818
DNAm Cystatin-C	GO Biological Process	GO:0014898	cardiac muscle hypertrophy in response to stress	12	0.0135135	1.2e-02	4.3e-02	3.9e+00	11.9254	0.167709	2	0.00192769	0.0229885	170	4.2e-03	1.1e-02	8.7e+00	20.3164	0.0984424	2	0.166667
DNAm Cystatin-C	GO Biological Process	GO:0018022	peptidyl-lysine methylation	26	0.0135135	1.2e-02	4.3e-02	3.9e+00	11.9187	0.167803	2	0.00192877	0.0229885	397	1.9e-02	2.7e-02	2.4e+01	9.37682	0.213292	2	0.0769231
DNAm Cystatin-C	GO Biological Process	GO:0006690	icosanoid metabolic process	80	0.0202703	1.3e-02	4.3e-02	3.9e+00	6.25984	0.479246	3	0.00550857	0.0344828	499	2.8e-02	3.5e-02	2.4e+01	4.5712	0.656283	3	0.0375
DNAm Cystatin-C	GO Biological Process	GO:0048048	embryonic eye morphogenesis	32	0.0202703	1.3e-02	4.3e-02	3.9e+00	6.24287	0.480548	3	0.00552354	0.0344828	117	2.3e-03	8.7e-03	1.4e+02	11.428	0.262513	3	0.09375
DNAm Cystatin-C	GO Biological Process	GO:0010518	positive regulation of phospholipase activity	78	0.027027	1.3e-02	4.4e-02	4.0e+00	4.42782	0.903379	4	0.0103837	0.045977	167	3.9e-03	1.1e-02	2.9e+01	6.25121	0.639876	4	0.0512821
DNAm Cystatin-C	GO Biological Process	GO:0021879	forebrain neuron differentiation	45	0.027027	1.3e-02	4.4e-02	4.1e+00	4.41412	0.906183	4	0.0104159	0.045977	35	5.0e-04	6.6e-03	7.1e+00	10.8354	0.369159	4	0.0888889
DNAm Cystatin-C	GO Biological Process	GO:0002067	glandular epithelial cell differentiation	27	0.0202703	1.3e-02	4.4e-02	4.1e+00	6.11245	0.490802	3	0.0056414	0.0344828	82	1.4e-03	7.4e-03	3.8e+01	13.5443	0.221496	3	0.111111
DNAm Cystatin-C	GO Biological Process	GO:0051094	positive regulation of developmental process	745	0.114865	1.4e-02	4.4e-02	4.2e+00	1.7703	9.60289	17	0.110378	0.195402	18	1.3e-04	3.4e-03	4.1e+01	2.78158	6.11163	17	0.0228188
DNAm Cystatin-C	GO Biological Process	GO:0051146	striated muscle cell differentiation	160	0.0405405	1.4e-02	4.4e-02	4.2e+00	3.07632	1.95039	6	0.0224182	0.0689655	110	2.1e-03	8.4e-03	3.6e+01	4.5712	1.31257	6	0.0375
DNAm Cystatin-C	GO Biological Process	GO:0009887	organ morphogenesis	767	0.128378	1.4e-02	4.4e-02	4.3e+00	1.76695	9.6211	17	0.110587	0.195402	8	1.7e-05	6.6e-04	1.7e+01	3.01965	6.29211	19	0.0247718
DNAm Cystatin-C	GO Biological Process	GO:0060193	positive regulation of lipase activity	86	0.027027	1.5e-02	4.6e-02	4.5e+00	4.29028	0.93234	4	0.0107166	0.045977	190	5.5e-03	1.3e-02	2.9e+01	5.66971	0.705504	4	0.0465116
DNAm Cystatin-C	GO Biological Process	GO:0001676	long-chain fatty acid metabolic process	83	0.0202703	1.5e-02	4.6e-02	4.6e+00	5.88297	0.509946	3	0.00586145	0.0344828	516	3.1e-02	3.8e-02	6.9e+01	4.40597	0.680894	3	0.0361446
DNAm Cystatin-C	GO Biological Process	GO:0048146	positive regulation of fibroblast proliferation	43	0.0202703	1.5e-02	4.6e-02	4.6e+00	5.8697	0.5111	3	0.00587471	0.0344828	187	5.3e-03	1.3e-02	2.7e+01	8.50456	0.352752	3	0.0697674
DNAm Cystatin-C	GO Biological Process	GO:0009880	embryonic pattern specification	60	0.027027	1.5e-02	4.7e-02	4.7e+00	4.21886	0.948124	4	0.010898	0.045977	84	1.5e-03	7.6e-03	6.2e+01	8.12658	0.492212	4	0.0666667
DNAm Cystatin-C	GO Biological Process	GO:0048592	eye morphogenesis	131	0.0405405	1.6e-02	4.8e-02	4.9e+00	2.97592	2.01619	6	0.0231745	0.0689655	45	7.4e-04	6.7e-03	2.4e+01	5.58314	1.07466	6	0.0458015
DNAm Cystatin-C	GO Biological Process	GO:0060338	regulation of type I interferon-mediated signaling pathway	37	0.0135135	1.6e-02	4.8e-02	5.1e+00	10.3023	0.194132	2	0.00223141	0.0229885	565	3.7e-02	4.4e-02	7.3e+00	6.58912	0.303531	2	0.054054
DNAm Cystatin-C	GO Biological Process	GO:0044802	single-organism membrane organization	512	0.0472973	1.7e-02	4.8e-02	5.3e+00	2.28317	3.94188	9	0.045309	0.103448	1152	1.3e-01	1.3e-01	2.4e+01	1.66658	4.20021	7	0.0136719
DNAm Cystatin-C	GO Biological Process	GO:0051592	response to calcium ion	93	0.027027	1.7e-02	4.8e-02	5.3e+00	4.07744	0.981008	4	0.011276	0.045977	220	7.2e-03	1.5e-02	2.9e+01	5.24295	0.762929	4	0.0430108
DNAm Cystatin-C	GO Biological Process	GO:0010517	regulation of phospholipase activity	85	0.027027	1.7e-02	4.8e-02	5.3e+00	4.06797	0.983291	4	0.0113022	0.045977	188	5.3e-03	1.3e-02	5.3e+01	5.73641	0.697301	4	0.0470588
DNAm Cystatin-C	GO Biological Process	GO:0033559	unsaturated fatty acid metabolic process	92	0.0202703	1.7e-02	4.8e-02	5.3e+00	5.54392	0.541133	3	0.00621992	0.0344828	579	4.0e-02	4.7e-02	3.1e+01	3.97496	0.754725	3	0.0326087
DNAm Cystatin-C	GO Biological Process	GO:0021521	ventral spinal cord interneuron specification	10	0.0135135	1.7e-02	4.8e-02	5.4e+00	10.002	0.199961	2	0.0022984	0.0229885	136	2.9e-03	9.8e-03	3.8e+01	24.3797	0.0820354	2	0.2
DNAm Cystatin-C	GO Biological Process	GO:0010557	positive regulation of macromolecule biosynthetic process	1268	0.135135	1.7e-02	4.8e-02	5.4e+00	1.60275	13.1024	21	0.150603	0.241379	156	3.6e-03	1.1e-02	2.7e+01	1.92269	10.4021	20	0.0157729
DNAm Cystatin-C	GO Biological Process	GO:0007626	locomotory behavior	160	0.0405405	1.8e-02	4.8e-02	5.4e+00	2.90649	2.06434	6	0.0237281	0.0689655	110	2.1e-03	8.4e-03	2.2e+01	4.5712	1.31257	6	0.0375
DNAm Cystatin-C	GO Biological Process	GO:0061053	somite development	69	0.027027	1.8e-02	4.8e-02	5.5e+00	4.02935	0.992716	4	0.0114105	0.045977	124	2.5e-03	9.0e-03	3.4e+01	7.06659	0.566044	4	0.057971
DNAm Cystatin-C	GO Biological Process	GO:0009895	negative regulation of catabolic process	99	0.027027	1.8e-02	4.8e-02	5.5e+00	4.02921	0.992751	4	0.0114109	0.045977	280	9.0e-03	1.6e-02	1.8e+01	4.9252	0.81215	4	0.040404
DNAm Cystatin-C	GO Biological Process	GO:0010035	response to inorganic substance	326	0.0472973	1.8e-02	4.8e-02	5.7e+00	2.60291	2.68929	7	0.0309114	0.0804598	393	1.8e-02	2.6e-02	8.1e+00	2.61746	2.67435	7	0.0214724
DNAm Cystatin-C	GO Biological Process	GO:0031076	embryonic camera-type eye development	37	0.0202703	1.9e-02	4.8e-02	5.8e+00	5.38053	0.557566	3	0.0064088	0.0344828	147	3.4e-03	1.1e-02	2.5e+01	9.88367	0.303531	3	0.0810811
DNAm Cystatin-C	GO Biological Process	GO:0035116	embryonic hindlimb morphogenesis	30	0.0202703	1.9e-02	4.8e-02	5.8e+00	5.3705	0.558608	3	0.00642078	0.0344828	106	1.9e-03	8.1e-03	8.9e+01	12.1899	0.246106	3	0.1
DNAm Cystatin-C	GO Biological Process	GO:0060579	ventral spinal cord interneuron fate commitment	11	0.0135135	1.9e-02	4.8e-02	5.8e+00	9.56889	0.209011	2	0.00240242	0.0229885	149	3.5e-03	1.1e-02	5.5e+01	22.1634	0.0902389	2	0.181818
DNAm Cystatin-C	GO Biological Process	GO:0071634	regulation of transforming growth factor beta production	17	0.0135135	1.9e-02	4.8e-02	5.8e+00	9.56129	0.209177	2	0.00240433	0.0229885	270	8.4e-03	1.5e-02	4.5e+01	14.341	0.13946	2	0.117647
DNAm Cystatin-C	GO Biological Process	GO:0007368	determination of left/right symmetry	88	0.027027	1.9e-02	4.8e-02	5.9e+00	3.94894	1.01293	4	0.0116429	0.045977	202	6.0e-03	1.3e-02	2.4e+01	5.54085	0.721911	4	0.0454546
DNAm Cystatin-C	GO Biological Process	GO:0003015	heart process	51	0.0202703	1.9e-02	4.8e-02	5.9e+00	5.32298	0.563594	3	0.00647809	0.0344828	275	8.4e-03	1.5e-02	3.4e+01	7.17051	0.41838	3	0.0588235
DNAm Cystatin-C	GO Biological Process	GO:0001942	hair follicle development	77	0.027027	1.9e-02	4.8e-02	6.0e+00	3.93327	1.01697	4	0.0116893	0.045977	159	3.7e-03	1.1e-02	4.5e+01	6.3324	0.631672	4	0.0519481
DNAm Cystatin-C	GO Biological Process	GO:0035195	gene silencing by miRNA	29	0.0135135	1.9e-02	4.8e-02	6.0e+00	9.42473	0.212208	2	0.00243917	0.0229885	427	2.3e-02	3.1e-02	6.2e+01	8.4068	0.237903	2	0.0689655
DNAm Cystatin-C	GO Biological Process	GO:0048593	camera-type eye morphogenesis	96	0.0337838	1.9e-02	4.8e-02	6.0e+00	3.24734	1.53972	5	0.017698	0.0574713	71	1.2e-03	7.2e-03	3.4e+01	6.34889	0.787539	5	0.0520833
DNAm Cystatin-C	GO Biological Process	GO:0031032	actomyosin structure organization	58	0.0202703	2.0e-02	4.8e-02	6.1e+00	5.27186	0.569059	3	0.00654091	0.0344828	316	1.2e-02	1.9e-02	3.6e+01	6.3051	0.475805	3	0.0517241
DNAm Cystatin-C	GO Biological Process	GO:0035987	endodermal cell differentiation	16	0.0135135	2.0e-02	4.8e-02	6.3e+00	9.21693	0.216992	2	0.00249416	0.0229885	222	7.4e-03	1.5e-02	3.8e+01	15.2373	0.131257	2	0.125
DNAm Cystatin-C	GO Biological Process	GO:0032731	positive regulation of interleukin-1 beta production	23	0.0135135	2.0e-02	4.8e-02	6.3e+00	9.21686	0.216994	2	0.00249418	0.0229885	337	1.5e-02	2.2e-02	5.0e+01	10.5999	0.188681	2	0.0869565
DNAm Cystatin-C	GO Biological Process	GO:0042633	hair cycle	81	0.027027	2.0e-02	4.8e-02	6.3e+00	3.87625	1.03193	4	0.0118612	0.045977	175	4.4e-03	1.2e-02	2.7e+01	6.01969	0.664486	4	0.0493827
DNAm Cystatin-C	GO Biological Process	GO:1901698	response to nitrogen compound	674	0.0810811	2.0e-02	4.8e-02	6.3e+00	1.93586	6.1988	12	0.0712506	0.137931	289	9.6e-03	1.7e-02	4.7e+01	2.1703	5.52918	12	0.0178042
DNAm Cystatin-C	GO Biological Process	GO:0002088	lens development in camera-type eye	63	0.027027	2.1e-02	4.8e-02	6.3e+00	3.8608	1.03605	4	0.0119087	0.045977	98	1.8e-03	8.1e-03	3.2e+01	7.7396	0.516823	4	0.0634921
DNAm Cystatin-C	GO Biological Process	GO:0001947	heart looping	51	0.0202703	2.1e-02	4.8e-02	6.5e+00	5.13195	0.584573	3	0.00671923	0.0344828	275	8.4e-03	1.5e-02	2.4e+01	7.17051	0.41838	3	0.0588235
DNAm Cystatin-C	GO Biological Process	GO:0021872	forebrain generation of neurons	56	0.027027	2.1e-02	4.8e-02	6.6e+00	3.82131	1.04676	4	0.0120317	0.045977	68	1.1e-03	7.2e-03	1.0e+02	8.70705	0.459398	4	0.0714286
DNAm Cystatin-C	GO Biological Process	GO:0048534	hematopoietic or lymphoid organ development	447	0.0675676	2.1e-02	4.8e-02	6.6e+00	2.08838	4.78839	10	0.055039	0.114943	165	3.9e-03	1.1e-02	1.0e+02	2.72704	3.66698	10	0.0223714
DNAm Cystatin-C	GO Biological Process	GO:0035194	posttranscriptional gene silencing by RNA	32	0.0135135	2.1e-02	4.8e-02	6.6e+00	8.94062	0.223698	2	0.00257124	0.0229885	503	2.8e-02	3.5e-02	2.4e+01	7.61867	0.262513	2	0.0625
DNAm Cystatin-C	GO Biological Process	GO:0008219	cell death	1236	0.108108	2.2e-02	4.8e-02	6.7e+00	1.68255	10.1037	17	0.116135	0.195402	655	4.7e-02	5.3e-02	1.1e+02	1.57798	10.1396	16	0.012945
DNAm Cystatin-C	GO Biological Process	GO:0001704	formation of primary germ layer	84	0.027027	2.2e-02	4.8e-02	6.7e+00	3.79757	1.0533	4	0.012107	0.045977	184	5.0e-03	1.2e-02	3.6e+01	5.8047	0.689097	4	0.0476191
DNAm Cystatin-C	GO Biological Process	GO:0031325	positive regulation of cellular metabolic process	2039	0.189189	2.2e-02	4.8e-02	6.7e+00	1.44278	19.4069	28	0.223068	0.321839	173	4.2e-03	1.1e-02	3.4e+01	1.67394	16.727	28	0.0137322
DNAm Cystatin-C	GO Biological Process	GO:0043584	nose development	14	0.0135135	2.2e-02	4.8e-02	6.8e+00	8.81631	0.226852	2	0.0026075	0.0229885	193	5.7e-03	1.3e-02	2.9e+01	17.4141	0.114849	2	0.142857
DNAm Cystatin-C	GO Biological Process	GO:0060324	face development	38	0.0202703	2.2e-02	4.8e-02	6.8e+00	5.05653	0.593292	3	0.00681945	0.0344828	158	3.7e-03	1.1e-02	2.4e+01	9.62358	0.311734	3	0.0789474
DNAm Cystatin-C	GO Biological Process	GO:0031324	negative regulation of cellular metabolic process	1474	0.162162	2.2e-02	4.8e-02	6.8e+00	1.544	14.2487	22	0.163779	0.252874	57	9.1e-04	7.0e-03	5.8e+01	1.98478	12.092	24	0.0162822
DNAm Cystatin-C	GO Biological Process	GO:0060900	embryonic camera-type eye formation	11	0.0135135	2.2e-02	4.8e-02	6.8e+00	8.78071	0.227772	2	0.00261807	0.0229885	149	3.5e-03	1.1e-02	4.0e+01	22.1634	0.0902389	2	0.181818
DNAm Cystatin-C	GO Biological Process	GO:0007389	pattern specification process	424	0.0743243	2.2e-02	4.8e-02	6.9e+00	1.98612	5.53844	11	0.0636602	0.126437	48	7.6e-04	6.7e-03	8.1e+01	3.16247	3.4783	11	0.0259434
DNAm Cystatin-C	GO Biological Process	GO:0021675	nerve development	69	0.027027	2.2e-02	4.8e-02	6.9e+00	3.76428	1.06262	4	0.012214	0.045977	124	2.5e-03	9.0e-03	1.5e+01	7.06659	0.566044	4	0.057971
DNAm Cystatin-C	GO Biological Process	GO:0016265	death	1239	0.108108	2.2e-02	4.8e-02	6.9e+00	1.67591	10.1438	17	0.116595	0.195402	657	4.8e-02	5.4e-02	7.8e+01	1.57415	10.1642	16	0.0129136
DNAm Cystatin-C	GO Biological Process	GO:0006915	apoptotic process	1040	0.0945946	2.3e-02	4.9e-02	7.0e+00	1.74991	8.57187	15	0.0985272	0.172414	654	4.7e-02	5.3e-02	7.0e+01	1.64094	8.53168	14	0.0134615
DNAm Cystatin-C	GO Biological Process	GO:0061371	determination of heart left/right asymmetry	54	0.0202703	2.3e-02	4.9e-02	7.0e+00	4.99082	0.601104	3	0.00690924	0.0344828	290	9.9e-03	1.7e-02	3.4e+01	6.77215	0.442991	3	0.0555556
DNAm Cystatin-C	GO Biological Process	GO:0009719	response to endogenous stimulus	1140	0.135135	2.3e-02	4.9e-02	7.2e+00	1.63644	10.9995	18	0.126431	0.206897	65	1.0e-03	7.2e-03	8.2e+01	2.13857	9.35203	20	0.0175439
DNAm Cystatin-C	GO Biological Process	GO:0016310	phosphorylation	968	0.101351	2.3e-02	4.9e-02	7.2e+00	1.74194	8.61108	15	0.098978	0.172414	327	1.3e-02	2.1e-02	5.3e+01	1.88892	7.94102	15	0.0154959
DNAm Cystatin-C	GO Biological Process	GO:0043588	skin development	279	0.0472973	2.3e-02	4.9e-02	7.2e+00	2.47615	2.82697	7	0.0324939	0.0804598	269	8.3e-03	1.5e-02	8.1e+01	3.05839	2.28879	7	0.0250896
DNAm Cystatin-C	GO Cellular Component	GO:0005829	cytosol	2588	0.25	1.2e-05	2.8e-03	2.8e-03	1.98463	18.1394	36	0.208499	0.413793	1	4.1e-04	9.9e-02	1.6e-02	1.74276	21.2308	37	0.0142968
DNAm Cystatin-C	MSigDB Pathway	REACTOME_SMAD2_SMAD3_SMAD4_HETEROTRIMER_REGULATES_TRANSCRIPTION	Genes involved in SMAD2/SMAD3:SMAD4 heterotrimer regulates transcription	25	0.027027	6.2e-05	2.8e-02	2.8e-02	19.2357	0.207946	4	0.00239019	0.045977	1	4.8e-05	2.2e-02	3.0e-02	19.5038	0.205088	4	0.16
DNAm Cystatin-C	MSigDB Immunologic Signatures	GSE36476_YOUNG_VS_OLD_DONOR_MEMORY_CD4_TCELL_40H_TSST_ACT_DN	Genes down-regulated in comparison of memory CD4 [GeneID=920] T cells from young donors treated with TSST at 40 h versus those from old donors treated with TSST at 40 h.	210	0.0472973	7.7e-06	3.9e-03	3.9e-03	6.79581	1.32435	9	0.0152224	0.103448	8	1.8e-03	9.8e-02	3.3e-02	4.06329	1.72274	7	0.0333333
DNAm Cystatin-C	MSigDB Immunologic Signatures	GSE8384_CTRL_VS_B_ABORTUS_4H_MAC_CELL_LINE_DN	Genes down-regulated in comparison of control RAW264.7 cells (macrophages) versus those infected with B. abortus.	197	0.0472973	1.7e-04	4.3e-02	8.6e-02	6.03359	1.16017	7	0.0133353	0.0804598	7	1.2e-03	8.7e-02	9.2e-02	4.33142	1.6161	7	0.035533

## Sheet: GDF_15
DNAm	Database	ID	Desc	GeneSetSize	GeneSetCov	BinomP	Binom.FDR	Binom.Bon	RegionFoldEnrich	ExpRegions	ObsRegions	GenomeFrac	SetCov	HyperRank	HyperP	Hyper.FDR	Hyper.Bon	GeneFoldEnrich	ExpGenes	ObsGenes	TermCov
DNAm Growth differentiation factor 15	MSigDB Cancer Neighborhood	GCM_PRKCG	Neighborhood of PRKCG	59	0.0175439	1.2e-04	2.7e-02	3.1e-02	10.7186	0.46648	5	0.00340497	0.0364963	5	6.6e-03	3.5e-01	1.4e+00	5.36456	0.745635	4	0.0677966
DNAm Growth differentiation factor 15	MSigDB Cancer Neighborhood	MORF_USP5	Neighborhood of USP5	52	0.0175439	2.0e-04	2.7e-02	5.4e-02	14.1482	0.282722	4	0.00206366	0.0291971	1	4.2e-03	3.5e-01	2.2e+00	6.08671	0.65717	4	0.0769231
DNAm Growth differentiation factor 15	MSigDB Cancer Neighborhood	MORF_DAP3	Neighborhood of DAP3	194	0.0307017	5.5e-04	4.9e-02	1.5e-01	5.01884	1.39475	7	0.0101806	0.0510949	7	1.2e-02	4.5e-01	2.6e+00	2.85511	2.45175	7	0.0360825
DNAm Growth differentiation factor 15	MSigDB Immunologic Signatures	GSE22886_NAIVE_CD4_TCELL_VS_48H_ACT_TH2_UP	Genes up-regulated in comparison of naive CD4 [GeneID=920] T cells versus stimulated CD4 [GeneID=920] Th2 cells at 48 h.	190	0.0438597	7.8e-05	3.9e-02	3.9e-02	4.57641	2.18512	10	0.0159498	0.0729927	1	1.6e-04	7.8e-02	2.6e+00	4.16459	2.4012	10	0.0526316

## Sheet: leptin
DNAm	Database	ID	Desc	GeneSetSize	GeneSetCov	BinomP	Binom.FDR	Binom.Bon	RegionFoldEnrich	ExpRegions	ObsRegions	GenomeFrac	SetCov	HyperRank	HyperP	Hyper.FDR	Hyper.Bon	GeneFoldEnrich	ExpGenes	ObsGenes	TermCov
DNAm Leptin	GO Biological Process	GO:0060713	labyrinthine layer morphogenesis	17	0.00692042	1.4e-04	1.9e-02	4.4e-02	10.3034	0.485279	5	0.00259508	0.026738	305	3.0e-02	6.1e-02	3.2e+00	7.34419	0.272324	2	0.117647
DNAm Leptin	GO Biological Process	GO:0060712	spongiotrophoblast layer development	11	0.00692042	1.7e-04	1.9e-02	5.3e-02	14.805	0.270178	4	0.0014448	0.0213904	160	1.3e-02	4.4e-02	9.0e+00	11.3501	0.17621	2	0.181818
DNAm Leptin	GO Biological Process	GO:0060669	embryonic placenta morphogenesis	20	0.00692042	1.9e-04	1.9e-02	5.7e-02	9.71254	0.514798	5	0.00275293	0.026738	409	4.0e-02	7.1e-02	3.9e-01	6.24256	0.320381	2	0.1
DNAm Leptin	GO Biological Process	GO:0044092	negative regulation of molecular function	797	0.0968858	3.0e-04	2.3e-02	9.2e-02	1.98946	14.5768	29	0.0779508	0.15508	9	8.7e-05	6.7e-03	5.6e-01	2.19312	12.7672	28	0.0351317
DNAm Leptin	GO Biological Process	GO:0060711	labyrinthine layer development	42	0.0103806	4.5e-04	2.8e-02	1.4e-01	6.25226	0.959654	6	0.00513184	0.0320856	302	3.0e-02	6.1e-02	2.8e+00	4.45897	0.672801	3	0.0714286
DNAm Leptin	MSigDB Cancer Neighborhood	MORF_AP2M1	Neighborhood of AP2M1	217	0.0380623	4.6e-06	1.2e-03	1.2e-03	5.73819	1.91698	11	0.0102512	0.0588235	2	7.8e-04	9.9e-02	2.7e+00	3.16443	3.47614	11	0.0506912
DNAm Leptin	MSigDB Cancer Neighborhood	MORF_PRKAR1A	Neighborhood of PRKAR1A	143	0.0346021	1.5e-05	2.0e-03	3.9e-03	5.59907	1.78601	10	0.00955087	0.0534759	1	1.0e-04	2.7e-02	7.6e+00	4.36543	2.29073	10	0.0699301
DNAm Leptin	MSigDB Cancer Neighborhood	MORF_PSMC1	Neighborhood of PSMC1	193	0.0311419	7.3e-05	6.2e-03	1.9e-02	5.19493	1.73246	9	0.00926448	0.0481283	3	4.0e-03	2.6e-01	3.3e-01	2.91104	3.09168	9	0.0466321
DNAm Leptin	MSigDB Cancer Neighborhood	MORF_DDB1	Neighborhood of DDB1	240	0.0346021	2.0e-04	1.3e-02	5.0e-02	4.10574	2.43561	10	0.0130247	0.0534759	5	5.5e-03	2.7e-01	4.7e-01	2.60107	3.84458	10	0.0416667
DNAm Leptin	MSigDB Cancer Neighborhood	MORF_RAB1A	Neighborhood of RAB1A	193	0.0311419	4.8e-04	2.1e-02	1.2e-01	4.01952	2.23907	9	0.0119736	0.0481283	3	4.0e-03	2.6e-01	2.3e+00	2.91104	3.09168	9	0.0466321
DNAm Leptin	MSigDB Cancer Neighborhood	MORF_ACTG1	Neighborhood of ACTG1	144	0.0242214	5.1e-04	2.1e-02	1.3e-01	5.11238	1.36923	7	0.00732206	0.0374332	7	8.6e-03	2.7e-01	2.7e+00	3.03458	2.30675	7	0.0486111
DNAm Leptin	MSigDB Cancer Neighborhood	MORF_NME2	Neighborhood of NME2	158	0.0242214	5.7e-04	2.1e-02	1.5e-01	5.01424	1.39603	7	0.00746537	0.0374332	10	1.4e-02	3.5e-01	8.6e-01	2.76569	2.53101	7	0.0443038
DNAm Leptin	MSigDB Cancer Neighborhood	MORF_PRKAG1	Neighborhood of PRKAG1	218	0.0311419	9.0e-04	2.9e-02	2.3e-01	3.66769	2.45386	9	0.0131223	0.0481283	8	8.7e-03	2.7e-01	6.7e+00	2.5772	3.49216	9	0.0412844

## Sheet: pai_1
DNAm	Database	ID	Desc	GeneSetSize	GeneSetCov	BinomP	Binom.FDR	Binom.Bon	RegionFoldEnrich	ExpRegions	ObsRegions	GenomeFrac	SetCov	HyperRank	HyperP	Hyper.FDR	Hyper.Bon	GeneFoldEnrich	ExpGenes	ObsGenes	TermCov
DNAm Plasminogen activator inhibitor 1	GO Biological Process	GO:0032365	intracellular lipid transport	19	0.0120846	3.8e-07	1.1e-04	1.1e-04	22.4687	0.267039	6	0.00126559	0.028436	10	3.5e-04	1.2e-02	1.3e-01	11.4746	0.348595	4	0.210526
DNAm Plasminogen activator inhibitor 1	GO Biological Process	GO:0042755	eating behavior	23	0.0151057	1.7e-05	2.6e-03	5.3e-03	11.439	0.52452	6	0.00248588	0.028436	4	5.2e-05	3.9e-03	1.2e+00	11.8488	0.421983	5	0.217391
DNAm Plasminogen activator inhibitor 1	GO Biological Process	GO:0010745	negative regulation of macrophage derived foam cell differentiation	13	0.00906344	3.2e-05	3.2e-03	9.6e-03	23.1475	0.172805	4	0.000818982	0.0189574	29	1.5e-03	2.2e-02	8.0e+00	12.578	0.238512	3	0.230769
DNAm Plasminogen activator inhibitor 1	GO Biological Process	GO:0045834	positive regulation of lipid metabolic process	99	0.0271903	1.6e-04	1.2e-02	4.9e-02	4.21312	2.37354	10	0.011249	0.0473934	6	8.6e-05	4.2e-03	1.8e+01	4.95496	1.81636	9	0.0909091
DNAm Plasminogen activator inhibitor 1	GO Biological Process	GO:0061515	myeloid cell development	31	0.0120846	3.0e-04	1.6e-02	9.2e-02	8.75568	0.571057	5	0.00270643	0.0236967	40	2.4e-03	2.5e-02	2.6e+01	7.03284	0.56876	4	0.129032
DNAm Plasminogen activator inhibitor 1	GO Biological Process	GO:0006631	fatty acid metabolic process	269	0.0392749	3.4e-04	1.6e-02	1.0e-01	2.95873	4.73177	14	0.0224254	0.0663507	28	1.5e-03	2.2e-02	5.2e+00	2.63405	4.93537	13	0.0483271
DNAm Plasminogen activator inhibitor 1	GO Biological Process	GO:0019216	regulation of lipid metabolic process	228	0.0422961	4.1e-04	1.6e-02	1.2e-01	2.77106	5.41308	15	0.0256544	0.0710901	5	8.6e-05	4.2e-03	3.7e+01	3.34677	4.18314	14	0.0614035
DNAm Plasminogen activator inhibitor 1	GO Biological Process	GO:1902001	fatty acid transmembrane transport	11	0.0060423	4.5e-04	1.6e-02	1.4e-01	20.6641	0.145179	3	0.000688053	0.014218	154	1.7e-02	5.0e-02	6.9e+01	9.90991	0.201818	2	0.181818
DNAm Plasminogen activator inhibitor 1	GO Biological Process	GO:0045638	negative regulation of myeloid cell differentiation	78	0.0151057	5.1e-04	1.6e-02	1.5e-01	4.45539	1.79558	8	0.00850985	0.0379147	140	1.4e-02	5.0e-02	7.9e+00	3.49388	1.43107	5	0.0641026
DNAm Plasminogen activator inhibitor 1	GO Biological Process	GO:0090179	planar cell polarity pathway involved in neural tube closure	13	0.00906344	5.8e-04	1.6e-02	1.8e-01	10.7639	0.371612	4	0.00176119	0.0189574	29	1.5e-03	2.2e-02	7.4e+01	12.578	0.238512	3	0.230769
DNAm Plasminogen activator inhibitor 1	GO Biological Process	GO:0048821	erythrocyte development	24	0.00906344	5.9e-04	1.6e-02	1.8e-01	10.7183	0.373192	4	0.00176868	0.0189574	105	9.3e-03	4.3e-02	4.9e+01	6.81307	0.44033	3	0.125
DNAm Plasminogen activator inhibitor 1	GO Biological Process	GO:0015879	carnitine transport	13	0.0060423	7.0e-04	1.8e-02	2.1e-01	17.761	0.168909	3	0.000800518	0.014218	266	2.3e-02	5.5e-02	6.9e+01	8.38531	0.238512	2	0.153846
DNAm Plasminogen activator inhibitor 1	GO Biological Process	GO:0046907	intracellular transport	1098	0.0876133	9.0e-04	1.9e-02	2.7e-01	1.7771	18.5696	33	0.0880077	0.156398	319	3.1e-02	6.3e-02	2.5e+01	1.43955	20.1451	29	0.0264117
DNAm Plasminogen activator inhibitor 1	GO Biological Process	GO:0010875	positive regulation of cholesterol efflux	11	0.0060423	1.0e-03	1.9e-02	3.1e-01	15.5091	0.193435	3	0.000916755	0.014218	154	1.7e-02	5.0e-02	2.9e-02	9.90991	0.201818	2	0.181818
DNAm Plasminogen activator inhibitor 1	GO Biological Process	GO:0019217	regulation of fatty acid metabolic process	70	0.0181269	1.1e-03	1.9e-02	3.2e-01	4.50056	1.55536	7	0.00737138	0.0331754	32	1.8e-03	2.3e-02	5.6e+00	4.67182	1.2843	6	0.0857143
DNAm Plasminogen activator inhibitor 1	GO Biological Process	GO:0070206	protein trimerization	32	0.00906344	1.1e-03	1.9e-02	3.5e-01	8.94075	0.44739	4	0.00212033	0.0189574	247	2.0e-02	5.3e-02	1.3e+01	5.1098	0.587107	3	0.09375
DNAm Plasminogen activator inhibitor 1	GO Biological Process	GO:0070228	regulation of lymphocyte apoptotic process	35	0.0120846	1.2e-03	1.9e-02	3.6e-01	6.43821	0.776613	5	0.00368063	0.0236967	58	3.7e-03	2.7e-02	6.1e+00	6.22909	0.642148	4	0.114286
DNAm Plasminogen activator inhibitor 1	GO Biological Process	GO:0035567	non-canonical Wnt receptor signaling pathway	27	0.0120846	1.3e-03	1.9e-02	4.0e-01	6.30271	0.79331	5	0.00375976	0.0236967	26	1.4e-03	2.2e-02	6.0e+01	8.07475	0.495372	4	0.148148
DNAm Plasminogen activator inhibitor 1	GO Biological Process	GO:0002820	negative regulation of adaptive immune response	20	0.0060423	1.6e-03	1.9e-02	4.7e-01	8.22223	0.486486	4	0.00230562	0.0189574	498	5.1e-02	8.2e-02	3.6e+01	5.45045	0.366942	2	0.1
DNAm Plasminogen activator inhibitor 1	GO Biological Process	GO:0032374	regulation of cholesterol transport	32	0.00906344	1.6e-03	1.9e-02	4.8e-01	8.1916	0.488305	4	0.00231424	0.0189574	247	2.0e-02	5.3e-02	3.9e+01	5.1098	0.587107	3	0.09375
DNAm Plasminogen activator inhibitor 1	GO Biological Process	GO:0032376	positive regulation of cholesterol transport	13	0.0060423	1.6e-03	1.9e-02	4.9e-01	13.2363	0.226649	3	0.00107417	0.014218	266	2.3e-02	5.5e-02	3.7e+01	8.38531	0.238512	2	0.153846
DNAm Plasminogen activator inhibitor 1	GO Biological Process	GO:0046321	positive regulation of fatty acid oxidation	12	0.00906344	1.6e-03	1.9e-02	5.0e-01	8.08592	0.494687	4	0.00234449	0.0189574	22	1.2e-03	2.2e-02	1.8e+01	13.6261	0.220165	3	0.25
DNAm Plasminogen activator inhibitor 1	GO Biological Process	GO:0045923	positive regulation of fatty acid metabolic process	27	0.0120846	1.7e-03	1.9e-02	5.1e-01	5.96458	0.838281	5	0.0039729	0.0236967	26	1.4e-03	2.2e-02	1.5e+01	8.07475	0.495372	4	0.148148
DNAm Plasminogen activator inhibitor 1	GO Biological Process	GO:0032787	monocarboxylic acid metabolic process	416	0.0483384	1.7e-03	1.9e-02	5.1e-01	2.25163	7.55008	17	0.0357824	0.0805687	69	4.5e-03	2.8e-02	4.3e+01	2.09633	7.63239	16	0.0384615
DNAm Plasminogen activator inhibitor 1	GO Biological Process	GO:1902106	negative regulation of leukocyte differentiation	68	0.0120846	1.8e-03	1.9e-02	5.4e-01	4.11092	1.70278	7	0.00807005	0.0331754	341	3.6e-02	6.9e-02	4.8e+00	3.20615	1.2476	4	0.0588235
DNAm Plasminogen activator inhibitor 1	GO Biological Process	GO:0008585	female gonad development	88	0.0271903	1.8e-03	1.9e-02	5.4e-01	3.32457	2.70712	9	0.0128299	0.042654	2	3.4e-05	3.5e-03	5.7e+00	5.57433	1.61454	9	0.102273
DNAm Plasminogen activator inhibitor 1	GO Biological Process	GO:0006595	polyamine metabolic process	20	0.00906344	1.8e-03	1.9e-02	5.5e-01	12.7088	0.236057	3	0.00111875	0.014218	80	5.5e-03	3.2e-02	2.8e-01	8.17568	0.366942	3	0.15
DNAm Plasminogen activator inhibitor 1	GO Biological Process	GO:0031670	cellular response to nutrient	19	0.00906344	1.8e-03	1.9e-02	5.6e-01	7.84809	0.509678	4	0.00241553	0.0189574	71	4.8e-03	2.9e-02	1.1e+02	8.60598	0.348595	3	0.157895
DNAm Plasminogen activator inhibitor 1	GO Biological Process	GO:0015697	quaternary ammonium group transport	18	0.0060423	1.8e-03	1.9e-02	5.6e-01	12.6444	0.23726	3	0.00112445	0.014218	447	4.2e-02	7.4e-02	2.8e+01	6.05606	0.330248	2	0.111111
DNAm Plasminogen activator inhibitor 1	GO Biological Process	GO:0050777	negative regulation of immune response	60	0.00906344	2.0e-03	2.0e-02	6.0e-01	4.68076	1.28184	6	0.00607509	0.028436	880	9.8e-02	1.2e-01	3.5e+01	2.72523	1.10083	3	0.05
DNAm Plasminogen activator inhibitor 1	GO Biological Process	GO:0044255	cellular lipid metabolic process	821	0.081571	2.3e-03	2.1e-02	7.0e-01	1.79879	15.0101	27	0.0711379	0.127962	44	2.5e-03	2.5e-02	8.0e+00	1.79248	15.063	27	0.0328867
DNAm Plasminogen activator inhibitor 1	GO Biological Process	GO:0010888	negative regulation of lipid storage	16	0.0060423	2.5e-03	2.1e-02	7.7e-01	11.2767	0.266034	3	0.00126082	0.014218	331	3.4e-02	6.7e-02	3.3e+01	6.81307	0.293554	2	0.125
DNAm Plasminogen activator inhibitor 1	GO Biological Process	GO:0035024	negative regulation of Rho protein signal transduction	10	0.0060423	2.7e-03	2.1e-02	8.1e-01	11.0801	0.270755	3	0.0012832	0.014218	134	1.4e-02	4.9e-02	6.0e+01	10.9009	0.183471	2	0.2
DNAm Plasminogen activator inhibitor 1	GO Biological Process	GO:0090278	negative regulation of peptide hormone secretion	32	0.0120846	2.7e-03	2.1e-02	8.3e-01	5.31695	0.940389	5	0.00445682	0.0236967	46	2.7e-03	2.5e-02	6.9e+01	6.81307	0.587107	4	0.125
DNAm Plasminogen activator inhibitor 1	GO Biological Process	GO:0034695	response to prostaglandin E stimulus	14	0.0060423	2.8e-03	2.1e-02	8.5e-01	10.8748	0.275868	3	0.00130743	0.014218	289	2.6e-02	5.8e-02	1.8e+01	7.78636	0.256859	2	0.142857
DNAm Plasminogen activator inhibitor 1	GO Biological Process	GO:0002792	negative regulation of peptide secretion	33	0.0120846	2.8e-03	2.1e-02	8.6e-01	5.27969	0.947026	5	0.00448827	0.0236967	48	3.0e-03	2.6e-02	3.9e+01	6.60661	0.605454	4	0.121212
DNAm Plasminogen activator inhibitor 1	GO Biological Process	GO:0046545	development of primary female sexual characteristics	105	0.0302115	2.9e-03	2.1e-02	8.8e-01	2.87477	3.47854	10	0.016486	0.0473934	1	2.3e-05	3.5e-03	1.4e+01	5.19091	1.92644	10	0.0952381
DNAm Plasminogen activator inhibitor 1	GO Biological Process	GO:0006301	postreplication repair	17	0.00906344	2.9e-03	2.1e-02	8.8e-01	10.7538	0.27897	3	0.00132213	0.014218	55	3.4e-03	2.7e-02	2.0e+01	9.61845	0.311901	3	0.176471
DNAm Plasminogen activator inhibitor 1	GO Biological Process	GO:0002376	immune system process	1789	0.138973	3.0e-03	2.1e-02	9.1e-01	1.48071	32.417	48	0.153635	0.227488	124	1.2e-02	4.8e-02	4.1e+01	1.40146	32.823	46	0.0257127
DNAm Plasminogen activator inhibitor 1	GO Biological Process	GO:0016042	lipid catabolic process	222	0.0271903	3.0e-03	2.1e-02	9.2e-01	2.85645	3.50084	10	0.0165917	0.0473934	260	2.2e-02	5.5e-02	2.3e+01	2.20964	4.07306	9	0.0405405
DNAm Plasminogen activator inhibitor 1	GO Biological Process	GO:0046888	negative regulation of hormone secretion	53	0.0151057	3.1e-03	2.1e-02	9.3e-01	4.28767	1.39936	6	0.00663205	0.028436	47	2.8e-03	2.6e-02	5.1e+01	5.14194	0.972396	5	0.0943396
DNAm Plasminogen activator inhibitor 1	GO Biological Process	GO:0007631	feeding behavior	82	0.021148	3.1e-03	2.1e-02	9.3e-01	3.34067	2.39473	8	0.0113494	0.0379147	13	7.7e-04	1.9e-02	2.0e+01	4.65283	1.50446	7	0.0853658
DNAm Plasminogen activator inhibitor 1	GO Biological Process	GO:0046660	female sex differentiation	110	0.0302115	3.2e-03	2.1e-02	9.6e-01	2.83974	3.52145	10	0.0166893	0.0473934	3	3.5e-05	3.5e-03	9.4e+01	4.95496	2.01818	10	0.0909091
DNAm Plasminogen activator inhibitor 1	GO Biological Process	GO:0046580	negative regulation of Ras protein signal transduction	35	0.0120846	3.2e-03	2.1e-02	9.7e-01	5.12936	0.974781	5	0.00461981	0.0236967	58	3.7e-03	2.7e-02	8.2e+01	6.22909	0.642148	4	0.114286
DNAm Plasminogen activator inhibitor 1	GO Biological Process	GO:0010743	regulation of macrophage derived foam cell differentiation	28	0.00906344	3.3e-03	2.1e-02	9.9e-01	6.68881	0.598014	4	0.00283419	0.0189574	138	1.4e-02	5.0e-02	1.9e+01	5.83977	0.513719	3	0.107143
DNAm Plasminogen activator inhibitor 1	GO Biological Process	GO:0010893	positive regulation of steroid biosynthetic process	12	0.0060423	3.3e-03	2.1e-02	9.9e-01	10.2963	0.291366	3	0.00138088	0.014218	240	2.0e-02	5.3e-02	1.1e+02	9.08409	0.220165	2	0.166667
DNAm Plasminogen activator inhibitor 1	GO Biological Process	GO:0033700	phospholipid efflux	10	0.00302115	3.3e-03	2.1e-02	9.9e-01	23.9565	0.0834847	2	0.000395662	0.00947867	1362	1.7e-01	1.9e-01	5.1e+01	5.45045	0.183471	1	0.1
DNAm Plasminogen activator inhibitor 1	GO Biological Process	GO:0060071	Wnt receptor signaling pathway, planar cell polarity pathway	21	0.00906344	3.3e-03	2.1e-02	1.0e+00	6.65957	0.600639	4	0.00284663	0.0189574	85	6.4e-03	3.5e-02	1.4e+02	7.78636	0.385289	3	0.142857
DNAm Plasminogen activator inhibitor 1	GO Biological Process	GO:0006629	lipid metabolic process	1064	0.0996979	3.5e-03	2.1e-02	1.1e+00	1.64956	19.3992	32	0.0919392	0.151659	38	2.3e-03	2.5e-02	6.5e+01	1.69046	19.5213	33	0.031015
DNAm Plasminogen activator inhibitor 1	GO Biological Process	GO:0000245	spliceosomal complex assembly	45	0.00906344	3.5e-03	2.1e-02	1.1e+00	5.01777	0.996458	5	0.00472255	0.0236967	486	4.9e-02	8.0e-02	6.0e+01	3.63363	0.825619	3	0.0666667
DNAm Plasminogen activator inhibitor 1	GO Biological Process	GO:0051641	cellular localization	1733	0.132931	3.5e-03	2.1e-02	1.1e+00	1.46885	32.6786	48	0.154875	0.227488	164	1.7e-02	5.0e-02	9.3e+00	1.38384	31.7955	44	0.0253895
DNAm Plasminogen activator inhibitor 1	GO Biological Process	GO:0015850	organic hydroxy compound transport	90	0.0120846	4.0e-03	2.1e-02	1.2e+00	4.05257	1.48054	6	0.00701679	0.028436	772	8.4e-02	1.1e-01	1.4e+02	2.42242	1.65124	4	0.0444444
DNAm Plasminogen activator inhibitor 1	GO Biological Process	GO:0051894	positive regulation of focal adhesion assembly	13	0.0060423	4.0e-03	2.1e-02	1.2e+00	9.56253	0.313725	3	0.00148685	0.014218	266	2.3e-02	5.5e-02	2.8e+01	8.38531	0.238512	2	0.153846
DNAm Plasminogen activator inhibitor 1	GO Biological Process	GO:0006952	defense response	1231	0.0936556	4.1e-03	2.1e-02	1.2e+00	1.61723	20.4052	33	0.0967071	0.156398	464	4.6e-02	7.7e-02	1.4e+02	1.37258	22.5853	31	0.0251828
DNAm Plasminogen activator inhibitor 1	GO Biological Process	GO:0045619	regulation of lymphocyte differentiation	115	0.0181269	4.1e-03	2.1e-02	1.2e+00	3.18389	2.51265	8	0.0119083	0.0379147	238	1.9e-02	5.3e-02	1.4e+02	2.84371	2.10992	6	0.0521739
DNAm Plasminogen activator inhibitor 1	GO Biological Process	GO:0060397	JAK-STAT cascade involved in growth hormone signaling pathway	25	0.0120846	4.2e-03	2.1e-02	1.3e+00	6.20569	0.64457	4	0.00305483	0.0189574	19	1.0e-03	2.2e-02	1.6e+02	8.72072	0.458678	4	0.16
DNAm Plasminogen activator inhibitor 1	GO Biological Process	GO:0019221	cytokine-mediated signaling pathway	321	0.0362538	4.3e-03	2.1e-02	1.3e+00	2.43773	4.92261	12	0.0233299	0.056872	149	1.6e-02	5.0e-02	5.4e+01	2.03755	5.88942	12	0.0373832
DNAm Plasminogen activator inhibitor 1	GO Biological Process	GO:0032370	positive regulation of lipid transport	33	0.00906344	4.4e-03	2.1e-02	1.3e+00	6.1422	0.651232	4	0.00308641	0.0189574	262	2.2e-02	5.5e-02	6.5e+01	4.95496	0.605454	3	0.0909091
DNAm Plasminogen activator inhibitor 1	GO Biological Process	GO:0046320	regulation of fatty acid oxidation	22	0.00906344	4.4e-03	2.1e-02	1.3e+00	6.14174	0.651281	4	0.00308664	0.0189574	93	7.3e-03	3.7e-02	1.1e+02	7.43244	0.403636	3	0.136364
DNAm Plasminogen activator inhibitor 1	GO Biological Process	GO:0051649	establishment of localization in cell	1478	0.108761	4.4e-03	2.1e-02	1.3e+00	1.51254	27.1067	41	0.128468	0.194313	485	4.9e-02	8.0e-02	8.6e+01	1.32758	27.117	36	0.0243572
DNAm Plasminogen activator inhibitor 1	GO Biological Process	GO:0002762	negative regulation of myeloid leukocyte differentiation	36	0.00906344	4.4e-03	2.1e-02	1.3e+00	4.74085	1.05466	5	0.00499841	0.0236967	296	2.8e-02	6.1e-02	1.4e+01	4.54204	0.660496	3	0.0833333
DNAm Plasminogen activator inhibitor 1	GO Biological Process	GO:0003333	amino acid transmembrane transport	35	0.00906344	4.5e-03	2.1e-02	1.4e+00	6.11149	0.654505	4	0.00310192	0.0189574	285	2.6e-02	5.8e-02	5.1e+01	4.67182	0.642148	3	0.0857143
DNAm Plasminogen activator inhibitor 1	GO Biological Process	GO:0030258	lipid modification	123	0.021148	4.6e-03	2.1e-02	1.4e+00	3.12826	2.55733	8	0.0121201	0.0379147	96	7.6e-03	3.8e-02	6.5e+01	3.10188	2.25669	7	0.0569106
DNAm Plasminogen activator inhibitor 1	GO Biological Process	GO:2000106	regulation of leukocyte apoptotic process	58	0.0151057	4.6e-03	2.1e-02	1.4e+00	3.94701	1.52014	6	0.00720445	0.028436	67	4.2e-03	2.7e-02	8.2e+01	4.69867	1.06413	5	0.0862069
DNAm Plasminogen activator inhibitor 1	GO Biological Process	GO:0032318	regulation of Ras GTPase activity	234	0.0332326	4.6e-03	2.1e-02	1.4e+00	2.2342	6.26624	14	0.0296978	0.0663507	65	4.1e-03	2.7e-02	8.2e+01	2.56218	4.29322	11	0.0470086
DNAm Plasminogen activator inhibitor 1	GO Biological Process	GO:0002706	regulation of lymphocyte mediated immunity	94	0.0120846	4.6e-03	2.1e-02	1.4e+00	3.94379	1.52138	6	0.00721033	0.028436	871	9.5e-02	1.2e-01	6.9e+01	2.31934	1.72463	4	0.0425532
DNAm Plasminogen activator inhibitor 1	GO Biological Process	GO:0010874	regulation of cholesterol efflux	17	0.0060423	4.7e-03	2.1e-02	1.4e+00	9.03895	0.331897	3	0.00157297	0.014218	421	3.8e-02	7.2e-02	5.1e+01	6.4123	0.311901	2	0.117647
DNAm Plasminogen activator inhibitor 1	GO Biological Process	GO:0032320	positive regulation of Ras GTPase activity	173	0.0271903	4.7e-03	2.1e-02	1.4e+00	2.52946	4.34875	11	0.0206102	0.0521327	70	4.7e-03	2.9e-02	4.1e+01	2.8355	3.17405	9	0.0520231
DNAm Plasminogen activator inhibitor 1	GO Biological Process	GO:0045671	negative regulation of osteoclast differentiation	19	0.0060423	4.9e-03	2.1e-02	1.5e+00	5.96087	0.671043	4	0.0031803	0.0189574	467	4.7e-02	7.7e-02	2.2e+01	5.73732	0.348595	2	0.105263
DNAm Plasminogen activator inhibitor 1	GO Biological Process	GO:0009062	fatty acid catabolic process	63	0.0120846	4.9e-03	2.1e-02	1.5e+00	4.62794	1.08039	5	0.00512035	0.0236967	304	2.8e-02	6.1e-02	3.5e+01	3.46061	1.15587	4	0.0634921
DNAm Plasminogen activator inhibitor 1	GO Biological Process	GO:0042987	amyloid precursor protein catabolic process	11	0.00302115	5.2e-03	2.2e-02	1.6e+00	18.9279	0.105664	2	0.000500778	0.00947867	1449	1.8e-01	2.0e-01	6.9e+01	4.95496	0.201818	1	0.0909091
DNAm Plasminogen activator inhibitor 1	GO Biological Process	GO:0060026	convergent extension	17	0.0060423	5.3e-03	2.2e-02	1.6e+00	8.66655	0.346158	3	0.00164056	0.014218	421	3.8e-02	7.2e-02	1.1e+02	6.4123	0.311901	2	0.117647
DNAm Plasminogen activator inhibitor 1	GO Biological Process	GO:0034694	response to prostaglandin stimulus	19	0.0060423	5.3e-03	2.2e-02	1.6e+00	8.65646	0.346562	3	0.00164247	0.014218	467	4.7e-02	7.7e-02	5.1e+01	5.73732	0.348595	2	0.105263
DNAm Plasminogen activator inhibitor 1	GO Biological Process	GO:0043647	inositol phosphate metabolic process	55	0.0120846	5.4e-03	2.2e-02	1.6e+00	4.52591	1.10475	5	0.00523578	0.0236967	172	1.8e-02	5.3e-02	7.8e+01	3.96397	1.00909	4	0.0727273
DNAm Plasminogen activator inhibitor 1	GO Biological Process	GO:0006376	mRNA splice site selection	24	0.0060423	5.6e-03	2.3e-02	1.7e+00	5.73358	0.697644	4	0.00330637	0.0189574	649	7.1e-02	1.0e-01	6.9e+01	4.54204	0.44033	2	0.0833333
DNAm Plasminogen activator inhibitor 1	GO Biological Process	GO:0051058	negative regulation of small GTPase mediated signal transduction	36	0.0120846	5.7e-03	2.3e-02	1.7e+00	4.45528	1.12226	5	0.00531878	0.0236967	66	4.1e-03	2.7e-02	1.2e+02	6.05606	0.660496	4	0.111111
DNAm Plasminogen activator inhibitor 1	GO Biological Process	GO:0019395	fatty acid oxidation	63	0.0120846	5.8e-03	2.3e-02	1.7e+00	4.45175	1.12315	5	0.005323	0.0236967	304	2.8e-02	6.1e-02	7.1e+01	3.46061	1.15587	4	0.0634921
DNAm Plasminogen activator inhibitor 1	GO Biological Process	GO:0001817	regulation of cytokine production	437	0.0392749	5.9e-03	2.3e-02	1.8e+00	2.04004	7.84298	16	0.0371705	0.0758294	600	6.1e-02	9.0e-02	6.2e+01	1.62142	8.01768	13	0.0297483
DNAm Plasminogen activator inhibitor 1	GO Biological Process	GO:0034440	lipid oxidation	64	0.0120846	5.9e-03	2.3e-02	1.8e+00	4.42293	1.13047	5	0.00535769	0.0236967	311	3.0e-02	6.2e-02	7.8e+01	3.40653	1.17421	4	0.0625
DNAm Plasminogen activator inhibitor 1	GO Biological Process	GO:0006469	negative regulation of protein kinase activity	174	0.021148	6.2e-03	2.3e-02	1.9e+00	2.57392	3.88513	10	0.0184129	0.0473934	444	4.2e-02	7.4e-02	6.0e+01	2.19271	3.19239	7	0.0402299
DNAm Plasminogen activator inhibitor 1	GO Biological Process	GO:0006661	phosphatidylinositol biosynthetic process	90	0.0151057	6.2e-03	2.3e-02	1.9e+00	3.70005	1.6216	6	0.0076853	0.028436	278	2.5e-02	5.8e-02	6.0e+01	3.02803	1.65124	5	0.0555556
DNAm Plasminogen activator inhibitor 1	GO Biological Process	GO:0007259	JAK-STAT cascade	49	0.0151057	6.3e-03	2.3e-02	1.9e+00	4.35547	1.14798	5	0.00544067	0.0236967	36	2.0e-03	2.4e-02	3.1e+00	5.56169	0.899008	5	0.102041
DNAm Plasminogen activator inhibitor 1	GO Biological Process	GO:0010565	regulation of cellular ketone metabolic process	160	0.0241692	6.3e-03	2.3e-02	1.9e+00	2.73525	3.29037	9	0.0155942	0.042654	108	9.5e-03	4.3e-02	1.2e+02	2.72523	2.93554	8	0.05
DNAm Plasminogen activator inhibitor 1	GO Biological Process	GO:0006635	fatty acid beta-oxidation	45	0.00906344	6.4e-03	2.3e-02	1.9e+00	5.50351	0.726809	4	0.00344459	0.0189574	486	4.9e-02	8.0e-02	6.5e+01	3.63363	0.825619	3	0.0666667
DNAm Plasminogen activator inhibitor 1	GO Biological Process	GO:0030262	apoptotic nuclear changes	43	0.00906344	6.5e-03	2.3e-02	2.0e+00	5.48532	0.72922	4	0.00345602	0.0189574	459	4.4e-02	7.6e-02	7.4e+01	3.80264	0.788925	3	0.0697674
DNAm Plasminogen activator inhibitor 1	GO Biological Process	GO:0044242	cellular lipid catabolic process	125	0.0181269	6.5e-03	2.3e-02	2.0e+00	3.23588	2.16325	7	0.0102524	0.0331754	295	2.8e-02	6.1e-02	6.5e+01	2.61622	2.29339	6	0.048
DNAm Plasminogen activator inhibitor 1	GO Biological Process	GO:0046850	regulation of bone remodeling	36	0.00906344	6.6e-03	2.3e-02	2.0e+00	4.31273	1.15936	5	0.00549459	0.0236967	296	2.8e-02	6.1e-02	6.9e+01	4.54204	0.660496	3	0.0833333
DNAm Plasminogen activator inhibitor 1	GO Biological Process	GO:0050866	negative regulation of cell activation	121	0.0151057	6.6e-03	2.3e-02	2.0e+00	2.93204	2.72848	8	0.0129312	0.0379147	718	7.2e-02	1.0e-01	9.0e+01	2.25225	2.22	5	0.0413223
DNAm Plasminogen activator inhibitor 1	GO Biological Process	GO:0006913	nucleocytoplasmic transport	217	0.0271903	7.0e-03	2.4e-02	2.1e+00	2.52827	3.95528	10	0.0187454	0.0473934	236	1.9e-02	5.3e-02	6.0e+01	2.26056	3.98132	9	0.0414747
DNAm Plasminogen activator inhibitor 1	GO Biological Process	GO:0033280	response to vitamin D	16	0.0060423	7.1e-03	2.4e-02	2.1e+00	7.79752	0.384738	3	0.0018234	0.014218	331	3.4e-02	6.7e-02	6.3e+01	6.81307	0.293554	2	0.125
DNAm Plasminogen activator inhibitor 1	GO Biological Process	GO:0001819	positive regulation of cytokine production	248	0.0302115	7.2e-03	2.4e-02	2.2e+00	2.38834	4.60572	11	0.021828	0.0521327	162	1.7e-02	5.0e-02	5.1e+01	2.19776	4.55008	10	0.0403226
DNAm Plasminogen activator inhibitor 1	GO Biological Process	GO:0071345	cellular response to cytokine stimulus	435	0.0422961	7.3e-03	2.4e-02	2.2e+00	2.05035	7.31581	15	0.0346721	0.0710901	315	3.1e-02	6.3e-02	4.0e+01	1.75417	7.98099	14	0.0321839
DNAm Plasminogen activator inhibitor 1	GO Biological Process	GO:0022613	ribonucleoprotein complex biogenesis	261	0.0241692	7.3e-03	2.4e-02	2.2e+00	2.51274	3.97972	10	0.0188612	0.0473934	984	1.1e-01	1.3e-01	1.1e+01	1.67064	4.78859	8	0.0306513
DNAm Plasminogen activator inhibitor 1	GO Biological Process	GO:0051048	negative regulation of secretion	134	0.021148	7.5e-03	2.4e-02	2.3e+00	2.66136	3.38173	9	0.0160272	0.042654	125	1.2e-02	4.8e-02	2.5e+01	2.84725	2.45851	7	0.0522388
DNAm Plasminogen activator inhibitor 1	GO Biological Process	GO:0006596	polyamine biosynthetic process	11	0.0060423	7.5e-03	2.4e-02	2.3e+00	15.5959	0.128239	2	0.000607767	0.00947867	154	1.7e-02	5.0e-02	9.8e+01	9.90991	0.201818	2	0.181818
DNAm Plasminogen activator inhibitor 1	GO Biological Process	GO:0048878	chemical homeostasis	659	0.0634441	7.7e-03	2.4e-02	2.3e+00	1.70507	14.0757	24	0.0667095	0.113744	110	1.0e-02	4.6e-02	9.8e+01	1.73687	12.0907	21	0.0318665
DNAm Plasminogen activator inhibitor 1	GO Biological Process	GO:0009437	carnitine metabolic process	10	0.00302115	8.1e-03	2.5e-02	2.5e+00	14.9782	0.133527	2	0.00063283	0.00947867	1362	1.7e-01	1.9e-01	5.1e+01	5.45045	0.183471	1	0.1
DNAm Plasminogen activator inhibitor 1	GO Biological Process	GO:0051258	protein polymerization	60	0.0151057	8.2e-03	2.5e-02	2.5e+00	4.08353	1.22443	5	0.00580299	0.0236967	74	4.8e-03	2.9e-02	1.2e+02	4.54204	1.10083	5	0.0833333
DNAm Plasminogen activator inhibitor 1	GO Biological Process	GO:0046626	regulation of insulin receptor signaling pathway	32	0.00906344	8.3e-03	2.5e-02	2.5e+00	5.11403	0.782162	4	0.00370693	0.0189574	247	2.0e-02	5.3e-02	3.0e+01	5.1098	0.587107	3	0.09375
DNAm Plasminogen activator inhibitor 1	GO Biological Process	GO:0045321	leukocyte activation	352	0.0453172	8.4e-03	2.5e-02	2.5e+00	1.96251	8.15282	16	0.038639	0.0758294	39	2.3e-03	2.5e-02	5.2e+01	2.32264	6.45818	15	0.0426136
DNAm Plasminogen activator inhibitor 1	GO Biological Process	GO:0045620	negative regulation of lymphocyte differentiation	32	0.0060423	8.5e-03	2.5e-02	2.6e+00	5.07994	0.787411	4	0.0037318	0.0189574	1016	1.2e-01	1.4e-01	6.9e+01	3.40653	0.587107	2	0.0625
DNAm Plasminogen activator inhibitor 1	GO Biological Process	GO:0032663	regulation of interleukin-2 production	42	0.00906344	8.5e-03	2.5e-02	2.6e+00	4.04254	1.23685	5	0.00586183	0.0236967	439	4.2e-02	7.4e-02	1.5e+01	3.89318	0.770578	3	0.0714286
DNAm Plasminogen activator inhibitor 1	GO Biological Process	GO:0050869	negative regulation of B cell activation	27	0.0060423	8.6e-03	2.5e-02	2.6e+00	5.0524	0.791702	4	0.00375215	0.0189574	782	8.7e-02	1.1e-01	3.0e+00	4.03737	0.495372	2	0.0740741
DNAm Plasminogen activator inhibitor 1	GO Biological Process	GO:0051169	nuclear transport	222	0.0271903	8.8e-03	2.6e-02	2.7e+00	2.43847	4.10094	10	0.0194357	0.0473934	260	2.2e-02	5.5e-02	5.1e+01	2.20964	4.07306	9	0.0405405
DNAm Plasminogen activator inhibitor 1	GO Biological Process	GO:0051329	mitotic interphase	22	0.00906344	8.9e-03	2.6e-02	2.7e+00	7.16564	0.418665	3	0.00198419	0.014218	93	7.3e-03	3.7e-02	5.1e+01	7.43244	0.403636	3	0.136364
DNAm Plasminogen activator inhibitor 1	GO Biological Process	GO:2000107	negative regulation of leukocyte apoptotic process	33	0.00906344	9.1e-03	2.6e-02	2.7e+00	4.97794	0.803545	4	0.00380827	0.0189574	262	2.2e-02	5.5e-02	1.7e+02	4.95496	0.605454	3	0.0909091
DNAm Plasminogen activator inhibitor 1	GO Biological Process	GO:0046649	lymphocyte activation	288	0.0392749	9.4e-03	2.6e-02	2.8e+00	2.04889	6.83298	14	0.0323838	0.0663507	45	2.7e-03	2.5e-02	7.8e+01	2.46027	5.28396	13	0.0451389
DNAm Plasminogen activator inhibitor 1	GO Biological Process	GO:0031998	regulation of fatty acid beta-oxidation	14	0.0060423	9.4e-03	2.6e-02	2.9e+00	7.00617	0.428194	3	0.00202936	0.014218	289	2.6e-02	5.8e-02	2.6e+01	7.78636	0.256859	2	0.142857
DNAm Plasminogen activator inhibitor 1	GO Biological Process	GO:0045940	positive regulation of steroid metabolic process	21	0.0060423	9.4e-03	2.6e-02	2.9e+00	7.00405	0.428324	3	0.00202997	0.014218	581	5.6e-02	8.7e-02	1.0e+01	5.19091	0.385289	2	0.0952381
DNAm Plasminogen activator inhibitor 1	GO Biological Process	GO:0060218	hematopoietic stem cell differentiation	10	0.00302115	9.6e-03	2.6e-02	2.9e+00	13.7062	0.145919	2	0.00069156	0.00947867	1362	1.7e-01	1.9e-01	5.1e+01	5.45045	0.183471	1	0.1
DNAm Plasminogen activator inhibitor 1	GO Biological Process	GO:0033673	negative regulation of kinase activity	184	0.021148	9.6e-03	2.6e-02	2.9e+00	2.40695	4.15464	10	0.0196902	0.0473934	509	5.4e-02	8.4e-02	5.1e+01	2.07354	3.37587	7	0.0380435
DNAm Plasminogen activator inhibitor 1	GO Biological Process	GO:0051168	nuclear export	102	0.0151057	9.6e-03	2.6e-02	2.9e+00	3.9193	1.27574	5	0.00604615	0.0236967	434	4.0e-02	7.3e-02	9.0e+01	2.67179	1.8714	5	0.0490196
DNAm Plasminogen activator inhibitor 1	GO Biological Process	GO:0006309	apoptotic DNA fragmentation	27	0.0060423	9.7e-03	2.6e-02	2.9e+00	6.92814	0.433016	3	0.00205221	0.014218	782	8.7e-02	1.1e-01	1.3e+02	4.03737	0.495372	2	0.0740741
DNAm Plasminogen activator inhibitor 1	GO Biological Process	GO:0060396	growth hormone receptor signaling pathway	28	0.0120846	9.9e-03	2.6e-02	3.0e+00	4.84833	0.825026	4	0.00391008	0.0189574	31	1.6e-03	2.2e-02	6.3e+01	7.78636	0.513719	4	0.142857
DNAm Plasminogen activator inhibitor 1	GO Biological Process	GO:0031347	regulation of defense response	466	0.0392749	9.9e-03	2.6e-02	3.0e+00	1.92501	8.31164	16	0.0393917	0.0758294	853	8.9e-02	1.2e-01	1.2e+02	1.52051	8.54975	13	0.027897
DNAm Plasminogen activator inhibitor 1	GO Biological Process	GO:0071378	cellular response to growth hormone stimulus	29	0.0120846	1.0e-02	2.6e-02	3.1e+00	4.82017	0.829846	4	0.00393292	0.0189574	33	1.8e-03	2.3e-02	1.1e+02	7.51787	0.532066	4	0.137931
DNAm Plasminogen activator inhibitor 1	GO Biological Process	GO:0006955	immune response	1110	0.0845922	1.1e-02	2.7e-02	3.2e+00	1.56849	18.4891	29	0.0876263	0.137441	574	5.5e-02	8.5e-02	9.8e+01	1.37489	20.3653	28	0.0252252
DNAm Plasminogen activator inhibitor 1	GO Biological Process	GO:0046676	negative regulation of insulin secretion	28	0.00906344	1.1e-02	2.7e-02	3.3e+00	4.73275	0.845175	4	0.00400557	0.0189574	138	1.4e-02	5.0e-02	1.3e+02	5.83977	0.513719	3	0.107143
DNAm Plasminogen activator inhibitor 1	GO Biological Process	GO:0051205	protein insertion into membrane	12	0.00302115	1.1e-02	2.7e-02	3.4e+00	12.6316	0.158333	2	0.000750396	0.00947867	1530	2.0e-01	2.1e-01	9.8e+01	4.54204	0.220165	1	0.0833333
DNAm Plasminogen activator inhibitor 1	GO Biological Process	GO:0002791	regulation of peptide secretion	168	0.0271903	1.1e-02	2.7e-02	3.4e+00	2.23793	4.91526	11	0.0232951	0.0521327	62	3.9e-03	2.7e-02	5.6e+01	2.91989	3.08231	9	0.0535714
DNAm Plasminogen activator inhibitor 1	GO Biological Process	GO:0009205	purine ribonucleoside triphosphate metabolic process	437	0.0392749	1.1e-02	2.7e-02	3.4e+00	2.00239	6.99164	14	0.0331357	0.0663507	600	6.1e-02	9.0e-02	8.7e+01	1.62142	8.01768	13	0.0297483
DNAm Plasminogen activator inhibitor 1	GO Biological Process	GO:0046890	regulation of lipid biosynthetic process	105	0.0181269	1.1e-02	2.7e-02	3.4e+00	2.90362	2.41078	7	0.0114255	0.0331754	126	1.3e-02	4.9e-02	5.1e+01	3.11455	1.92644	6	0.0571429
DNAm Plasminogen activator inhibitor 1	GO Biological Process	GO:0090087	regulation of peptide transport	170	0.0271903	1.2e-02	2.7e-02	3.5e+00	2.22931	4.93427	11	0.0233852	0.0521327	68	4.2e-03	2.7e-02	6.4e+01	2.88553	3.11901	9	0.0529412
DNAm Plasminogen activator inhibitor 1	GO Biological Process	GO:0034375	high-density lipoprotein particle remodeling	14	0.00302115	1.2e-02	2.7e-02	3.5e+00	12.4125	0.161128	2	0.00076364	0.00947867	1698	2.3e-01	2.4e-01	9.0e+01	3.89318	0.256859	1	0.0714286
DNAm Plasminogen activator inhibitor 1	GO Biological Process	GO:0070542	response to fatty acid	42	0.00906344	1.2e-02	2.7e-02	3.5e+00	4.61981	0.865837	4	0.00410349	0.0189574	439	4.2e-02	7.4e-02	7.5e+01	3.89318	0.770578	3	0.0714286
DNAm Plasminogen activator inhibitor 1	GO Biological Process	GO:0043434	response to peptide hormone stimulus	351	0.0392749	1.2e-02	2.7e-02	3.6e+00	1.99186	7.02861	14	0.0333109	0.0663507	129	1.3e-02	4.9e-02	6.5e+01	2.01869	6.43983	13	0.037037
DNAm Plasminogen activator inhibitor 1	GO Biological Process	GO:0042982	amyloid precursor protein metabolic process	15	0.00302115	1.2e-02	2.7e-02	3.6e+00	12.2598	0.163135	2	0.000773152	0.00947867	1773	2.4e-01	2.5e-01	1.2e+02	3.63363	0.275207	1	0.0666667
DNAm Plasminogen activator inhibitor 1	GO Biological Process	GO:1900076	regulation of cellular response to insulin stimulus	41	0.00906344	1.2e-02	2.7e-02	3.6e+00	4.5861	0.872201	4	0.00413366	0.0189574	429	3.9e-02	7.3e-02	6.5e+01	3.98814	0.752231	3	0.0731707
DNAm Plasminogen activator inhibitor 1	GO Biological Process	GO:0032368	regulation of lipid transport	68	0.0120846	1.2e-02	2.7e-02	3.6e+00	3.7071	1.34876	5	0.00639224	0.0236967	341	3.6e-02	6.9e-02	7.4e+01	3.20615	1.2476	4	0.0588235
DNAm Plasminogen activator inhibitor 1	GO Biological Process	GO:0016266	O-glycan processing	55	0.0120846	1.2e-02	2.7e-02	3.7e+00	3.69773	1.35218	5	0.00640845	0.0236967	172	1.8e-02	5.3e-02	5.6e+01	3.96397	1.00909	4	0.0727273
DNAm Plasminogen activator inhibitor 1	GO Biological Process	GO:0002703	regulation of leukocyte mediated immunity	117	0.0120846	1.2e-02	2.7e-02	3.7e+00	3.19229	1.87953	6	0.00890772	0.028436	1360	1.7e-01	1.9e-01	8.2e+01	1.8634	2.14661	4	0.034188
DNAm Plasminogen activator inhibitor 1	GO Biological Process	GO:0048025	negative regulation of mRNA splicing, via spliceosome	15	0.00302115	1.2e-02	2.7e-02	3.7e+00	12.0145	0.166466	2	0.000788939	0.00947867	1773	2.4e-01	2.5e-01	3.5e+01	3.63363	0.275207	1	0.0666667
DNAm Plasminogen activator inhibitor 1	GO Biological Process	GO:0019751	polyol metabolic process	98	0.0151057	1.2e-02	2.7e-02	3.8e+00	3.17448	1.89008	6	0.0089577	0.028436	336	3.4e-02	6.7e-02	6.3e+01	2.78084	1.79802	5	0.0510204
DNAm Plasminogen activator inhibitor 1	GO Biological Process	GO:0050996	positive regulation of lipid catabolic process	19	0.0060423	1.3e-02	2.7e-02	3.8e+00	6.29815	0.47633	3	0.00225749	0.014218	467	4.7e-02	7.7e-02	9.8e+01	5.73732	0.348595	2	0.105263
DNAm Plasminogen activator inhibitor 1	GO Biological Process	GO:0034103	regulation of tissue remodeling	52	0.0120846	1.3e-02	2.7e-02	3.8e+00	3.66291	1.36504	5	0.00646937	0.0236967	145	1.5e-02	5.0e-02	9.6e+01	4.19266	0.954049	4	0.0769231
DNAm Plasminogen activator inhibitor 1	GO Biological Process	GO:0050776	regulation of immune response	698	0.0574018	1.3e-02	2.7e-02	3.8e+00	1.67619	13.125	22	0.0622037	0.104265	588	5.7e-02	8.7e-02	6.9e+01	1.48365	12.8063	19	0.0272206
DNAm Plasminogen activator inhibitor 1	GO Biological Process	GO:0032319	regulation of Rho GTPase activity	111	0.0181269	1.3e-02	2.7e-02	3.9e+00	2.60685	3.06884	8	0.0145442	0.0379147	161	1.7e-02	5.0e-02	7.1e+01	2.94619	2.03653	6	0.054054
DNAm Plasminogen activator inhibitor 1	GO Biological Process	GO:0009144	purine nucleoside triphosphate metabolic process	442	0.0392749	1.3e-02	2.7e-02	3.9e+00	1.97072	7.10402	14	0.0336683	0.0663507	616	6.5e-02	9.6e-02	1.2e+02	1.60307	8.10942	13	0.0294118
DNAm Plasminogen activator inhibitor 1	GO Biological Process	GO:0000398	mRNA splicing, via spliceosome	203	0.0181269	1.3e-02	2.7e-02	3.9e+00	2.60401	3.07219	8	0.0145601	0.0379147	1411	1.7e-01	1.9e-01	6.8e+01	1.61097	3.72446	6	0.0295567
DNAm Plasminogen activator inhibitor 1	GO Biological Process	GO:0055092	sterol homeostasis	56	0.00906344	1.3e-02	2.7e-02	3.9e+00	4.47729	0.893397	4	0.00423411	0.0189574	767	8.3e-02	1.1e-01	9.0e+01	2.91989	1.02744	3	0.0535714
DNAm Plasminogen activator inhibitor 1	GO Biological Process	GO:0009199	ribonucleoside triphosphate metabolic process	443	0.0392749	1.3e-02	2.7e-02	3.9e+00	1.96898	7.11029	14	0.0336981	0.0663507	618	6.6e-02	9.6e-02	1.3e+02	1.59946	8.12777	13	0.0293454
DNAm Plasminogen activator inhibitor 1	GO Biological Process	GO:0000737	DNA catabolic process, endonucleolytic	28	0.0060423	1.3e-02	2.7e-02	3.9e+00	6.22256	0.482117	3	0.00228491	0.014218	858	9.3e-02	1.2e-01	5.6e+01	3.89318	0.513719	2	0.0714286
DNAm Plasminogen activator inhibitor 1	GO Biological Process	GO:0046486	glycerolipid metabolic process	291	0.0332326	1.3e-02	2.7e-02	3.9e+00	2.19058	5.0215	11	0.0237986	0.0521327	235	1.9e-02	5.3e-02	8.0e+01	2.06031	5.33901	11	0.0378007
DNAm Plasminogen activator inhibitor 1	GO Biological Process	GO:0002682	regulation of immune system process	1066	0.081571	1.3e-02	2.7e-02	4.0e+00	1.50336	21.2856	32	0.10088	0.151659	587	5.6e-02	8.7e-02	1.3e+02	1.38051	19.558	27	0.0253283
DNAm Plasminogen activator inhibitor 1	GO Biological Process	GO:0032321	positive regulation of Rho GTPase activity	80	0.0151057	1.3e-02	2.7e-02	4.0e+00	3.14214	1.90952	6	0.00904988	0.028436	148	1.6e-02	5.0e-02	1.1e+02	3.40653	1.46777	5	0.0625
DNAm Plasminogen activator inhibitor 1	GO Biological Process	GO:0010876	lipid localization	196	0.021148	1.3e-02	2.8e-02	4.1e+00	2.41767	3.7226	9	0.0176426	0.042654	643	7.0e-02	1.0e-01	6.5e+01	1.94659	3.59603	7	0.0357143
DNAm Plasminogen activator inhibitor 1	GO Biological Process	GO:1902105	regulation of leukocyte differentiation	191	0.0241692	1.3e-02	2.8e-02	4.1e+00	2.28526	4.37586	10	0.0207387	0.0473934	277	2.5e-02	5.8e-02	2.9e+00	2.28291	3.5043	8	0.0418848
DNAm Plasminogen activator inhibitor 1	GO Biological Process	GO:0051348	negative regulation of transferase activity	195	0.021148	1.3e-02	2.8e-02	4.1e+00	2.28401	4.37827	10	0.0207501	0.0473934	637	6.9e-02	9.8e-02	7.4e+01	1.95657	3.57768	7	0.0358974
DNAm Plasminogen activator inhibitor 1	GO Biological Process	GO:0046034	ATP metabolic process	191	0.021148	1.4e-02	2.8e-02	4.2e+00	2.57309	3.10911	8	0.0147351	0.0379147	611	6.3e-02	9.3e-02	5.1e+01	1.99755	3.5043	7	0.0366492
DNAm Plasminogen activator inhibitor 1	GO Biological Process	GO:0000375	RNA splicing, via transesterification reactions	208	0.0181269	1.4e-02	2.8e-02	4.2e+00	2.56719	3.11625	8	0.0147689	0.0379147	1448	1.8e-01	2.0e-01	1.9e+01	1.57225	3.8162	6	0.0288462
DNAm Plasminogen activator inhibitor 1	GO Biological Process	GO:0002719	negative regulation of cytokine production involved in immune response	12	0.00302115	1.4e-02	2.8e-02	4.3e+00	11.1896	0.178737	2	0.000847097	0.00947867	1530	2.0e-01	2.1e-01	6.9e+01	4.54204	0.220165	1	0.0833333
DNAm Plasminogen activator inhibitor 1	GO Biological Process	GO:0030183	B cell differentiation	69	0.0151057	1.4e-02	2.8e-02	4.3e+00	3.08416	1.94543	6	0.00922003	0.028436	97	8.7e-03	4.3e-02	6.2e+01	3.9496	1.26595	5	0.0724638
DNAm Plasminogen activator inhibitor 1	GO Biological Process	GO:0022602	ovulation cycle process	82	0.021148	1.5e-02	2.9e-02	4.4e+00	2.76107	2.53525	7	0.0120154	0.0331754	13	7.7e-04	1.9e-02	9.7e+01	4.65283	1.50446	7	0.0853658
DNAm Plasminogen activator inhibitor 1	GO Biological Process	GO:0019827	stem cell maintenance	98	0.0181269	1.5e-02	2.9e-02	4.5e+00	2.53591	3.15469	8	0.0149511	0.0379147	107	9.4e-03	4.3e-02	4.7e+01	3.33701	1.79802	6	0.0612245
DNAm Plasminogen activator inhibitor 1	GO Biological Process	GO:0008610	lipid biosynthetic process	493	0.0513595	1.5e-02	2.9e-02	4.5e+00	1.79759	9.45712	17	0.0448205	0.0805687	109	9.9e-03	4.4e-02	6.5e+01	1.87947	9.04512	17	0.0344828
DNAm Plasminogen activator inhibitor 1	GO Biological Process	GO:0050796	regulation of insulin secretion	151	0.0241692	1.5e-02	2.9e-02	4.5e+00	2.24787	4.44866	10	0.0210837	0.0473934	92	6.8e-03	3.6e-02	6.1e+01	2.88766	2.77041	8	0.0529801
DNAm Plasminogen activator inhibitor 1	GO Biological Process	GO:1901652	response to peptide	360	0.0392749	1.5e-02	2.9e-02	4.6e+00	1.92857	7.25927	14	0.0344041	0.0663507	150	1.6e-02	5.0e-02	5.8e+01	1.96822	6.60496	13	0.0361111
DNAm Plasminogen activator inhibitor 1	GO Biological Process	GO:0001818	negative regulation of cytokine production	141	0.0120846	1.5e-02	2.9e-02	4.6e+00	2.73283	2.56145	7	0.0121396	0.0331754	1873	2.6e-01	2.7e-01	1.3e+02	1.54623	2.58694	4	0.0283688
DNAm Plasminogen activator inhibitor 1	GO Biological Process	GO:0006386	termination of RNA polymerase III transcription	18	0.0060423	1.6e-02	3.0e-02	4.8e+00	10.5406	0.189742	2	0.00089925	0.00947867	447	4.2e-02	7.4e-02	1.0e+02	6.05606	0.330248	2	0.111111
DNAm Plasminogen activator inhibitor 1	GO Biological Process	GO:0006385	transcription elongation from RNA polymerase III promoter	18	0.0060423	1.6e-02	3.0e-02	4.8e+00	10.5406	0.189742	2	0.00089925	0.00947867	447	4.2e-02	7.4e-02	6.9e+01	6.05606	0.330248	2	0.111111
DNAm Plasminogen activator inhibitor 1	GO Biological Process	GO:1901698	response to nitrogen compound	674	0.0664653	1.6e-02	3.0e-02	4.9e+00	1.59639	15.0339	24	0.0712506	0.113744	91	6.7e-03	3.6e-02	7.8e+01	1.77908	12.3659	22	0.032641
DNAm Plasminogen activator inhibitor 1	GO Biological Process	GO:0036092	phosphatidylinositol-3-phosphate biosynthetic process	15	0.0060423	1.6e-02	3.0e-02	4.9e+00	5.70607	0.525756	3	0.00249174	0.014218	312	3.0e-02	6.2e-02	3.1e+01	7.26727	0.275207	2	0.133333
DNAm Plasminogen activator inhibitor 1	GO Biological Process	GO:0072329	monocarboxylic acid catabolic process	81	0.0120846	1.6e-02	3.0e-02	5.0e+00	3.42159	1.46131	5	0.00692562	0.0236967	607	6.2e-02	9.2e-02	1.5e+02	2.69158	1.48612	4	0.0493827
DNAm Plasminogen activator inhibitor 1	GO Biological Process	GO:0033033	negative regulation of myeloid cell apoptotic process	12	0.0060423	1.7e-02	3.0e-02	5.0e+00	10.2757	0.194634	2	0.000922434	0.00947867	240	2.0e-02	5.3e-02	9.8e+01	9.08409	0.220165	2	0.166667
DNAm Plasminogen activator inhibitor 1	GO Biological Process	GO:0006577	amino-acid betaine metabolic process	14	0.00302115	1.7e-02	3.0e-02	5.1e+00	10.251	0.195104	2	0.000924661	0.00947867	1698	2.3e-01	2.4e-01	6.5e+01	3.89318	0.256859	1	0.0714286
DNAm Plasminogen activator inhibitor 1	GO Biological Process	GO:0033032	regulation of myeloid cell apoptotic process	22	0.00906344	1.7e-02	3.0e-02	5.1e+00	5.64112	0.531809	3	0.00252042	0.014218	93	7.3e-03	3.7e-02	2.7e+01	7.43244	0.403636	3	0.136364
DNAm Plasminogen activator inhibitor 1	GO Biological Process	GO:0045637	regulation of myeloid cell differentiation	158	0.0181269	1.7e-02	3.0e-02	5.1e+00	2.32268	3.87483	9	0.0183641	0.042654	657	7.1e-02	1.0e-01	6.5e+01	2.06979	2.89884	6	0.0379747
DNAm Plasminogen activator inhibitor 1	GO Biological Process	GO:0032823	regulation of natural killer cell differentiation	13	0.0060423	1.7e-02	3.0e-02	5.1e+00	10.1668	0.196719	2	0.000932319	0.00947867	266	2.3e-02	5.5e-02	6.5e+01	8.38531	0.238512	2	0.153846
DNAm Plasminogen activator inhibitor 1	GO Biological Process	GO:0030218	erythrocyte differentiation	68	0.0120846	1.7e-02	3.0e-02	5.1e+00	3.39136	1.47433	5	0.00698736	0.0236967	341	3.6e-02	6.9e-02	1.1e+02	3.20615	1.2476	4	0.0588235
DNAm Plasminogen activator inhibitor 1	GO Biological Process	GO:0070229	negative regulation of lymphocyte apoptotic process	19	0.0060423	1.8e-02	3.1e-02	5.4e+00	5.52609	0.542879	3	0.00257289	0.014218	467	4.7e-02	7.7e-02	5.6e+01	5.73732	0.348595	2	0.105263
DNAm Plasminogen activator inhibitor 1	GO Biological Process	GO:0046128	purine ribonucleoside metabolic process	504	0.0422961	1.8e-02	3.1e-02	5.4e+00	1.84133	8.14629	15	0.038608	0.0710901	764	8.2e-02	1.1e-01	6.9e+01	1.51402	9.24694	14	0.0277778
DNAm Plasminogen activator inhibitor 1	GO Biological Process	GO:1901264	carbohydrate derivative transport	35	0.0060423	1.8e-02	3.2e-02	5.5e+00	5.4662	0.548827	3	0.00260108	0.014218	1133	1.3e-01	1.6e-01	8.1e+01	3.11455	0.642148	2	0.0571429
DNAm Plasminogen activator inhibitor 1	GO Biological Process	GO:0060416	response to growth hormone stimulus	34	0.0120846	1.8e-02	3.2e-02	5.5e+00	4.03309	0.991795	4	0.00470045	0.0189574	53	3.3e-03	2.7e-02	1.0e+02	6.4123	0.623801	4	0.117647
DNAm Plasminogen activator inhibitor 1	GO Biological Process	GO:0042278	purine nucleoside metabolic process	507	0.0422961	1.8e-02	3.2e-02	5.6e+00	1.83392	8.17921	15	0.038764	0.0710901	776	8.5e-02	1.1e-01	6.0e+01	1.50506	9.30198	14	0.0276134
DNAm Plasminogen activator inhibitor 1	GO Biological Process	GO:0009141	nucleoside triphosphate metabolic process	461	0.0392749	1.8e-02	3.2e-02	5.6e+00	1.88122	7.442	14	0.0352701	0.0663507	774	8.4e-02	1.1e-01	1.0e+02	1.537	8.45801	13	0.0281996
DNAm Plasminogen activator inhibitor 1	GO Biological Process	GO:0006875	cellular metal ion homeostasis	333	0.0362538	1.8e-02	3.2e-02	5.6e+00	1.88068	7.44412	14	0.0352802	0.0663507	253	2.0e-02	5.3e-02	6.9e+01	1.96413	6.10958	12	0.036036
DNAm Plasminogen activator inhibitor 1	GO Biological Process	GO:0045580	regulation of T cell differentiation	90	0.0151057	1.9e-02	3.2e-02	5.8e+00	2.88592	2.07906	6	0.00985337	0.028436	278	2.5e-02	5.8e-02	8.2e+01	3.02803	1.65124	5	0.0555556
DNAm Plasminogen activator inhibitor 1	GO Biological Process	GO:0010719	negative regulation of epithelial to mesenchymal transition	14	0.0060423	1.9e-02	3.2e-02	5.8e+00	5.3595	0.559754	3	0.00265286	0.014218	289	2.6e-02	5.8e-02	1.5e+02	7.78636	0.256859	2	0.142857
DNAm Plasminogen activator inhibitor 1	GO Biological Process	GO:0046883	regulation of hormone secretion	199	0.0302115	1.9e-02	3.2e-02	5.8e+00	1.9884	6.03501	12	0.0286019	0.056872	60	3.8e-03	2.7e-02	9.4e+01	2.73892	3.65107	10	0.0502513
DNAm Plasminogen activator inhibitor 1	GO Biological Process	GO:0010038	response to metal ion	227	0.0271903	1.9e-02	3.2e-02	5.9e+00	2.1536	4.64338	10	0.0220066	0.0473934	275	2.5e-02	5.8e-02	2.1e+02	2.16097	4.16479	9	0.0396476
DNAm Plasminogen activator inhibitor 1	GO Biological Process	GO:0034374	low-density lipoprotein particle remodeling	11	0.00302115	2.0e-02	3.2e-02	6.0e+00	9.37526	0.213327	2	0.00101103	0.00947867	1449	1.8e-01	2.0e-01	7.4e+01	4.95496	0.201818	1	0.0909091
DNAm Plasminogen activator inhibitor 1	GO Biological Process	GO:0007586	digestion	106	0.0181269	2.0e-02	3.2e-02	6.0e+00	2.86188	2.09652	6	0.00993613	0.028436	132	1.3e-02	4.9e-02	8.6e+01	3.08516	1.94479	6	0.0566038
DNAm Plasminogen activator inhibitor 1	GO Biological Process	GO:0045577	regulation of B cell differentiation	20	0.0060423	2.0e-02	3.2e-02	6.0e+00	5.29559	0.566509	3	0.00268488	0.014218	498	5.1e-02	8.2e-02	4.7e+01	5.45045	0.366942	2	0.1
DNAm Plasminogen activator inhibitor 1	GO Biological Process	GO:0030101	natural killer cell activation	32	0.00906344	2.0e-02	3.2e-02	6.0e+00	5.29518	0.566553	3	0.00268509	0.014218	247	2.0e-02	5.3e-02	6.5e+01	5.1098	0.587107	3	0.09375
DNAm Plasminogen activator inhibitor 1	GO Biological Process	GO:0044281	small molecule metabolic process	2427	0.169184	2.0e-02	3.2e-02	6.0e+00	1.30216	42.2376	55	0.200178	0.260663	435	4.0e-02	7.4e-02	9.3e+01	1.25762	44.5284	56	0.0230738
DNAm Plasminogen activator inhibitor 1	GO Biological Process	GO:0034504	protein localization to nucleus	132	0.021148	2.0e-02	3.2e-02	6.0e+00	2.40239	3.33001	8	0.0157821	0.0379147	115	1.1e-02	4.6e-02	4.9e+01	2.89039	2.42182	7	0.0530303
DNAm Plasminogen activator inhibitor 1	GO Biological Process	GO:0050801	ion homeostasis	461	0.0422961	2.0e-02	3.2e-02	6.0e+00	1.73828	9.77979	17	0.0463497	0.0805687	466	4.6e-02	7.7e-02	6.7e+01	1.65524	8.45801	14	0.0303688
DNAm Plasminogen activator inhibitor 1	GO Biological Process	GO:0002819	regulation of adaptive immune response	112	0.00906344	2.0e-02	3.2e-02	6.0e+00	2.8556	2.10114	6	0.00995799	0.028436	2191	3.4e-01	3.4e-01	1.5e+02	1.45994	2.05488	3	0.0267857
DNAm Plasminogen activator inhibitor 1	GO Biological Process	GO:0043691	reverse cholesterol transport	17	0.00302115	2.0e-02	3.2e-02	6.1e+00	9.28098	0.215495	2	0.0010213	0.00947867	1896	2.7e-01	2.8e-01	1.8e+02	3.20615	0.311901	1	0.0588235
DNAm Plasminogen activator inhibitor 1	GO Biological Process	GO:0071379	cellular response to prostaglandin stimulus	10	0.00302115	2.0e-02	3.2e-02	6.1e+00	9.2571	0.216051	2	0.00102394	0.00947867	1362	1.7e-01	1.9e-01	3.2e+01	5.45045	0.183471	1	0.1
DNAm Plasminogen activator inhibitor 1	GO Biological Process	GO:1900078	positive regulation of cellular response to insulin stimulus	11	0.0060423	2.0e-02	3.2e-02	6.1e+00	9.2296	0.216694	2	0.00102699	0.00947867	154	1.7e-02	5.0e-02	1.2e+02	9.90991	0.201818	2	0.181818
DNAm Plasminogen activator inhibitor 1	GO Biological Process	GO:0006006	glucose metabolic process	156	0.0181269	2.0e-02	3.2e-02	6.2e+00	2.57405	2.71945	7	0.0128884	0.0331754	635	6.8e-02	9.8e-02	1.5e+02	2.09633	2.86215	6	0.0384615
DNAm Plasminogen activator inhibitor 1	GO Biological Process	GO:0032720	negative regulation of tumor necrosis factor production	30	0.0060423	2.1e-02	3.2e-02	6.2e+00	5.21414	0.575359	3	0.00272682	0.014218	905	1.0e-01	1.3e-01	9.8e+01	3.63363	0.550413	2	0.0666667
DNAm Plasminogen activator inhibitor 1	GO Biological Process	GO:0046474	glycerophospholipid biosynthetic process	185	0.021148	2.1e-02	3.3e-02	6.4e+00	2.37429	3.36943	8	0.0159689	0.0379147	575	5.5e-02	8.5e-02	1.6e+02	2.06233	3.39421	7	0.0378378
DNAm Plasminogen activator inhibitor 1	GO Biological Process	GO:0046889	positive regulation of lipid biosynthetic process	46	0.00906344	2.1e-02	3.3e-02	6.4e+00	3.85379	1.03794	4	0.00491914	0.0189574	504	5.2e-02	8.3e-02	7.7e+01	3.55464	0.843966	3	0.0652174
DNAm Plasminogen activator inhibitor 1	GO Biological Process	GO:0030098	lymphocyte differentiation	169	0.0271903	2.2e-02	3.4e-02	6.7e+00	2.10898	4.74162	10	0.0224722	0.0473934	64	4.1e-03	2.7e-02	9.0e+01	2.90261	3.10066	9	0.0532544
DNAm Plasminogen activator inhibitor 1	GO Biological Process	GO:0090276	regulation of peptide hormone secretion	164	0.0241692	2.2e-02	3.4e-02	6.7e+00	2.10728	4.74545	10	0.0224903	0.0473934	114	1.1e-02	4.6e-02	2.2e+01	2.65876	3.00892	8	0.0487805
DNAm Plasminogen activator inhibitor 1	GO Biological Process	GO:0043067	regulation of programmed cell death	1171	0.10574	2.2e-02	3.4e-02	6.7e+00	1.40583	25.6076	36	0.121363	0.170616	49	3.1e-03	2.6e-02	8.6e+01	1.62908	21.4844	35	0.029889
DNAm Plasminogen activator inhibitor 1	GO Biological Process	GO:0019318	hexose metabolic process	195	0.021148	2.2e-02	3.4e-02	6.8e+00	2.34743	3.40798	8	0.0161516	0.0379147	637	6.9e-02	9.8e-02	1.5e+02	1.95657	3.57768	7	0.0358974
DNAm Plasminogen activator inhibitor 1	GO Biological Process	GO:0051492	regulation of stress fiber assembly	42	0.00906344	2.2e-02	3.4e-02	6.8e+00	3.78338	1.05725	4	0.00501068	0.0189574	439	4.2e-02	7.4e-02	1.2e+02	3.89318	0.770578	3	0.0714286
DNAm Plasminogen activator inhibitor 1	GO Biological Process	GO:0042698	ovulation cycle	89	0.021148	2.3e-02	3.4e-02	6.9e+00	2.5194	2.77844	7	0.013168	0.0331754	23	1.2e-03	2.2e-02	7.4e+01	4.28687	1.63289	7	0.0786517
DNAm Plasminogen activator inhibitor 1	GO Biological Process	GO:1900117	regulation of execution phase of apoptosis	15	0.0060423	2.3e-02	3.4e-02	6.9e+00	8.65469	0.231089	2	0.00109521	0.00947867	312	3.0e-02	6.2e-02	1.9e+02	7.26727	0.275207	2	0.133333
DNAm Plasminogen activator inhibitor 1	GO Biological Process	GO:0050864	regulation of B cell activation	87	0.0120846	2.3e-02	3.4e-02	6.9e+00	2.76257	2.17189	6	0.0102933	0.028436	728	7.6e-02	1.1e-01	1.7e+02	2.50596	1.5962	4	0.045977
DNAm Plasminogen activator inhibitor 1	GO Biological Process	GO:0051250	negative regulation of lymphocyte activation	96	0.00906344	2.3e-02	3.5e-02	7.1e+00	2.7523	2.18	6	0.0103318	0.028436	1872	2.6e-01	2.7e-01	1.3e+02	1.70327	1.76132	3	0.03125
DNAm Plasminogen activator inhibitor 1	GO Biological Process	GO:0032355	response to estradiol stimulus	77	0.0151057	2.4e-02	3.5e-02	7.1e+00	2.74629	2.18476	6	0.0103543	0.028436	133	1.4e-02	4.9e-02	9.0e+00	3.53925	1.41273	5	0.0649351
DNAm Plasminogen activator inhibitor 1	GO Biological Process	GO:0008406	gonad development	196	0.0362538	2.4e-02	3.5e-02	7.4e+00	1.92141	6.24541	12	0.0295991	0.056872	8	2.8e-04	1.1e-02	1.2e+02	3.33701	3.59603	12	0.0612245
DNAm Plasminogen activator inhibitor 1	GO Biological Process	GO:0034101	erythrocyte homeostasis	75	0.0120846	2.4e-02	3.5e-02	7.4e+00	3.08584	1.62031	5	0.00767918	0.0236967	484	4.9e-02	8.0e-02	9.4e+01	2.90691	1.37603	4	0.0533333
DNAm Plasminogen activator inhibitor 1	GO Biological Process	GO:0060337	type I interferon-mediated signaling pathway	64	0.0060423	2.4e-02	3.5e-02	7.4e+00	4.88576	0.614029	3	0.00291009	0.014218	2143	3.3e-01	3.3e-01	1.0e+02	1.70327	1.17421	2	0.03125
DNAm Plasminogen activator inhibitor 1	GO Biological Process	GO:0071357	cellular response to type I interferon	65	0.0060423	2.4e-02	3.5e-02	7.4e+00	4.88225	0.614471	3	0.00291219	0.014218	2184	3.4e-01	3.4e-01	2.0e+02	1.67706	1.19256	2	0.0307692
DNAm Plasminogen activator inhibitor 1	GO Biological Process	GO:0046488	phosphatidylinositol metabolic process	129	0.0181269	2.5e-02	3.5e-02	7.4e+00	2.71794	2.20755	6	0.0104623	0.028436	323	3.2e-02	6.4e-02	1.9e+02	2.53509	2.36678	6	0.0465116
DNAm Plasminogen activator inhibitor 1	GO Biological Process	GO:0050686	negative regulation of mRNA processing	17	0.00302115	2.5e-02	3.5e-02	7.5e+00	8.30365	0.240858	2	0.00114151	0.00947867	1896	2.7e-01	2.8e-01	9.4e+01	3.20615	0.311901	1	0.0588235
DNAm Plasminogen activator inhibitor 1	GO Biological Process	GO:0006644	phospholipid metabolic process	278	0.0302115	2.5e-02	3.6e-02	7.5e+00	2.06656	4.83895	10	0.0229334	0.0473934	327	3.3e-02	6.6e-02	1.3e+02	1.9606	5.10049	10	0.0359712
DNAm Plasminogen activator inhibitor 1	GO Biological Process	GO:0033344	cholesterol efflux	22	0.00302115	2.5e-02	3.6e-02	7.6e+00	8.23778	0.242784	2	0.00115063	0.00947867	2156	3.3e-01	3.4e-01	1.1e+02	2.47748	0.403636	1	0.0454546
DNAm Plasminogen activator inhibitor 1	GO Biological Process	GO:0034340	response to type I interferon	66	0.0060423	2.5e-02	3.6e-02	7.6e+00	4.82377	0.62192	3	0.00294749	0.014218	2195	3.4e-01	3.4e-01	2.0e+02	1.65165	1.21091	2	0.030303
DNAm Plasminogen activator inhibitor 1	GO Biological Process	GO:0006869	lipid transport	179	0.0181269	2.5e-02	3.6e-02	7.7e+00	2.29049	3.4927	8	0.0165531	0.0379147	1002	1.1e-01	1.3e-01	9.4e+01	1.82697	3.28413	6	0.0335196
DNAm Plasminogen activator inhibitor 1	GO Biological Process	GO:0009167	purine ribonucleoside monophosphate metabolic process	217	0.021148	2.6e-02	3.6e-02	7.7e+00	2.28749	3.49728	8	0.0165748	0.0379147	978	1.1e-01	1.3e-01	1.4e+02	1.75821	3.98132	7	0.0322581
DNAm Plasminogen activator inhibitor 1	GO Biological Process	GO:0009126	purine nucleoside monophosphate metabolic process	218	0.021148	2.6e-02	3.6e-02	7.8e+00	2.28529	3.50065	8	0.0165908	0.0379147	980	1.1e-01	1.3e-01	5.4e+01	1.75015	3.99967	7	0.0321101
DNAm Plasminogen activator inhibitor 1	GO Biological Process	GO:0050727	regulation of inflammatory response	212	0.021148	2.6e-02	3.6e-02	7.8e+00	2.15364	4.17897	9	0.0198055	0.042654	875	9.6e-02	1.2e-01	1.1e+02	1.79968	3.88958	7	0.0330189
DNAm Plasminogen activator inhibitor 1	GO Biological Process	GO:0072350	tricarboxylic acid metabolic process	12	0.0060423	2.6e-02	3.6e-02	7.8e+00	8.08761	0.247292	2	0.001172	0.00947867	240	2.0e-02	5.3e-02	1.2e+02	9.08409	0.220165	2	0.166667
DNAm Plasminogen activator inhibitor 1	GO Biological Process	GO:0002862	negative regulation of inflammatory response to antigenic stimulus	11	0.00302115	2.6e-02	3.6e-02	7.9e+00	8.05582	0.248268	2	0.00117662	0.00947867	1449	1.8e-01	2.0e-01	1.5e+02	4.95496	0.201818	1	0.0909091
DNAm Plasminogen activator inhibitor 1	GO Biological Process	GO:0019218	regulation of steroid metabolic process	69	0.0120846	2.6e-02	3.6e-02	7.9e+00	3.02549	1.65262	5	0.00783234	0.0236967	420	3.8e-02	7.2e-02	1.1e+02	3.15968	1.26595	4	0.057971
DNAm Plasminogen activator inhibitor 1	GO Biological Process	GO:0065003	macromolecular complex assembly	1001	0.0694864	2.7e-02	3.6e-02	8.0e+00	1.47921	18.2529	27	0.0865068	0.127962	1324	1.6e-01	1.8e-01	1.2e+02	1.25235	18.3654	23	0.022977
DNAm Plasminogen activator inhibitor 1	GO Biological Process	GO:0032926	negative regulation of activin receptor signaling pathway	10	0.0060423	2.7e-02	3.6e-02	8.0e+00	7.98211	0.25056	2	0.00118749	0.00947867	134	1.4e-02	4.9e-02	5.6e+00	10.9009	0.183471	2	0.2
DNAm Plasminogen activator inhibitor 1	GO Biological Process	GO:0006950	response to stress	2962	0.196375	2.7e-02	3.6e-02	8.0e+00	1.24915	51.2349	64	0.242819	0.303318	631	6.7e-02	9.7e-02	9.6e+01	1.19608	54.3441	65	0.0219446
DNAm Plasminogen activator inhibitor 1	GO Biological Process	GO:0031329	regulation of cellular catabolic process	625	0.0574018	2.7e-02	3.7e-02	8.2e+00	1.53599	14.9741	23	0.0709672	0.109005	265	2.2e-02	5.5e-02	1.7e+02	1.65694	11.4669	19	0.0304
DNAm Plasminogen activator inhibitor 1	GO Biological Process	GO:0045910	negative regulation of DNA recombination	14	0.00302115	2.7e-02	3.7e-02	8.3e+00	7.86398	0.254324	2	0.00120533	0.00947867	1698	2.3e-01	2.4e-01	9.6e+01	3.89318	0.256859	1	0.0714286
DNAm Plasminogen activator inhibitor 1	GO Biological Process	GO:0042401	cellular biogenic amine biosynthetic process	18	0.0060423	2.7e-02	3.7e-02	8.3e+00	7.84349	0.254989	2	0.00120848	0.00947867	447	4.2e-02	7.4e-02	2.1e+02	6.05606	0.330248	2	0.111111
DNAm Plasminogen activator inhibitor 1	GO Biological Process	GO:0043547	positive regulation of GTPase activity	313	0.0362538	2.7e-02	3.7e-02	8.3e+00	1.78242	7.85451	14	0.0372251	0.0663507	128	1.3e-02	4.9e-02	1.2e+02	2.08963	5.74264	12	0.0383387
DNAm Plasminogen activator inhibitor 1	GO Biological Process	GO:0070243	regulation of thymocyte apoptotic process	11	0.0060423	2.8e-02	3.7e-02	8.4e+00	7.79006	0.256737	2	0.00121677	0.00947867	154	1.7e-02	5.0e-02	1.4e+02	9.90991	0.201818	2	0.181818
DNAm Plasminogen activator inhibitor 1	GO Biological Process	GO:0009119	ribonucleoside metabolic process	530	0.0422961	2.8e-02	3.7e-02	8.4e+00	1.73805	8.63036	15	0.0409022	0.0710901	998	1.1e-01	1.3e-01	1.2e+02	1.43974	9.72396	14	0.0264151
DNAm Plasminogen activator inhibitor 1	GO Biological Process	GO:0006111	regulation of gluconeogenesis	24	0.00906344	2.8e-02	3.7e-02	8.5e+00	4.62349	0.648861	3	0.00307517	0.014218	105	9.3e-03	4.3e-02	1.4e+02	6.81307	0.44033	3	0.125
DNAm Plasminogen activator inhibitor 1	GO Biological Process	GO:0022407	regulation of cell-cell adhesion	80	0.021148	2.8e-02	3.7e-02	8.5e+00	2.40925	2.90546	7	0.01377	0.0331754	12	6.6e-04	1.9e-02	1.1e+02	4.76915	1.46777	7	0.0875
DNAm Plasminogen activator inhibitor 1	GO Biological Process	GO:0002864	regulation of acute inflammatory response to antigenic stimulus	10	0.00302115	2.8e-02	3.7e-02	8.6e+00	7.70944	0.259422	2	0.00122949	0.00947867	1362	1.7e-01	1.9e-01	9.6e+01	5.45045	0.183471	1	0.1
DNAm Plasminogen activator inhibitor 1	GO Biological Process	GO:0009309	amine biosynthetic process	19	0.0060423	2.8e-02	3.7e-02	8.6e+00	7.69303	0.259976	2	0.00123211	0.00947867	467	4.7e-02	7.7e-02	7.2e+01	5.73732	0.348595	2	0.105263
DNAm Plasminogen activator inhibitor 1	GO Biological Process	GO:0009207	purine ribonucleoside triphosphate catabolic process	386	0.0332326	2.9e-02	3.7e-02	8.7e+00	1.87498	6.40005	12	0.030332	0.056872	894	1.0e-01	1.2e-01	4.7e+01	1.55324	7.08198	11	0.0284974
DNAm Plasminogen activator inhibitor 1	GO Biological Process	GO:1901699	cellular response to nitrogen compound	418	0.0453172	2.9e-02	3.7e-02	8.7e+00	1.69606	9.43362	16	0.0447091	0.0758294	112	1.1e-02	4.6e-02	1.2e+02	1.9559	7.66909	15	0.0358852
DNAm Plasminogen activator inhibitor 1	GO Biological Process	GO:0022618	ribonucleoprotein complex assembly	126	0.0120846	2.9e-02	3.7e-02	8.7e+00	2.61663	2.29303	6	0.0108674	0.028436	1579	2.0e-01	2.1e-01	2.5e+01	1.7303	2.31173	4	0.031746
DNAm Plasminogen activator inhibitor 1	GO Biological Process	GO:0015748	organophosphate ester transport	55	0.00906344	3.0e-02	3.7e-02	9.0e+00	3.45716	1.15702	4	0.0054835	0.0189574	747	8.0e-02	1.1e-01	1.1e+02	2.97297	1.00909	3	0.0545455
DNAm Plasminogen activator inhibitor 1	GO Biological Process	GO:0009994	oocyte differentiation	31	0.00906344	3.0e-02	3.7e-02	9.0e+00	4.50815	0.665462	3	0.00315385	0.014218	234	1.9e-02	5.3e-02	1.3e+02	5.27463	0.56876	3	0.0967742
DNAm Plasminogen activator inhibitor 1	GO Biological Process	GO:0032231	regulation of actin filament bundle assembly	48	0.00906344	3.0e-02	3.7e-02	9.0e+00	3.45337	1.15829	4	0.00548951	0.0189574	592	5.8e-02	8.8e-02	1.2e+01	3.40653	0.880661	3	0.0625
DNAm Plasminogen activator inhibitor 1	GO Biological Process	GO:0042113	B cell activation	115	0.0181269	3.0e-02	3.7e-02	9.1e+00	2.37484	2.94756	7	0.0139695	0.0331754	238	1.9e-02	5.3e-02	1.6e+02	2.84371	2.10992	6	0.0521739
DNAm Plasminogen activator inhibitor 1	GO Biological Process	GO:0009146	purine nucleoside triphosphate catabolic process	388	0.0332326	3.0e-02	3.7e-02	9.1e+00	1.86111	6.44777	12	0.0305581	0.056872	904	1.0e-01	1.3e-01	1.7e+02	1.54523	7.11867	11	0.0283505
DNAm Plasminogen activator inhibitor 1	GO Biological Process	GO:0032851	positive regulation of Rab GTPase activity	56	0.00906344	3.0e-02	3.7e-02	9.1e+00	3.44353	1.1616	4	0.0055052	0.0189574	767	8.3e-02	1.1e-01	1.3e+02	2.91989	1.02744	3	0.0535714
DNAm Plasminogen activator inhibitor 1	GO Biological Process	GO:0015074	DNA integration	12	0.00302115	3.1e-02	3.7e-02	9.3e+00	7.38599	0.270783	2	0.00128333	0.00947867	1530	2.0e-01	2.1e-01	7.9e+01	4.54204	0.220165	1	0.0833333
DNAm Plasminogen activator inhibitor 1	GO Biological Process	GO:0045540	regulation of cholesterol biosynthetic process	12	0.00302115	3.1e-02	3.7e-02	9.3e+00	7.37692	0.271116	2	0.00128491	0.00947867	1530	2.0e-01	2.1e-01	1.1e+02	4.54204	0.220165	1	0.0833333
DNAm Plasminogen activator inhibitor 1	GO Biological Process	GO:0030003	cellular cation homeostasis	360	0.0362538	3.1e-02	3.7e-02	9.3e+00	1.75572	7.97391	14	0.0377911	0.0663507	339	3.5e-02	6.7e-02	1.0e+02	1.81682	6.60496	12	0.0333333
DNAm Plasminogen activator inhibitor 1	GO Biological Process	GO:0043069	negative regulation of programmed cell death	664	0.0634441	3.1e-02	3.7e-02	9.3e+00	1.51749	15.1566	23	0.0718321	0.109005	121	1.1e-02	4.7e-02	8.6e+01	1.72379	12.1825	21	0.0316265
DNAm Plasminogen activator inhibitor 1	GO Biological Process	GO:0032313	regulation of Rab GTPase activity	57	0.00906344	3.1e-02	3.7e-02	9.3e+00	3.42227	1.16882	4	0.00553941	0.0189574	780	8.7e-02	1.1e-01	1.4e+01	2.86866	1.04578	3	0.0526316
DNAm Plasminogen activator inhibitor 1	GO Biological Process	GO:0006493	protein O-linked glycosylation	79	0.0120846	3.1e-02	3.7e-02	9.3e+00	2.89437	1.72749	5	0.00818717	0.0236967	590	5.7e-02	8.7e-02	1.9e+02	2.75972	1.44942	4	0.0506329
DNAm Plasminogen activator inhibitor 1	GO Biological Process	GO:0009143	nucleoside triphosphate catabolic process	392	0.0332326	3.1e-02	3.8e-02	9.4e+00	1.85075	6.48386	12	0.0307292	0.056872	983	1.1e-01	1.3e-01	2.1e+02	1.52946	7.19206	11	0.0280612
DNAm Plasminogen activator inhibitor 1	GO Biological Process	GO:1901021	positive regulation of calcium ion transmembrane transporter activity	17	0.00906344	3.1e-02	3.8e-02	9.4e+00	4.43475	0.676476	3	0.00320604	0.014218	55	3.4e-03	2.7e-02	7.4e+01	9.61845	0.311901	3	0.176471
DNAm Plasminogen activator inhibitor 1	GO Biological Process	GO:0008654	phospholipid biosynthetic process	208	0.0241692	3.1e-02	3.8e-02	9.5e+00	2.19703	3.64129	8	0.0172573	0.0379147	428	3.8e-02	7.2e-02	1.6e+02	2.09633	3.8162	8	0.0384615
DNAm Plasminogen activator inhibitor 1	GO Biological Process	GO:0043087	regulation of GTPase activity	358	0.0392749	3.1e-02	3.8e-02	9.5e+00	1.67596	9.54679	16	0.0452454	0.0758294	146	1.5e-02	5.0e-02	7.7e+01	1.97921	6.56826	13	0.0363129
DNAm Plasminogen activator inhibitor 1	GO Biological Process	GO:0046627	negative regulation of insulin receptor signaling pathway	24	0.0060423	3.1e-02	3.8e-02	9.5e+00	4.41205	0.679955	3	0.00322254	0.014218	649	7.1e-02	1.0e-01	1.3e+02	4.54204	0.44033	2	0.0833333
DNAm Plasminogen activator inhibitor 1	GO Biological Process	GO:0002698	negative regulation of immune effector process	61	0.0060423	3.2e-02	3.8e-02	9.6e+00	3.38468	1.18179	4	0.00560092	0.0189574	2054	3.1e-01	3.1e-01	3.5e+01	1.78703	1.11917	2	0.0327869
DNAm Plasminogen activator inhibitor 1	GO Biological Process	GO:0055094	response to lipoprotein particle stimulus	10	0.00302115	3.2e-02	3.8e-02	9.8e+00	7.18002	0.278551	2	0.00132015	0.00947867	1362	1.7e-01	1.9e-01	1.3e+02	5.45045	0.183471	1	0.1
DNAm Plasminogen activator inhibitor 1	GO Biological Process	GO:0045747	positive regulation of Notch signaling pathway	19	0.0060423	3.2e-02	3.8e-02	9.8e+00	4.37005	0.686492	3	0.00325351	0.014218	467	4.7e-02	7.7e-02	9.8e+01	5.73732	0.348595	2	0.105263
DNAm Plasminogen activator inhibitor 1	GO Biological Process	GO:0002761	regulation of myeloid leukocyte differentiation	88	0.0120846	3.2e-02	3.8e-02	9.8e+00	2.54389	2.35859	6	0.0111782	0.028436	741	7.9e-02	1.1e-01	7.4e+01	2.47748	1.61454	4	0.0454546
DNAm Plasminogen activator inhibitor 1	GO Biological Process	GO:0050865	regulation of cell activation	379	0.0362538	3.3e-02	3.8e-02	9.9e+00	1.70134	8.81656	15	0.0417846	0.0710901	479	4.8e-02	7.9e-02	1.1e+02	1.72574	6.95355	12	0.0316623
DNAm Plasminogen activator inhibitor 1	GO Biological Process	GO:0060674	placenta blood vessel development	28	0.0060423	3.3e-02	3.8e-02	1.0e+01	4.33845	0.691491	3	0.00327721	0.014218	858	9.3e-02	1.2e-01	1.4e+02	3.89318	0.513719	2	0.0714286
DNAm Plasminogen activator inhibitor 1	GO Biological Process	GO:0007210	serotonin receptor signaling pathway	14	0.0120846	3.3e-02	3.8e-02	1.0e+01	4.33596	0.691889	3	0.00327909	0.014218	7	9.6e-05	4.2e-03	1.4e+02	15.5727	0.256859	4	0.285714
DNAm Plasminogen activator inhibitor 1	GO Biological Process	GO:1900077	negative regulation of cellular response to insulin stimulus	26	0.0060423	3.3e-02	3.8e-02	1.0e+01	4.33282	0.692389	3	0.00328146	0.014218	755	8.2e-02	1.1e-01	5.4e+01	4.19266	0.477025	2	0.0769231
DNAm Plasminogen activator inhibitor 1	GO Biological Process	GO:0030097	hemopoiesis	405	0.0422961	3.3e-02	3.8e-02	1.0e+01	1.63495	10.3979	17	0.0492789	0.0805687	170	1.8e-02	5.3e-02	1.2e+02	1.88411	7.43058	14	0.0345679
DNAm Plasminogen activator inhibitor 1	GO Biological Process	GO:0071826	ribonucleoprotein complex subunit organization	132	0.0120846	3.3e-02	3.8e-02	1.0e+01	2.53221	2.36947	6	0.0112297	0.028436	1689	2.2e-01	2.4e-01	1.2e+02	1.65165	2.42182	4	0.030303
DNAm Plasminogen activator inhibitor 1	GO Biological Process	GO:0015909	long-chain fatty acid transport	37	0.0060423	3.3e-02	3.8e-02	1.0e+01	4.32897	0.693006	3	0.00328439	0.014218	1227	1.5e-01	1.7e-01	1.8e+01	2.94619	0.678843	2	0.054054
DNAm Plasminogen activator inhibitor 1	GO Biological Process	GO:0002902	regulation of B cell apoptotic process	15	0.00302115	3.3e-02	3.8e-02	1.0e+01	7.03429	0.284322	2	0.00134749	0.00947867	1773	2.4e-01	2.5e-01	1.3e+02	3.63363	0.275207	1	0.0666667
DNAm Plasminogen activator inhibitor 1	GO Biological Process	GO:0009150	purine ribonucleotide metabolic process	545	0.0453172	3.3e-02	3.8e-02	1.0e+01	1.66188	9.62764	16	0.0456286	0.0758294	739	7.8e-02	1.1e-01	1.0e+02	1.50012	9.99917	15	0.0275229
DNAm Plasminogen activator inhibitor 1	GO Biological Process	GO:0010243	response to organonitrogen compound	633	0.060423	3.4e-02	3.8e-02	1.0e+01	1.52005	14.4732	22	0.0685935	0.104265	130	1.3e-02	4.9e-02	9.8e+01	1.7221	11.6137	20	0.0315956
DNAm Plasminogen activator inhibitor 1	GO Biological Process	GO:0051496	positive regulation of stress fiber assembly	29	0.0060423	3.4e-02	3.8e-02	1.0e+01	4.29889	0.697854	3	0.00330737	0.014218	884	9.9e-02	1.2e-01	1.6e+02	3.75893	0.532066	2	0.0689655
DNAm Plasminogen activator inhibitor 1	GO Biological Process	GO:0055082	cellular chemical homeostasis	424	0.0422961	3.4e-02	3.8e-02	1.0e+01	1.6597	9.64032	16	0.0456887	0.0758294	281	2.5e-02	5.8e-02	8.9e+01	1.79968	7.77917	14	0.0330189
DNAm Plasminogen activator inhibitor 1	GO Biological Process	GO:0042592	homeostatic process	1046	0.0845922	3.4e-02	3.8e-02	1.0e+01	1.40314	22.0933	31	0.104707	0.146919	310	2.9e-02	6.2e-02	1.7e+02	1.45901	19.1911	28	0.0267686
DNAm Plasminogen activator inhibitor 1	GO Biological Process	GO:0048147	negative regulation of fibroblast proliferation	24	0.0060423	3.4e-02	3.8e-02	1.0e+01	4.28109	0.700755	3	0.00332111	0.014218	649	7.1e-02	1.0e-01	1.3e+02	4.54204	0.44033	2	0.0833333
DNAm Plasminogen activator inhibitor 1	GO Biological Process	GO:0061430	bone trabecula morphogenesis	10	0.00302115	3.4e-02	3.8e-02	1.0e+01	6.93634	0.288336	2	0.00136652	0.00947867	1362	1.7e-01	1.9e-01	2.0e+01	5.45045	0.183471	1	0.1
DNAm Plasminogen activator inhibitor 1	GO Biological Process	GO:0046130	purine ribonucleoside catabolic process	396	0.0332326	3.4e-02	3.8e-02	1.0e+01	1.82204	6.58604	12	0.0312135	0.056872	1011	1.1e-01	1.4e-01	1.3e+02	1.51402	7.26545	11	0.0277778
DNAm Plasminogen activator inhibitor 1	GO Biological Process	GO:0030155	regulation of cell adhesion	285	0.0392749	3.4e-02	3.8e-02	1.0e+01	1.68931	8.87935	15	0.0420822	0.0710901	43	2.4e-03	2.5e-02	1.6e+02	2.48617	5.22892	13	0.045614
DNAm Plasminogen activator inhibitor 1	GO Biological Process	GO:0033124	regulation of GTP catabolic process	361	0.0392749	3.5e-02	3.8e-02	1.0e+01	1.65443	9.67099	16	0.0458341	0.0758294	152	1.6e-02	5.0e-02	1.6e+02	1.96277	6.6233	13	0.0360111
DNAm Plasminogen activator inhibitor 1	GO Biological Process	GO:0015992	proton transport	66	0.00906344	3.5e-02	3.8e-02	1.1e+01	4.22643	0.709819	3	0.00336407	0.014218	1031	1.2e-01	1.4e-01	1.2e+02	2.47748	1.21091	3	0.0454546
DNAm Plasminogen activator inhibitor 1	GO Biological Process	GO:0046661	male sex differentiation	135	0.0271903	3.5e-02	3.8e-02	1.1e+01	2.03376	4.42529	9	0.0209729	0.042654	15	8.7e-04	2.0e-02	1.4e+02	3.63363	2.47686	9	0.0666667
DNAm Plasminogen activator inhibitor 1	GO Biological Process	GO:0044765	single-organism transport	2606	0.18429	3.5e-02	3.8e-02	1.1e+01	1.24274	48.2805	60	0.228818	0.28436	282	2.5e-02	5.8e-02	9.8e+01	1.27582	47.8125	61	0.0234075
DNAm Plasminogen activator inhibitor 1	GO Biological Process	GO:0032483	regulation of Rab protein signal transduction	60	0.00906344	3.6e-02	3.9e-02	1.1e+01	3.26338	1.22572	4	0.00580912	0.0189574	880	9.8e-02	1.2e-01	1.1e+02	2.72523	1.10083	3	0.05
DNAm Plasminogen activator inhibitor 1	GO Biological Process	GO:0043933	macromolecular complex subunit organization	1279	0.081571	3.6e-02	3.9e-02	1.1e+01	1.38647	23.0803	32	0.109385	0.151659	1819	2.5e-01	2.6e-01	1.1e+02	1.1506	23.4659	27	0.0211102
DNAm Plasminogen activator inhibitor 1	GO Biological Process	GO:0042454	ribonucleoside catabolic process	406	0.0332326	3.6e-02	3.9e-02	1.1e+01	1.80551	6.64634	12	0.0314992	0.056872	1119	1.3e-01	1.5e-01	8.1e+01	1.47672	7.44892	11	0.0270936
DNAm Plasminogen activator inhibitor 1	GO Biological Process	GO:0045604	regulation of epidermal cell differentiation	30	0.0060423	3.6e-02	3.9e-02	1.1e+01	4.16191	0.720823	3	0.00341623	0.014218	905	1.0e-01	1.3e-01	8.2e+01	3.63363	0.550413	2	0.0666667
DNAm Plasminogen activator inhibitor 1	GO Biological Process	GO:0001676	long-chain fatty acid metabolic process	83	0.00906344	3.7e-02	3.9e-02	1.1e+01	3.23424	1.23677	4	0.00586145	0.0189574	1518	2.0e-01	2.1e-01	6.6e+01	1.97004	1.52281	3	0.0361446
DNAm Plasminogen activator inhibitor 1	GO Biological Process	GO:0031668	cellular response to extracellular stimulus	125	0.0151057	3.7e-02	3.9e-02	1.1e+01	2.46845	2.43067	6	0.0115198	0.028436	750	8.0e-02	1.1e-01	1.9e+02	2.18018	2.29339	5	0.04
DNAm Plasminogen activator inhibitor 1	GO Biological Process	GO:0006873	cellular ion homeostasis	374	0.0362538	3.7e-02	3.9e-02	1.1e+01	1.71173	8.17885	14	0.0387623	0.0663507	458	4.4e-02	7.6e-02	9.4e+01	1.74881	6.86181	12	0.0320856
DNAm Plasminogen activator inhibitor 1	GO Biological Process	GO:0006611	protein export from nucleus	24	0.0060423	3.7e-02	3.9e-02	1.1e+01	6.66541	0.300056	2	0.00142207	0.00947867	649	7.1e-02	1.0e-01	1.7e+02	4.54204	0.44033	2	0.0833333
DNAm Plasminogen activator inhibitor 1	GO Biological Process	GO:0010941	regulation of cell death	1210	0.10574	3.7e-02	3.9e-02	1.1e+01	1.35208	26.6256	36	0.126188	0.170616	76	5.1e-03	3.0e-02	2.2e+02	1.57658	22.2	35	0.0289256
DNAm Plasminogen activator inhibitor 1	GO Biological Process	GO:0009118	regulation of nucleoside metabolic process	396	0.0422961	3.7e-02	3.9e-02	1.1e+01	1.61069	10.5545	17	0.0500214	0.0805687	143	1.5e-02	5.0e-02	5.6e+01	1.92693	7.26545	14	0.0353535
DNAm Plasminogen activator inhibitor 1	GO Biological Process	GO:0019752	carboxylic acid metabolic process	806	0.060423	3.7e-02	3.9e-02	1.1e+01	1.52085	13.8081	21	0.065441	0.0995261	979	1.1e-01	1.3e-01	6.1e+01	1.35247	14.7878	20	0.0248139
DNAm Plasminogen activator inhibitor 1	GO Biological Process	GO:0005996	monosaccharide metabolic process	228	0.021148	3.8e-02	3.9e-02	1.1e+01	2.11803	3.7771	8	0.0179009	0.0379147	1111	1.3e-01	1.5e-01	1.4e+02	1.67338	4.18314	7	0.0307017
DNAm Plasminogen activator inhibitor 1	GO Biological Process	GO:0097305	response to alcohol	226	0.0302115	3.8e-02	3.9e-02	1.1e+01	1.8544	5.93185	11	0.028113	0.0521327	104	9.1e-03	4.3e-02	1.6e+02	2.4117	4.14644	10	0.0442478
DNAm Plasminogen activator inhibitor 1	GO Biological Process	GO:0002674	negative regulation of acute inflammatory response	11	0.00302115	3.8e-02	3.9e-02	1.1e+01	6.58029	0.303938	2	0.00144046	0.00947867	1449	1.8e-01	2.0e-01	2.5e+02	4.95496	0.201818	1	0.0909091
DNAm Plasminogen activator inhibitor 1	GO Biological Process	GO:0006820	anion transport	394	0.0362538	3.8e-02	3.9e-02	1.1e+01	1.74612	7.4451	13	0.0352848	0.0616114	599	6.0e-02	9.0e-02	2.0e+02	1.66004	7.22876	12	0.0304569
DNAm Plasminogen activator inhibitor 1	GO Biological Process	GO:0060712	spongiotrophoblast layer development	11	0.00302115	3.8e-02	3.9e-02	1.1e+01	6.56053	0.304854	2	0.0014448	0.00947867	1449	1.8e-01	2.0e-01	8.2e+01	4.95496	0.201818	1	0.0909091
DNAm Plasminogen activator inhibitor 1	GO Biological Process	GO:0021575	hindbrain morphogenesis	40	0.0120846	3.8e-02	3.9e-02	1.1e+01	3.1965	1.25137	4	0.00593066	0.0189574	81	6.0e-03	3.4e-02	7.8e+00	5.45045	0.733884	4	0.1
DNAm Plasminogen activator inhibitor 1	GO Biological Process	GO:0032703	negative regulation of interleukin-2 production	10	0.00302115	3.8e-02	3.9e-02	1.1e+01	6.56019	0.304869	2	0.00144488	0.00947867	1362	1.7e-01	1.9e-01	1.8e+02	5.45045	0.183471	1	0.1
DNAm Plasminogen activator inhibitor 1	GO Biological Process	GO:0097006	regulation of plasma lipoprotein particle levels	42	0.0060423	3.8e-02	3.9e-02	1.2e+01	4.09232	0.733081	3	0.00347432	0.014218	1432	1.8e-01	2.0e-01	1.0e+02	2.59545	0.770578	2	0.0476191
DNAm Plasminogen activator inhibitor 1	GO Biological Process	GO:0045017	glycerolipid biosynthetic process	210	0.021148	3.8e-02	3.9e-02	1.2e+01	2.10785	3.79534	8	0.0179874	0.0379147	857	9.3e-02	1.2e-01	1.5e+02	1.81682	3.85289	7	0.0333333
DNAm Plasminogen activator inhibitor 1	GO Biological Process	GO:0006606	protein import into nucleus	95	0.0151057	3.8e-02	3.9e-02	1.2e+01	2.43921	2.45981	6	0.0116579	0.028436	316	3.1e-02	6.3e-02	1.4e+02	2.86866	1.74297	5	0.0526316
DNAm Plasminogen activator inhibitor 1	GO Biological Process	GO:0030301	cholesterol transport	46	0.0060423	3.9e-02	3.9e-02	1.2e+01	4.06863	0.737349	3	0.00349454	0.014218	1596	2.1e-01	2.2e-01	7.9e+00	2.36976	0.843966	2	0.0434783
DNAm Plasminogen activator inhibitor 1	GO Biological Process	GO:0015711	organic anion transport	302	0.0302115	3.9e-02	3.9e-02	1.2e+01	1.84351	5.96687	11	0.028279	0.0521327	507	5.3e-02	8.3e-02	1.8e+02	1.80479	5.54082	10	0.0331126
DNAm Plasminogen activator inhibitor 1	GO Biological Process	GO:0042517	positive regulation of tyrosine phosphorylation of Stat3 protein	27	0.00906344	3.9e-02	3.9e-02	1.2e+01	4.05103	0.740552	3	0.00350973	0.014218	127	1.3e-02	4.9e-02	7.7e+01	6.05606	0.495372	3	0.111111
DNAm Plasminogen activator inhibitor 1	MSigDB Pathway	KEGG_ADIPOCYTOKINE_SIGNALING_PATHWAY	Adipocytokine signaling pathway	67	0.0271903	3.6e-07	1.8e-04	1.8e-04	7.50438	1.46581	11	0.00694697	0.0521327	1	3.5e-06	1.8e-03	2.1e-01	7.3215	1.22926	9	0.134328
DNAm Plasminogen activator inhibitor 1	MSigDB Pathway	BIOCARTA_LEPTIN_PATHWAY	Reversal of Insulin Resistance by Leptin	11	0.00906344	3.6e-05	6.4e-03	1.8e-02	22.3271	0.179154	4	0.000849074	0.0189574	3	9.1e-04	1.5e-01	2.0e+00	14.8649	0.201818	3	0.272727
DNAm Plasminogen activator inhibitor 1	MSigDB Pathway	PID_IL4_2PATHWAY	IL4-mediated signaling events	62	0.0151057	3.9e-05	6.4e-03	1.9e-02	6.53389	1.22439	8	0.00580278	0.0379147	12	5.6e-03	2.3e-01	1.3e+01	4.39553	1.13752	5	0.0806452
DNAm Plasminogen activator inhibitor 1	MSigDB Immunologic Signatures	GSE39820_CTRL_VS_TGFBETA3_IL6_IL23A_CD4_TCELL_DN	Genes down-regulated in comparison of untreated CD4 [GeneID=920] T cells versus those treated with TGFB3 [GeneID=7043], IL6 [GeneID=3569] and IL32A [GeneID=51561].	196	0.0362538	1.1e-06	5.3e-04	5.3e-04	5.04497	2.77504	14	0.0131519	0.0663507	1	2.8e-04	1.2e-01	2.1e-01	3.33701	3.59603	12	0.0612245

## Sheet: TIMP_1
DNAm	Database	ID	Desc	GeneSetSize	GeneSetCov	BinomP	Binom.FDR	Binom.Bon	RegionFoldEnrich	ExpRegions	ObsRegions	GenomeFrac	SetCov	HyperRank	HyperP	Hyper.FDR	Hyper.Bon	GeneFoldEnrich	ExpGenes	ObsGenes	TermCov
DNAm Tissue Inhibitor Metalloproteinases 1	MSigDB Pathway	REACTOME_METABOLISM_OF_LIPIDS_AND_LIPOPROTEINS	Genes involved in Metabolism of lipids and lipoproteins	471	0.0972222	2.7e-04	2.9e-02	7.2e-02	4.63465	1.72613	8	0.0410983	0.190476	12	2.7e-03	5.7e-02	9.5e-02	3.72396	1.87972	7	0.014862
DNAm Tissue Inhibitor Metalloproteinases 1	MSigDB Pathway	REACTOME_DEVELOPMENTAL_BIOLOGY	Genes involved in Developmental Biology	387	0.125	3.7e-04	2.9e-02	9.7e-02	3.92242	2.2945	9	0.054631	0.214286	1	2.3e-05	5.9e-03	6.6e-01	5.8272	1.54448	9	0.0232558
DNAm Tissue Inhibitor Metalloproteinases 1	MSigDB Pathway	REACTOME_YAP1_AND_WWTR1_TAZ_STIMULATED_GENE_EXPRESSION	Genes involved in YAP1- and WWTR1 (TAZ)-stimulated gene expression	24	0.0416667	5.3e-04	2.9e-02	1.4e-01	19.2207	0.156082	3	0.00371623	0.0714286	3	1.2e-04	7.6e-03	1.6e-01	31.3212	0.0957818	3	0.125
DNAm Tissue Inhibitor Metalloproteinases 1	MSigDB Pathway	REACTOME_CIRCADIAN_REPRESSION_OF_EXPRESSION_BY_REV_ERBA	Genes involved in Circadian Repression of Expression by REV-ERBA	23	0.0416667	6.1e-04	2.9e-02	1.6e-01	18.3186	0.163768	3	0.00389923	0.0714286	2	1.0e-04	7.6e-03	3.1e+00	32.683	0.0917909	3	0.130435
DNAm Tissue Inhibitor Metalloproteinases 1	MSigDB Pathway	REACTOME_RORA_ACTIVATES_CIRCADIAN_EXPRESSION	Genes involved in RORA Activates Circadian Expression	24	0.0416667	6.6e-04	2.9e-02	1.7e-01	17.7764	0.168763	3	0.00401816	0.0714286	3	1.2e-04	7.6e-03	6.9e+00	31.3212	0.0957818	3	0.125
DNAm Tissue Inhibitor Metalloproteinases 1	MSigDB Pathway	REACTOME_FATTY_ACID_TRIACYLGLYCEROL_AND_KETONE_BODY_METABOLISM	Genes involved in Fatty acid, triacylglycerol, and ketone body metabolism	168	0.0555556	6.7e-04	2.9e-02	1.7e-01	7.1127	0.702968	5	0.0167373	0.119048	15	4.6e-03	7.7e-02	8.5e-01	5.96594	0.670473	4	0.0238095

## Sheet: PACKYRS
DNAm	Database	ID	Desc	GeneSetSize	GeneSetCov	BinomP	Binom.FDR	Binom.Bon	RegionFoldEnrich	ExpRegions	ObsRegions	GenomeFrac	SetCov	HyperRank	HyperP	Hyper.FDR	Hyper.Bon	GeneFoldEnrich	ExpGenes	ObsGenes	TermCov
DNAm Pack years	GO Biological Process	GO:0033233	regulation of protein sumoylation	16	0.0117188	8.6e-06	2.3e-03	2.3e-03	18.7355	0.266873	5	0.00155159	0.0290698	14	1.4e-03	3.1e-02	5.1e+00	13.2136	0.227038	3	0.1875
DNAm Pack years	GO Biological Process	GO:0033235	positive regulation of protein sumoylation	10	0.0078125	2.2e-05	2.9e-03	5.9e-03	25.4196	0.157359	4	0.000914877	0.0232558	71	8.4e-03	5.1e-02	1.1e+00	14.0945	0.141899	2	0.2
DNAm Pack years	MSigDB Pathway	PID_RANBP2PATHWAY	Sumoylation by RanBP2 regulates transcriptional repression	11	0.015625	4.4e-05	2.2e-02	2.2e-02	21.1562	0.18907	4	0.00109924	0.0232558	1	1.2e-05	6.0e-03	9.5e+00	25.6264	0.156089	4	0.363636
DNAm Pack years	MSigDB Immunologic Signatures	GSE14000_TRANSLATED_RNA_VS_MRNA_4H_LPS_DC_DN	Genes down-regulated in comparison of polysome bound (translated) mRNA versus total mRNA 4 h after LPS (TLR4 agonist) stimulation.	178	0.0429688	8.0e-06	4.0e-03	4.0e-03	5.39355	2.03947	11	0.0118574	0.0639535	1	4.9e-05	2.4e-02	9.5e+00	4.35505	2.5258	11	0.0617977
DNAm Pack years	MSigDB Immunologic Signatures	GSE360_CTRL_VS_L_DONOVANI_MAC_UP	Genes up-regulated in comparison of macrophages versus macrophages exposed to L.donovani.	197	0.0390625	7.0e-05	1.7e-02	3.5e-02	4.24384	2.59199	11	0.0150697	0.0639535	2	5.3e-04	1.3e-01	2.0e+00	3.57729	2.79541	10	0.0507614
DNAm Pack years	MSigDB Immunologic Signatures	GSE17721_PAM3CSK4_VS_GADIQUIMOD_4H_BMDM_UP	Genes up-regulated in comparison of dendritic cells (DC) stimulated with Pam3Csk4 (TLR1/2 agonist) at 4 h versus DC cells stimulated with Gardiquimod (TLR7 agonist) at 4 h.	200	0.03125	1.9e-04	2.9e-02	9.4e-02	3.78462	2.9065	11	0.0168983	0.0639535	25	7.9e-03	1.5e-01	7.1e+00	2.81891	2.83798	8	0.04
DNAm Pack years	MSigDB Immunologic Signatures	GSE360_CTRL_VS_B_MALAYI_HIGH_DOSE_MAC_UP	Genes up-regulated in comparison of macrophages versus macrophages exposed to B. malayi (50 worms/well).	207	0.0390625	2.3e-04	2.9e-02	1.1e-01	3.69666	2.97566	11	0.0173003	0.0639535	3	7.7e-04	1.3e-01	2.1e+01	3.40448	2.93731	10	0.0483092

[truncated: 1 more sheets: ALL_list]
